# Supplementary material
Source: PubMed Central journal article supplement (PMC9547948)

# Keratoconic SyntEyes

SyntEye 1 - 5mm pupil

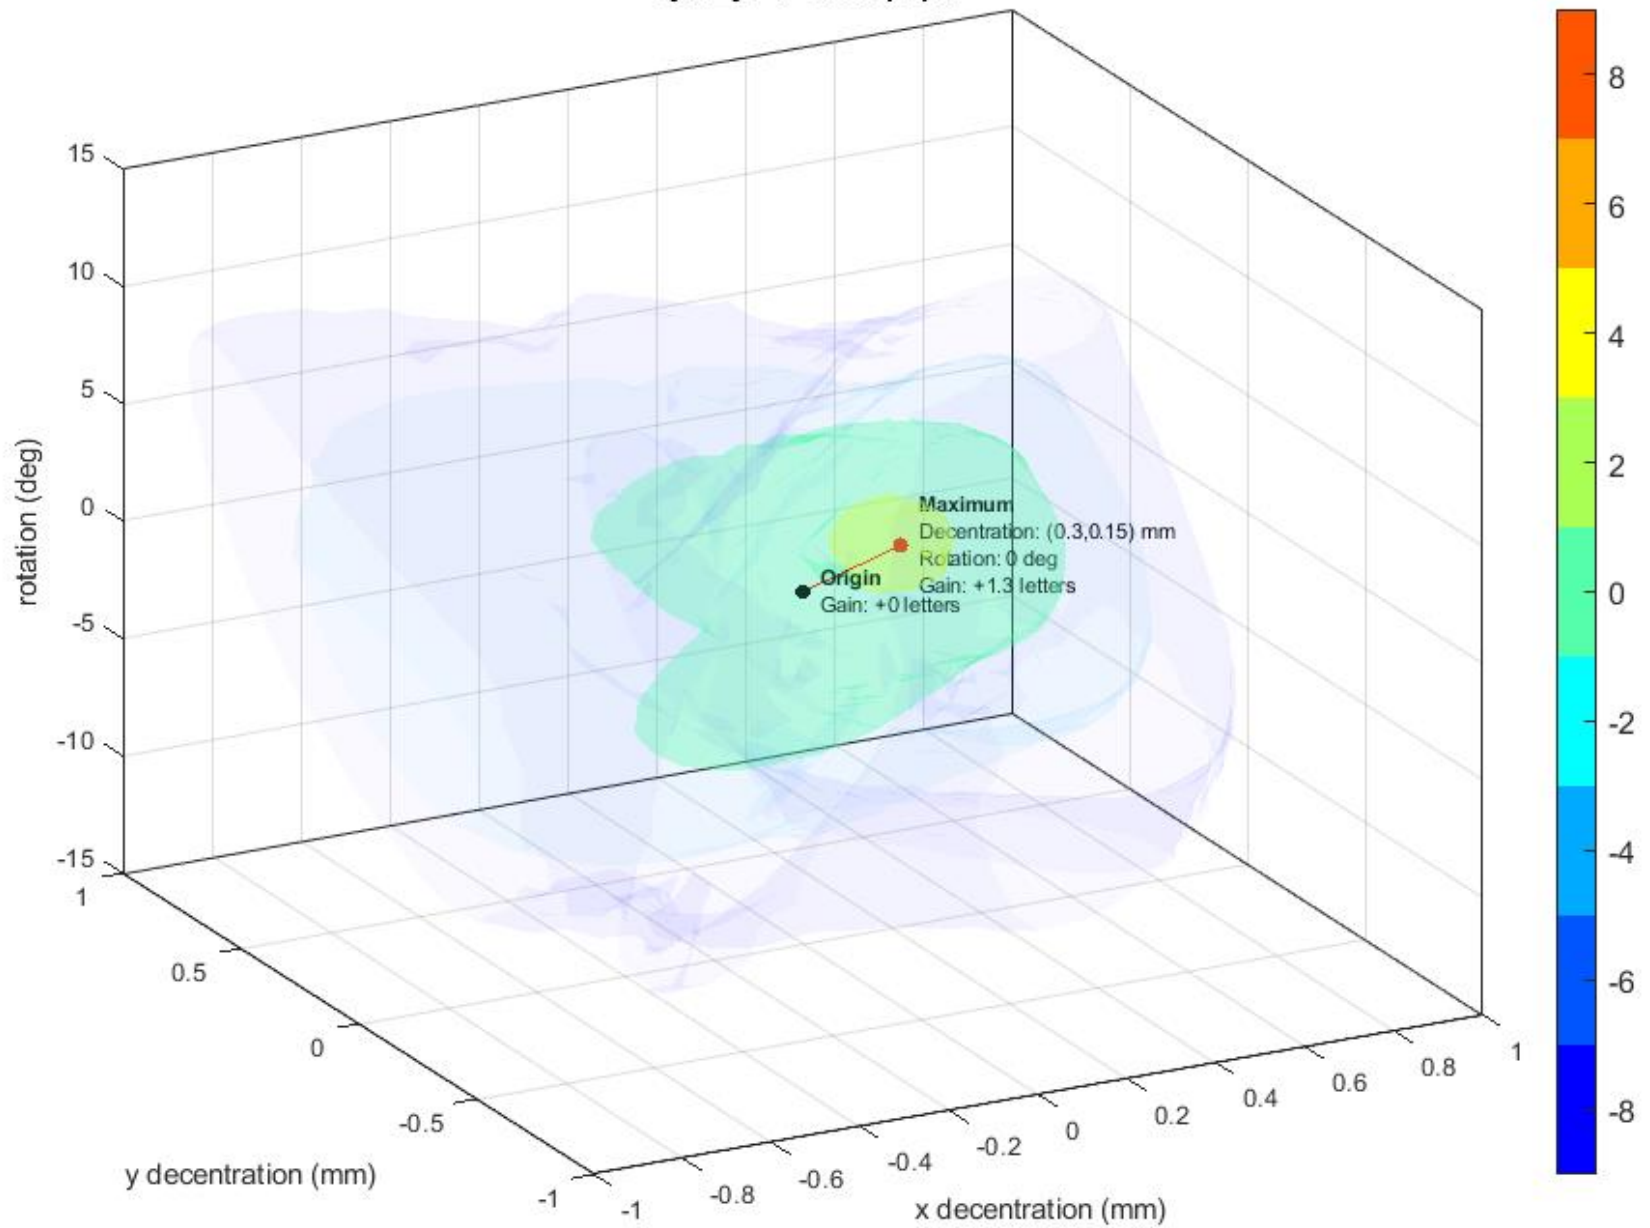

SyntEye 2 - 5mm pupil

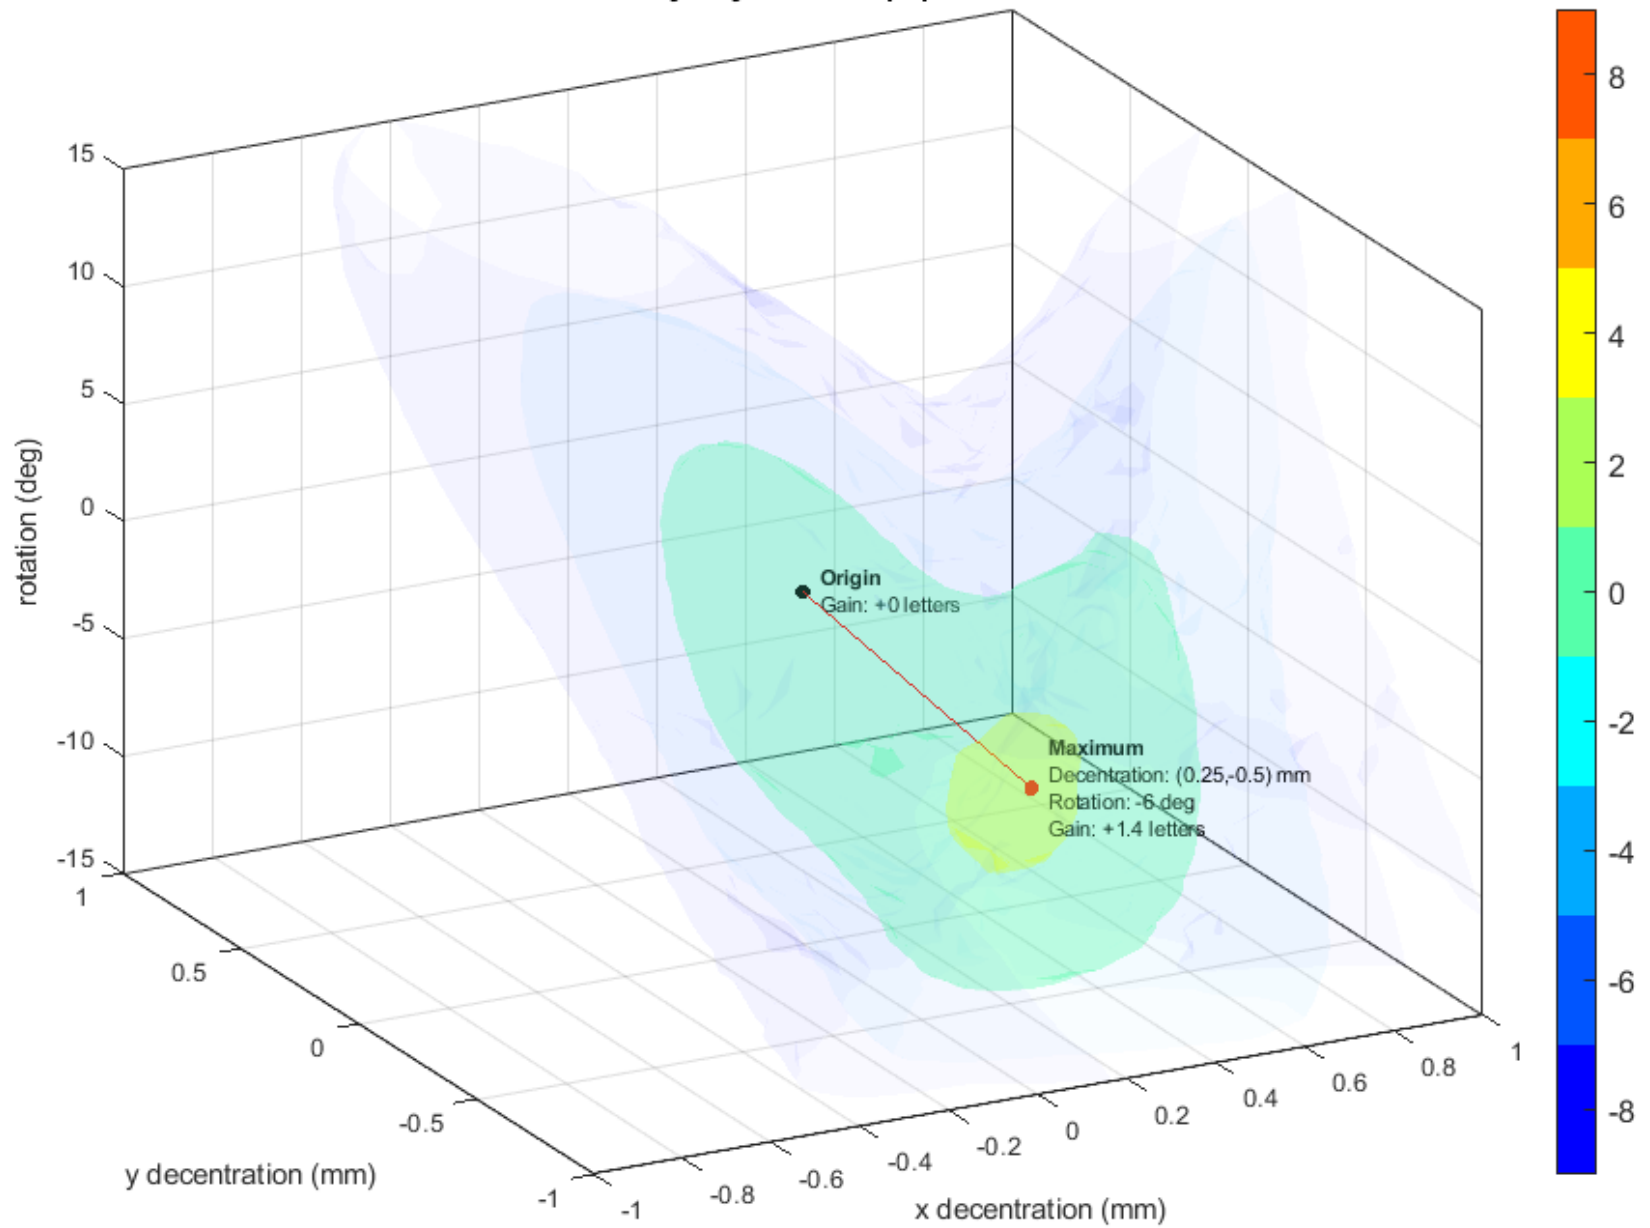

SyntEye 3 - 5mm pupil

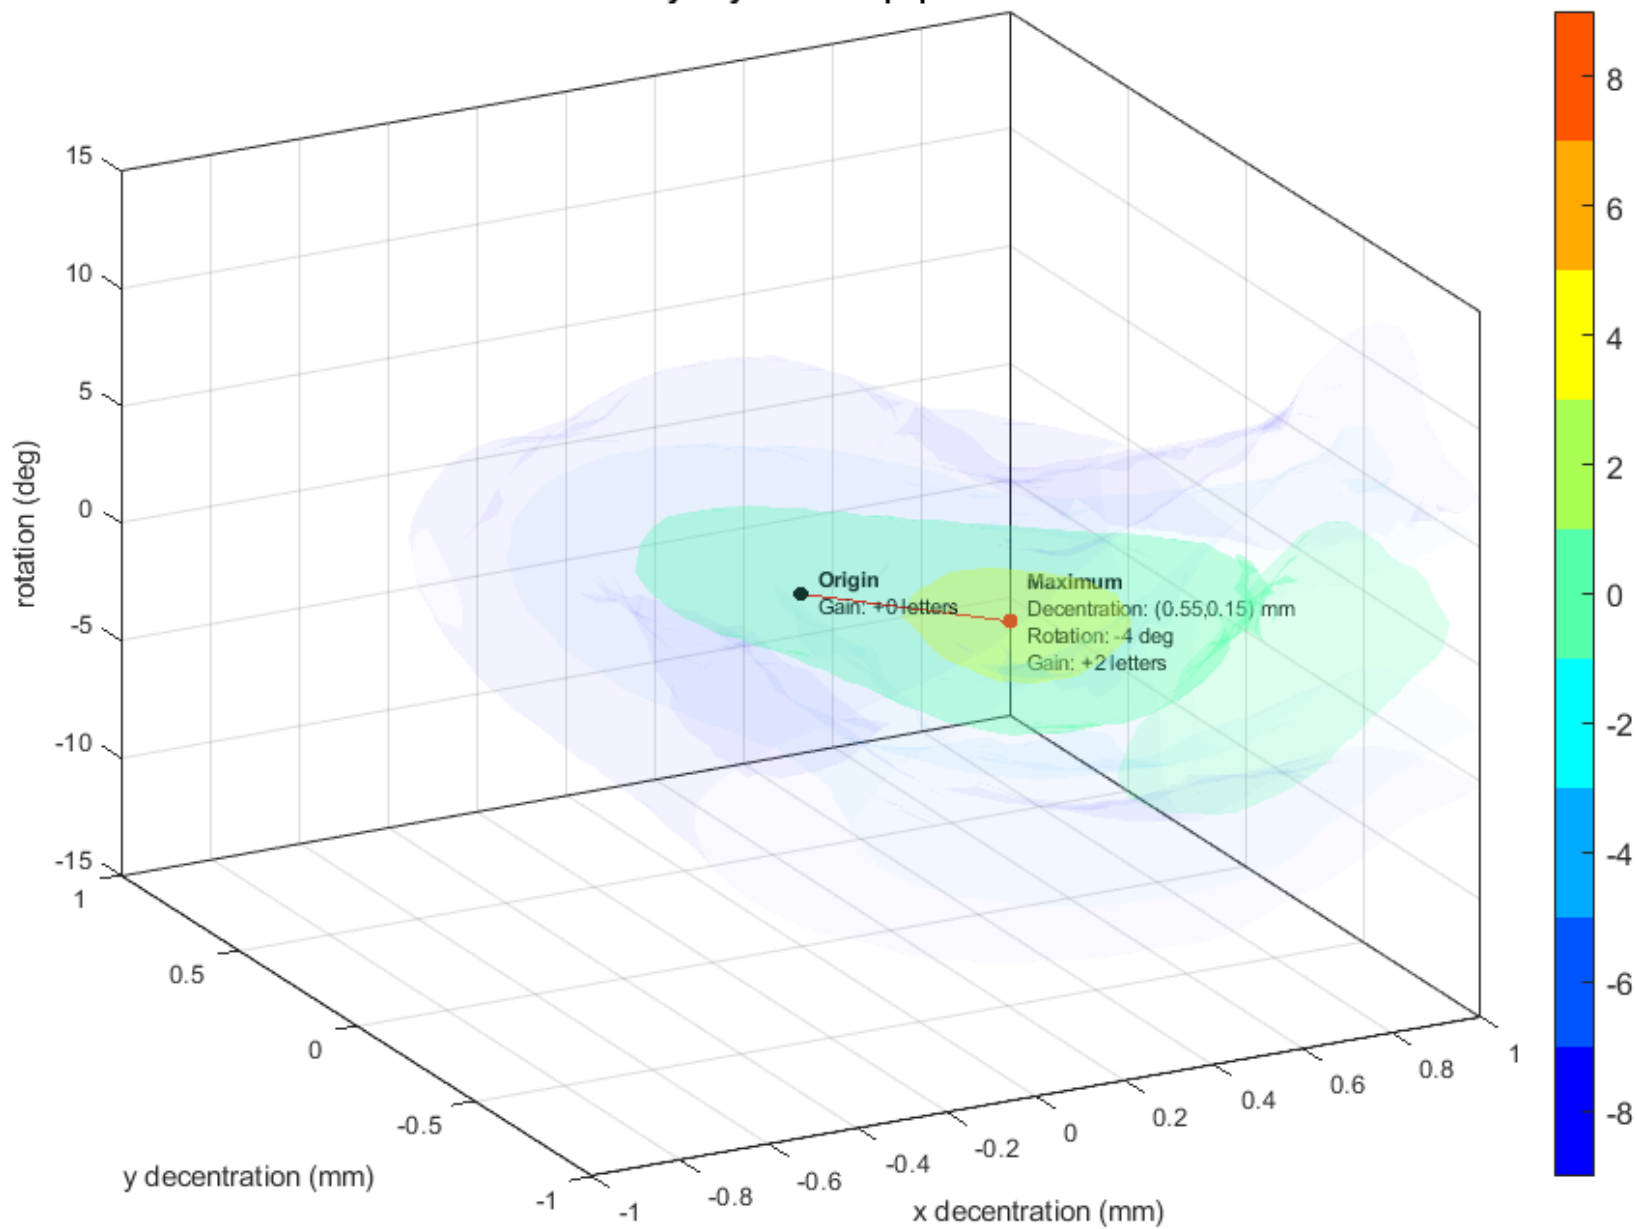

SyntEye 4 - 5mm pupil

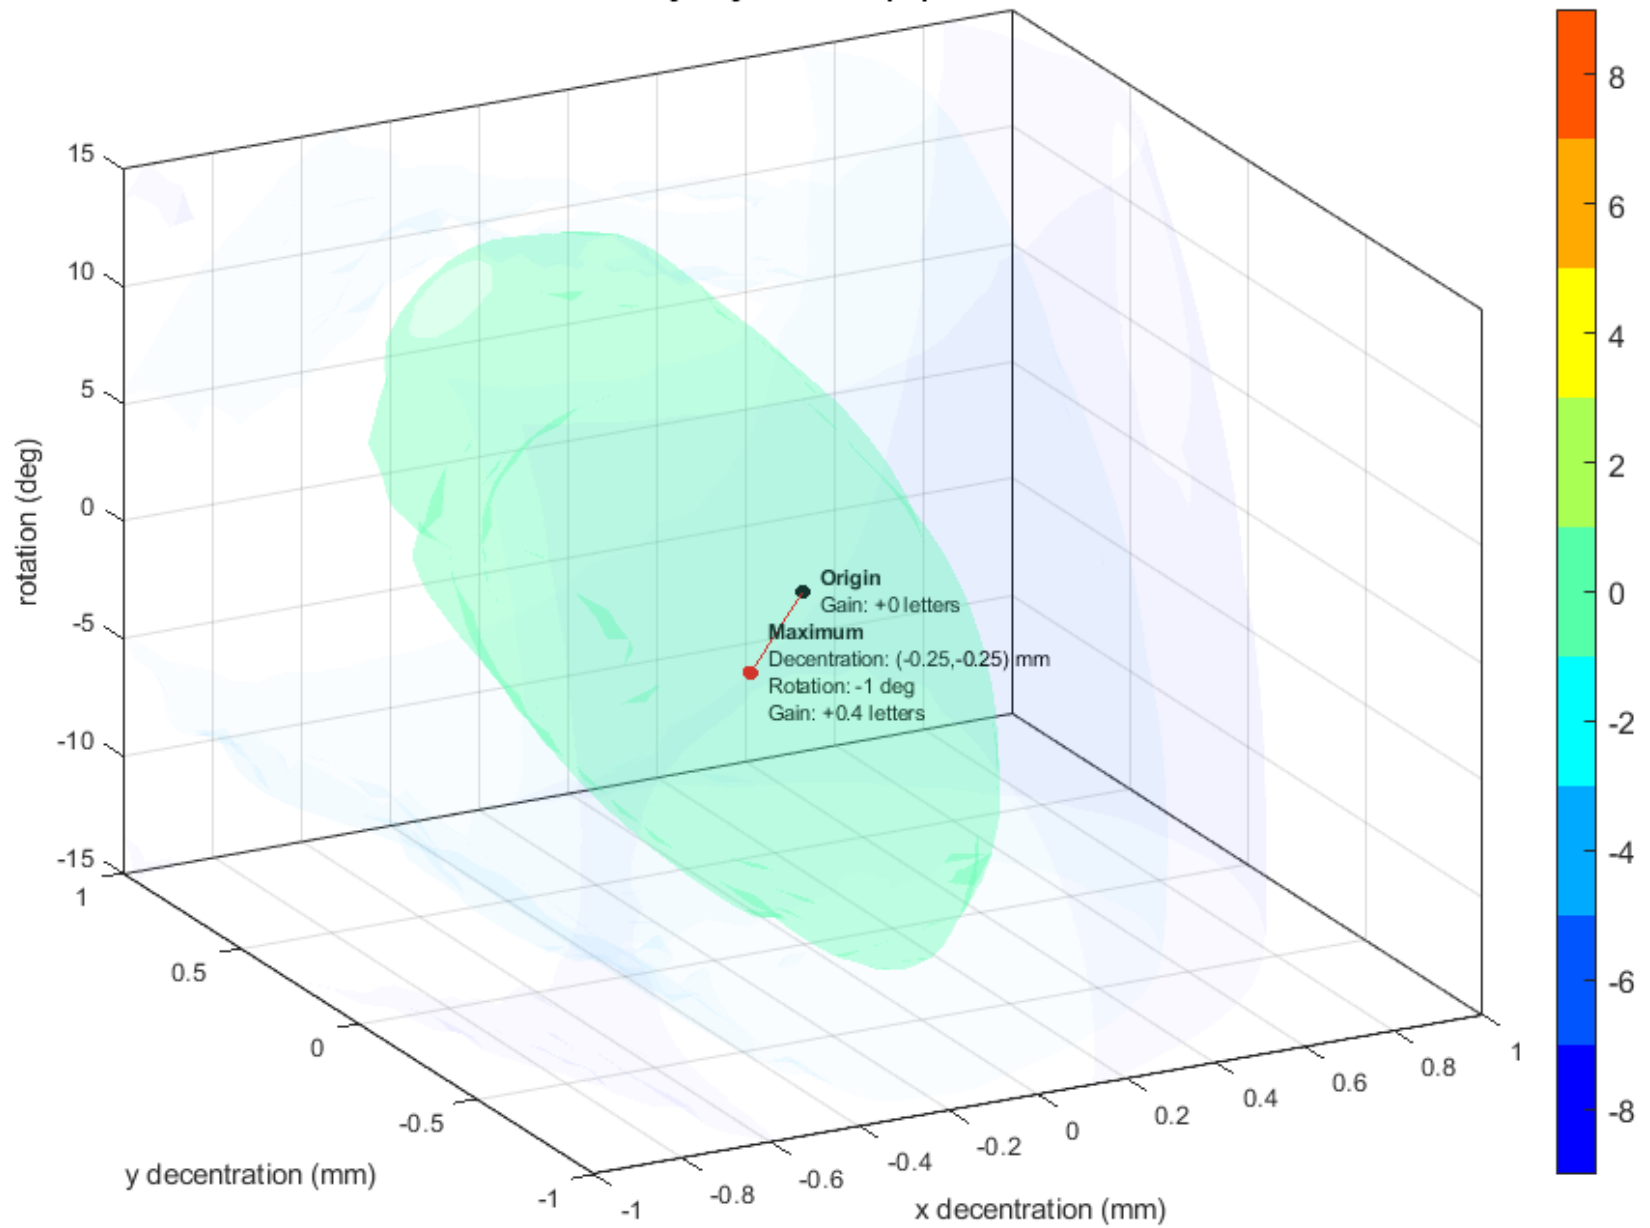

SyntEye 6 - 5mm pupil

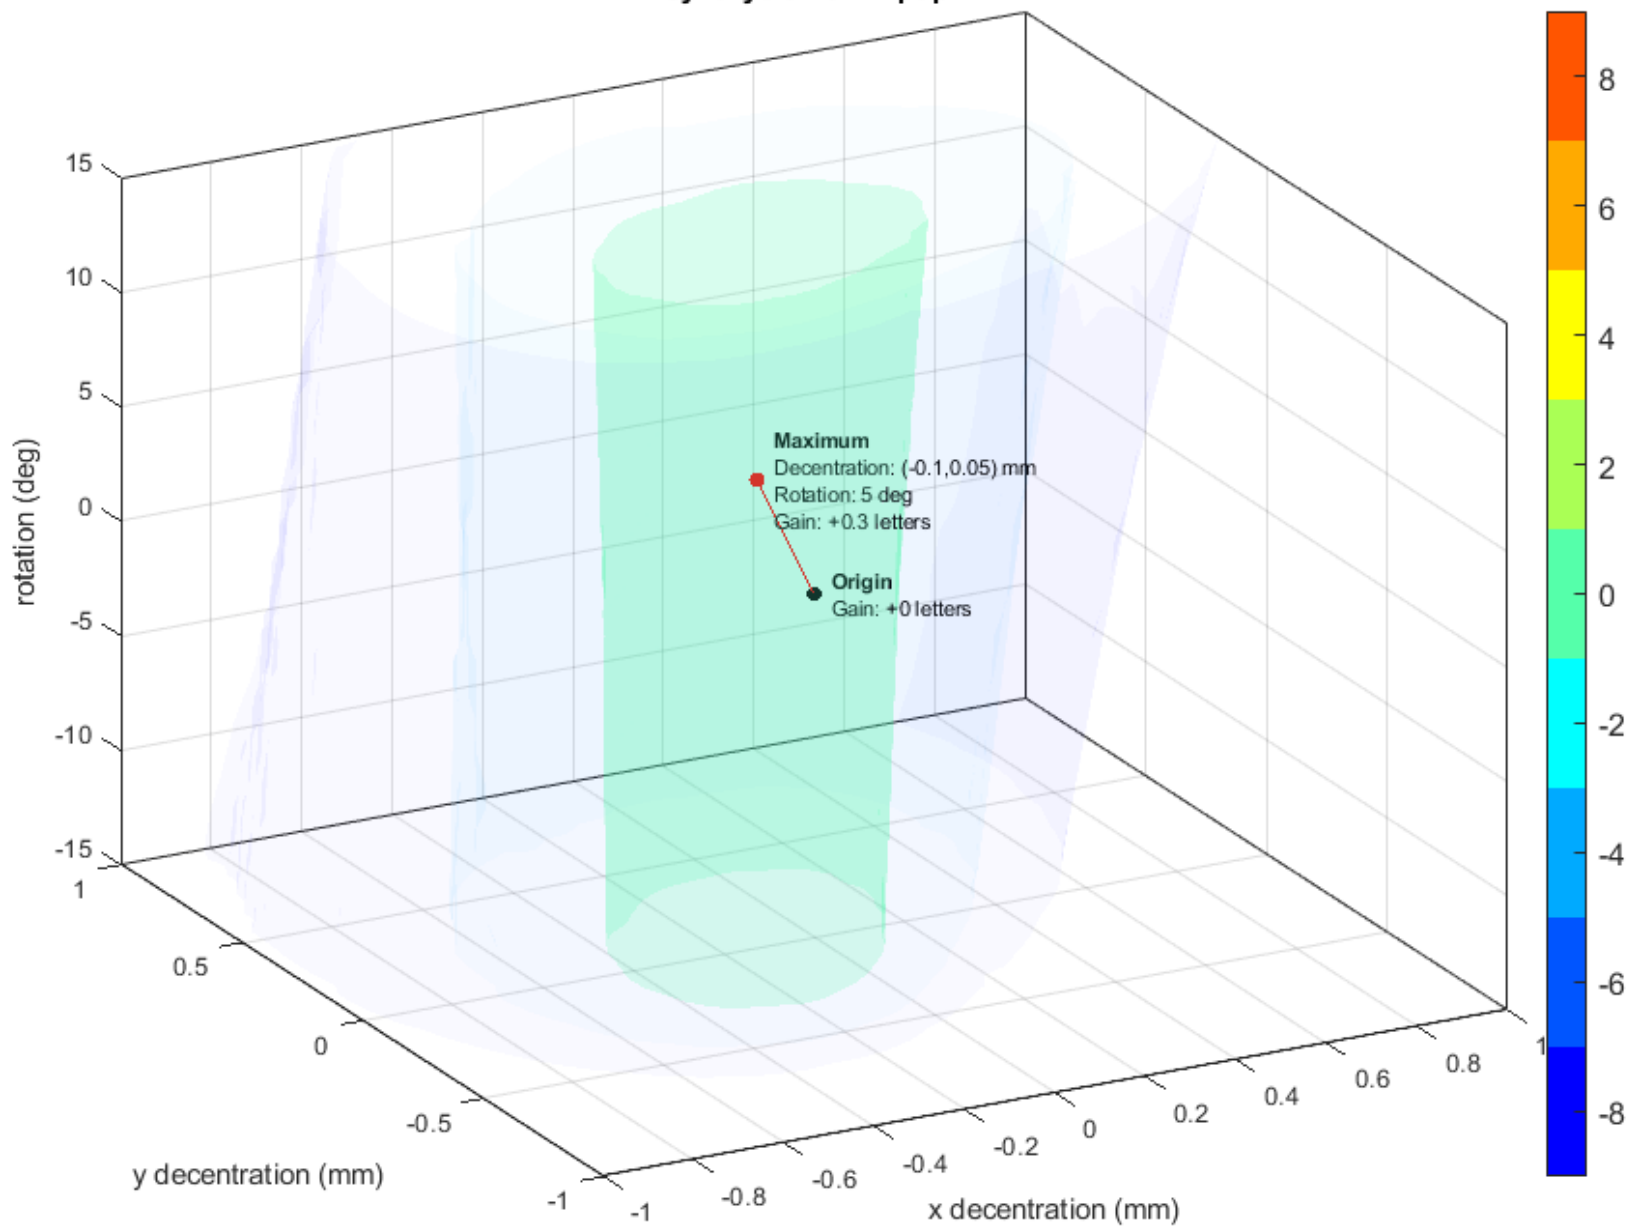

SyntEye 7 - 5mm pupil

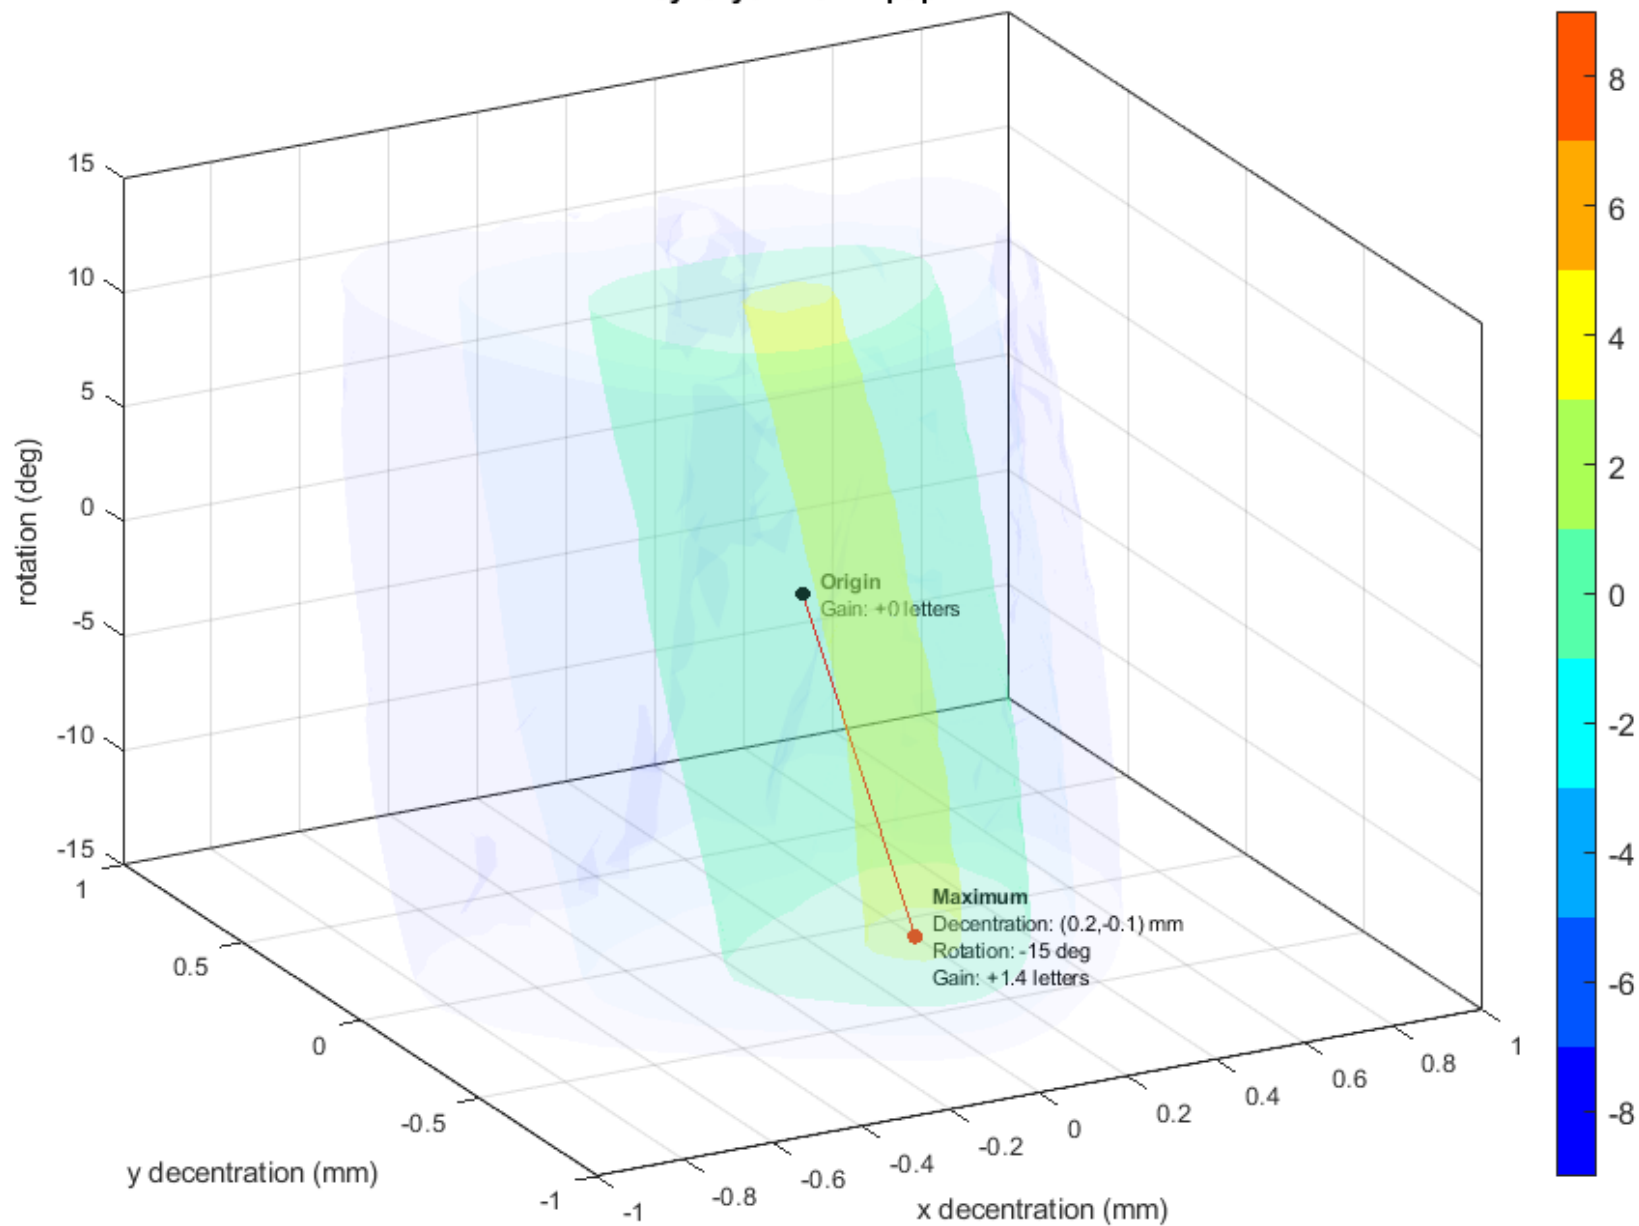

SyntEye 9 - 5mm pupil

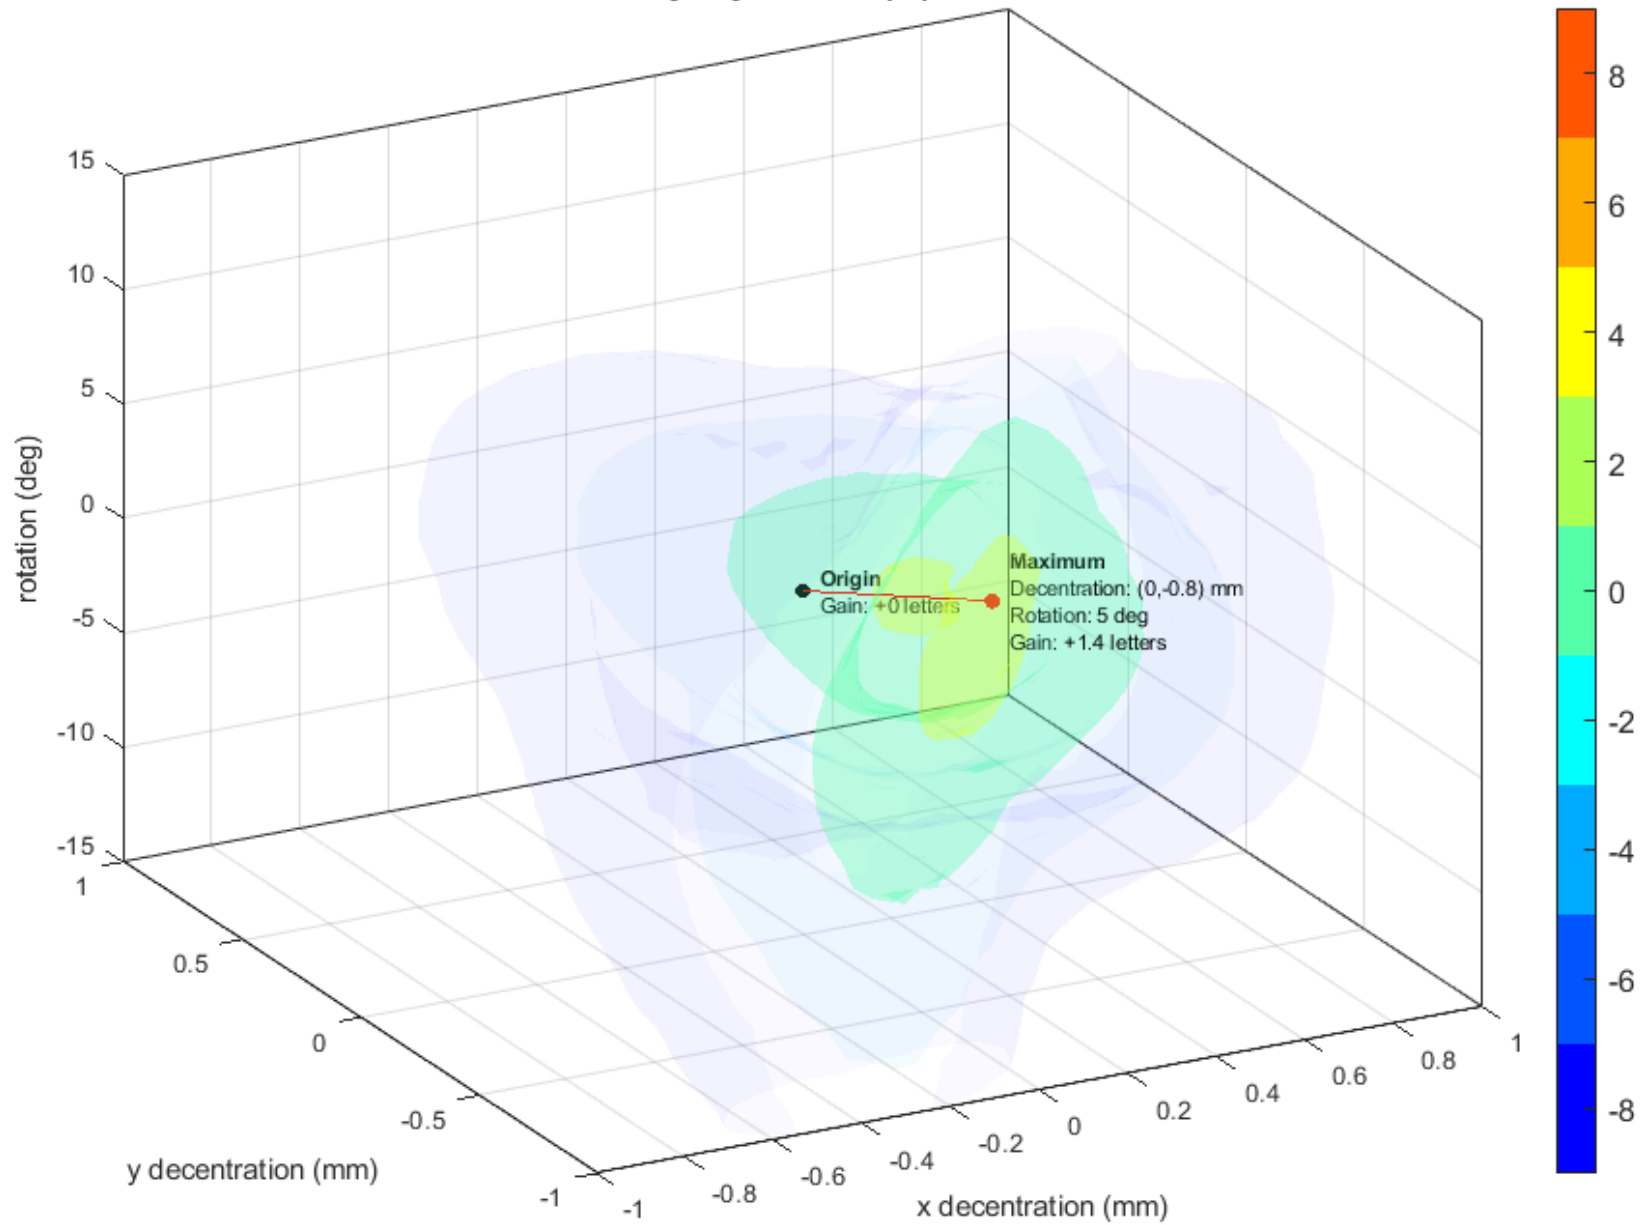



SyntEye 10 - 5mm pupil

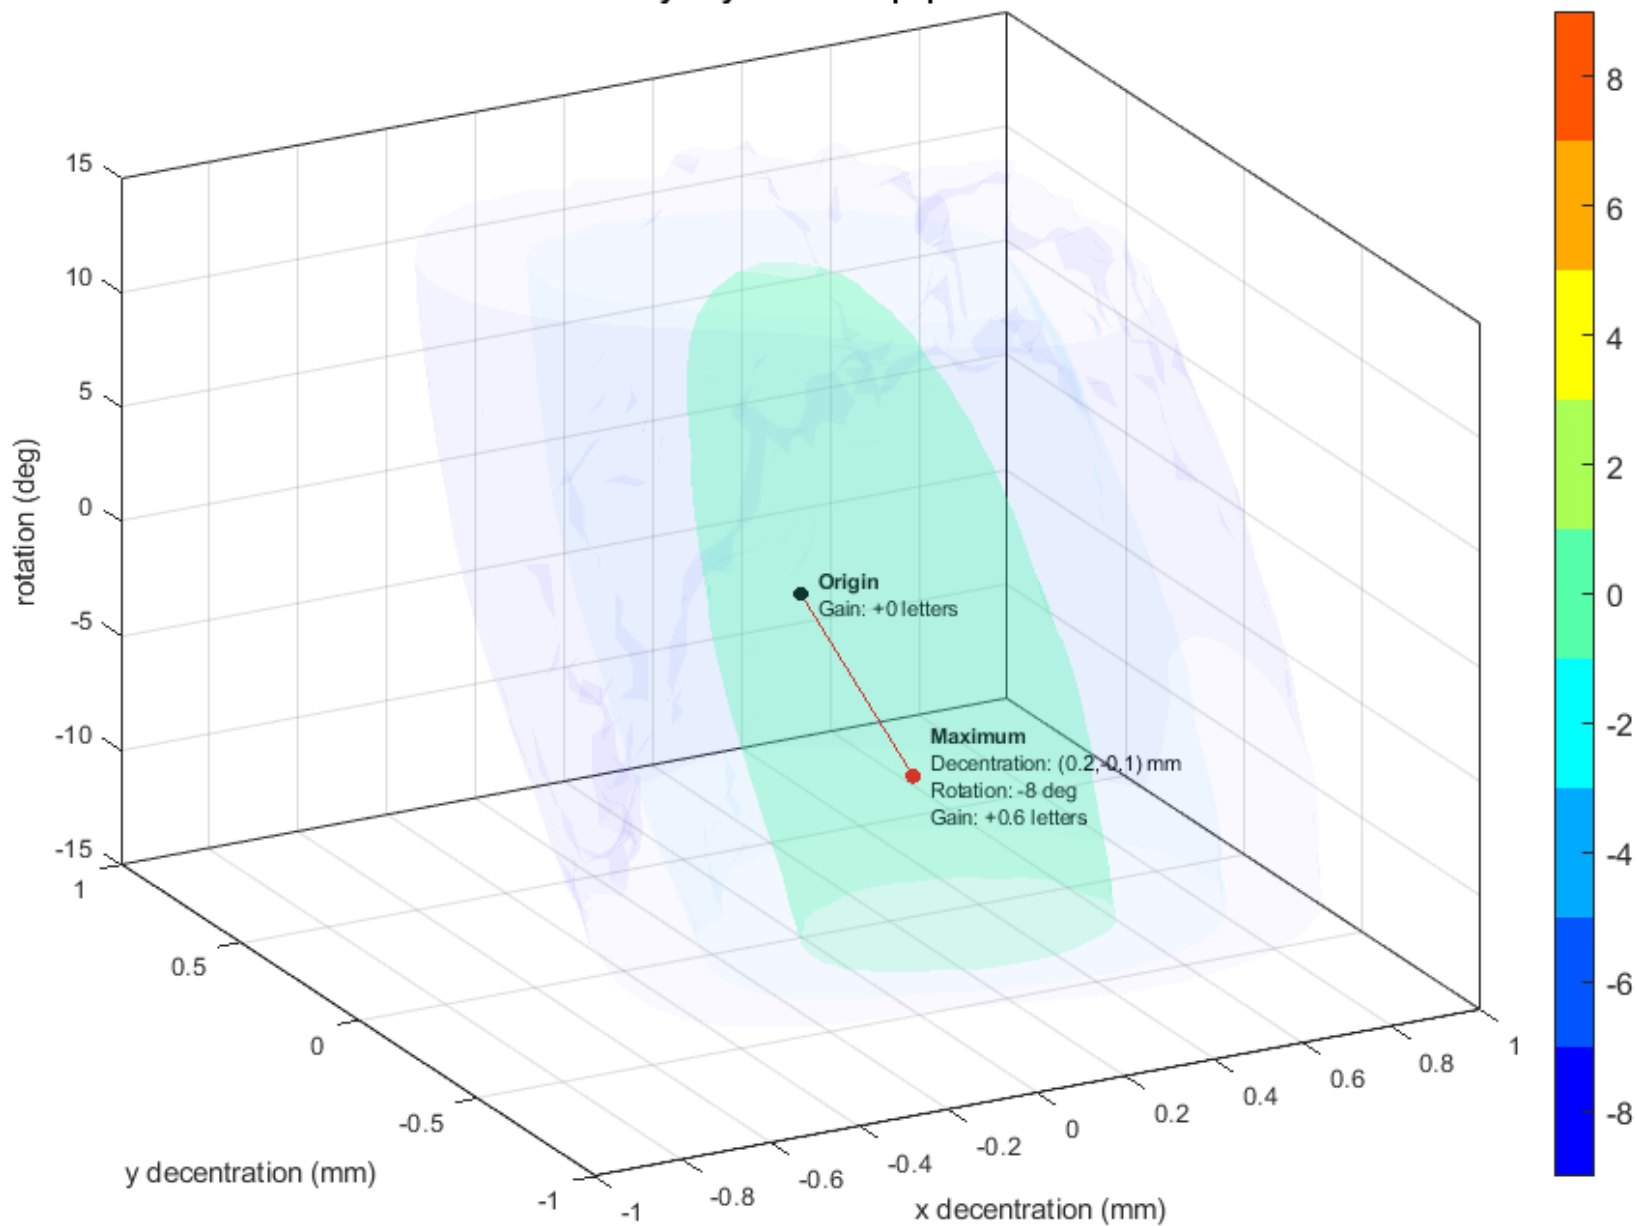

SyntEye 14 - 5mm pupil

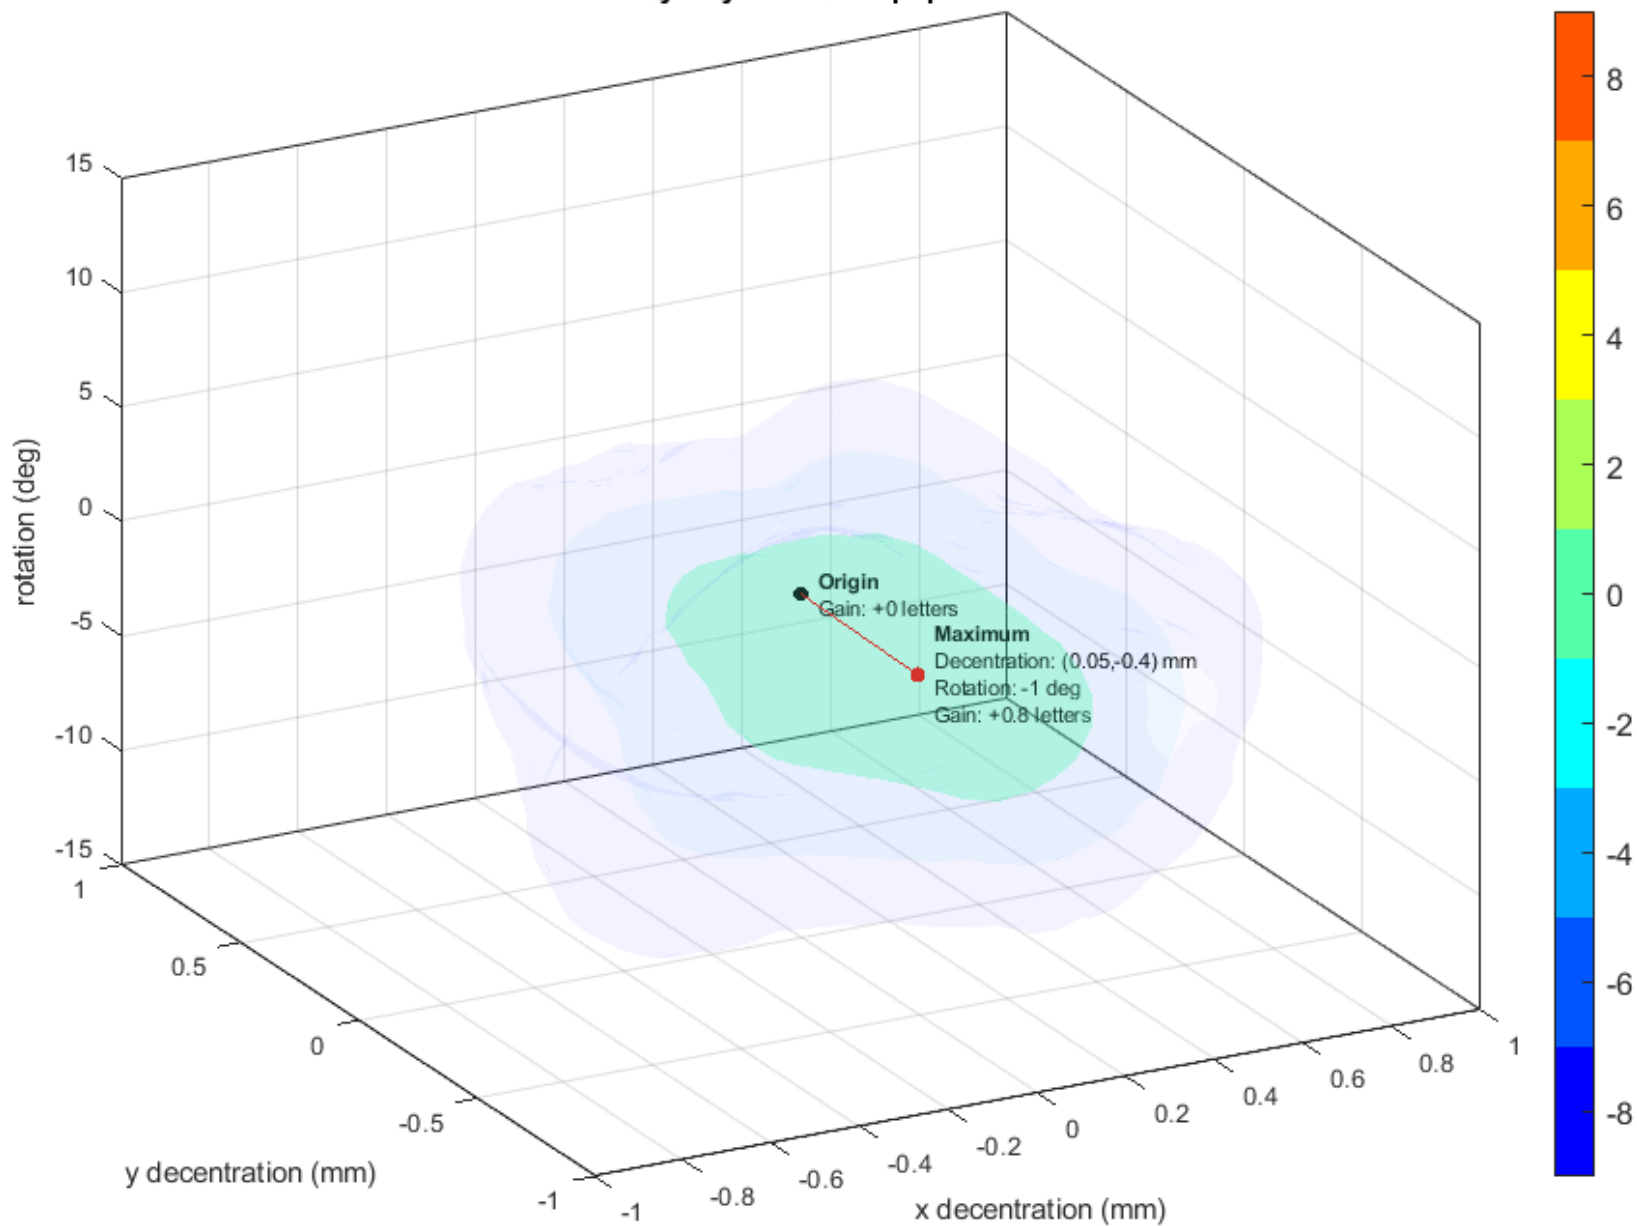

SyntEye 15 - 5mm pupil

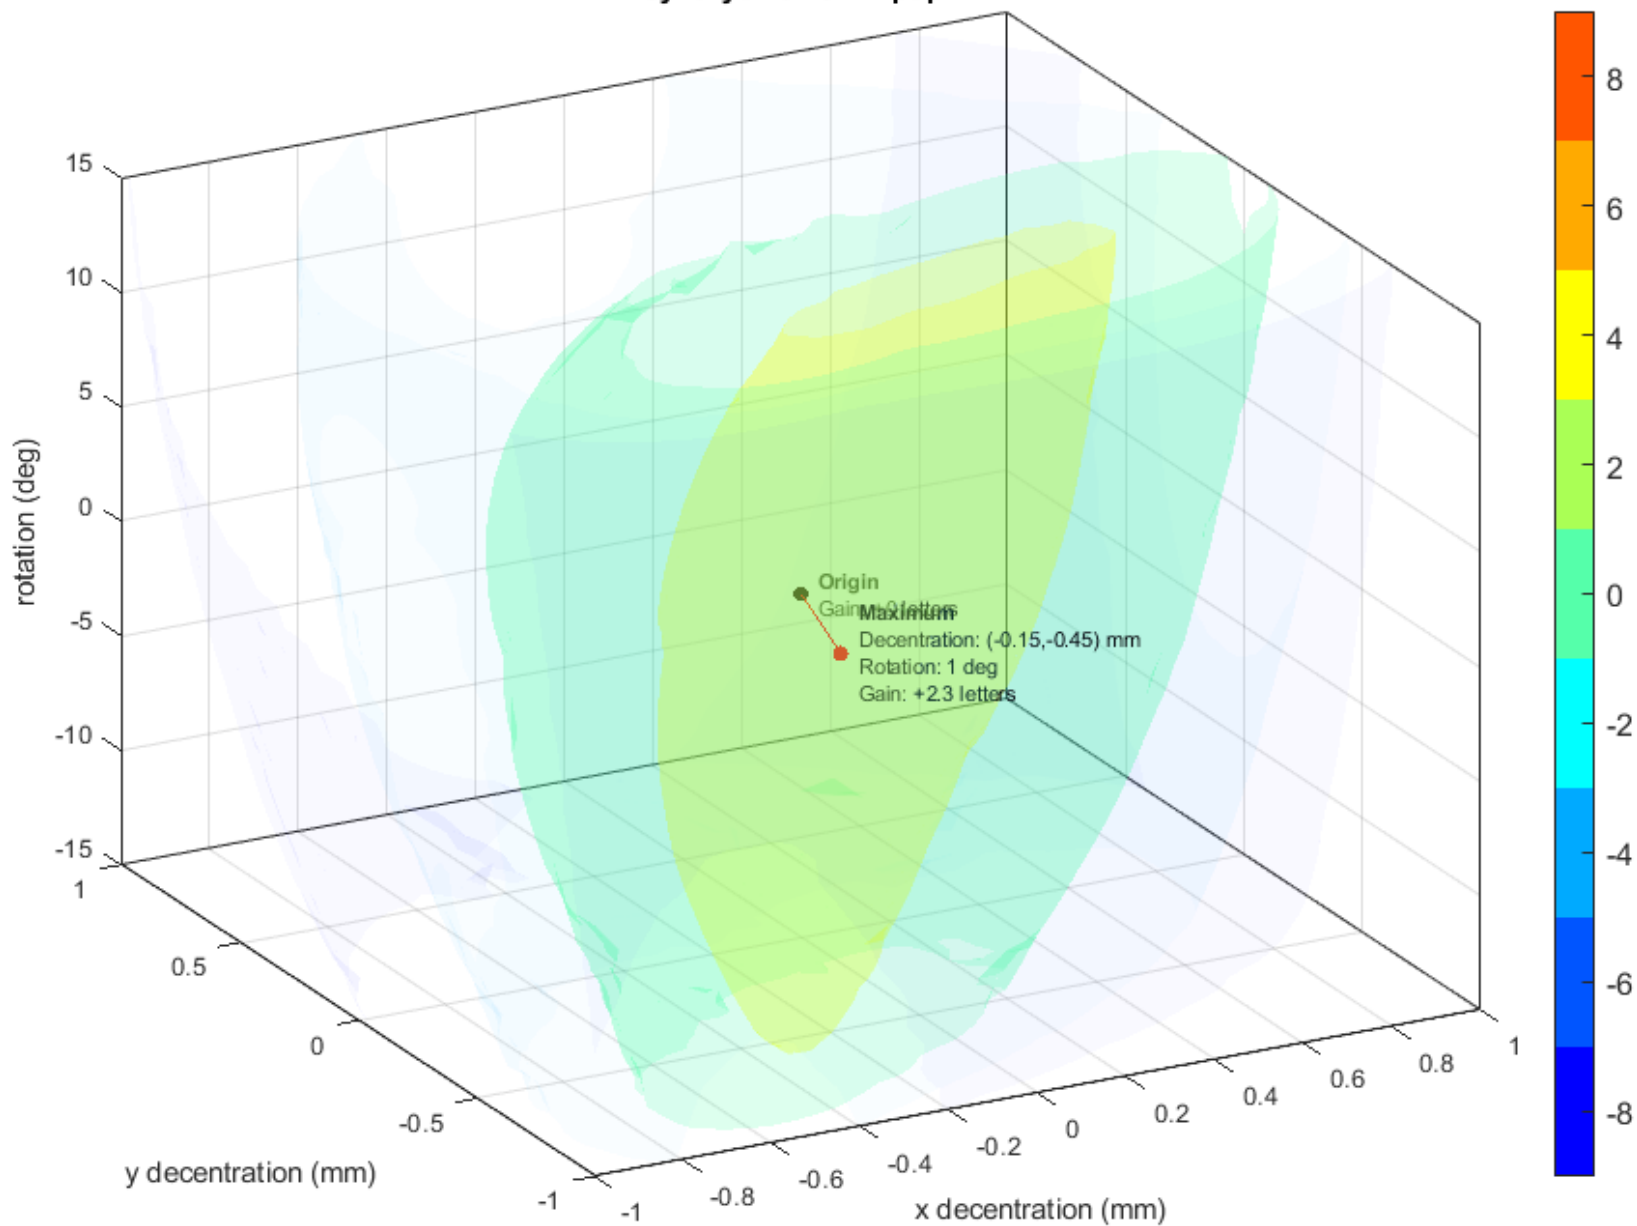

SyntEye 16 - 5mm pupil

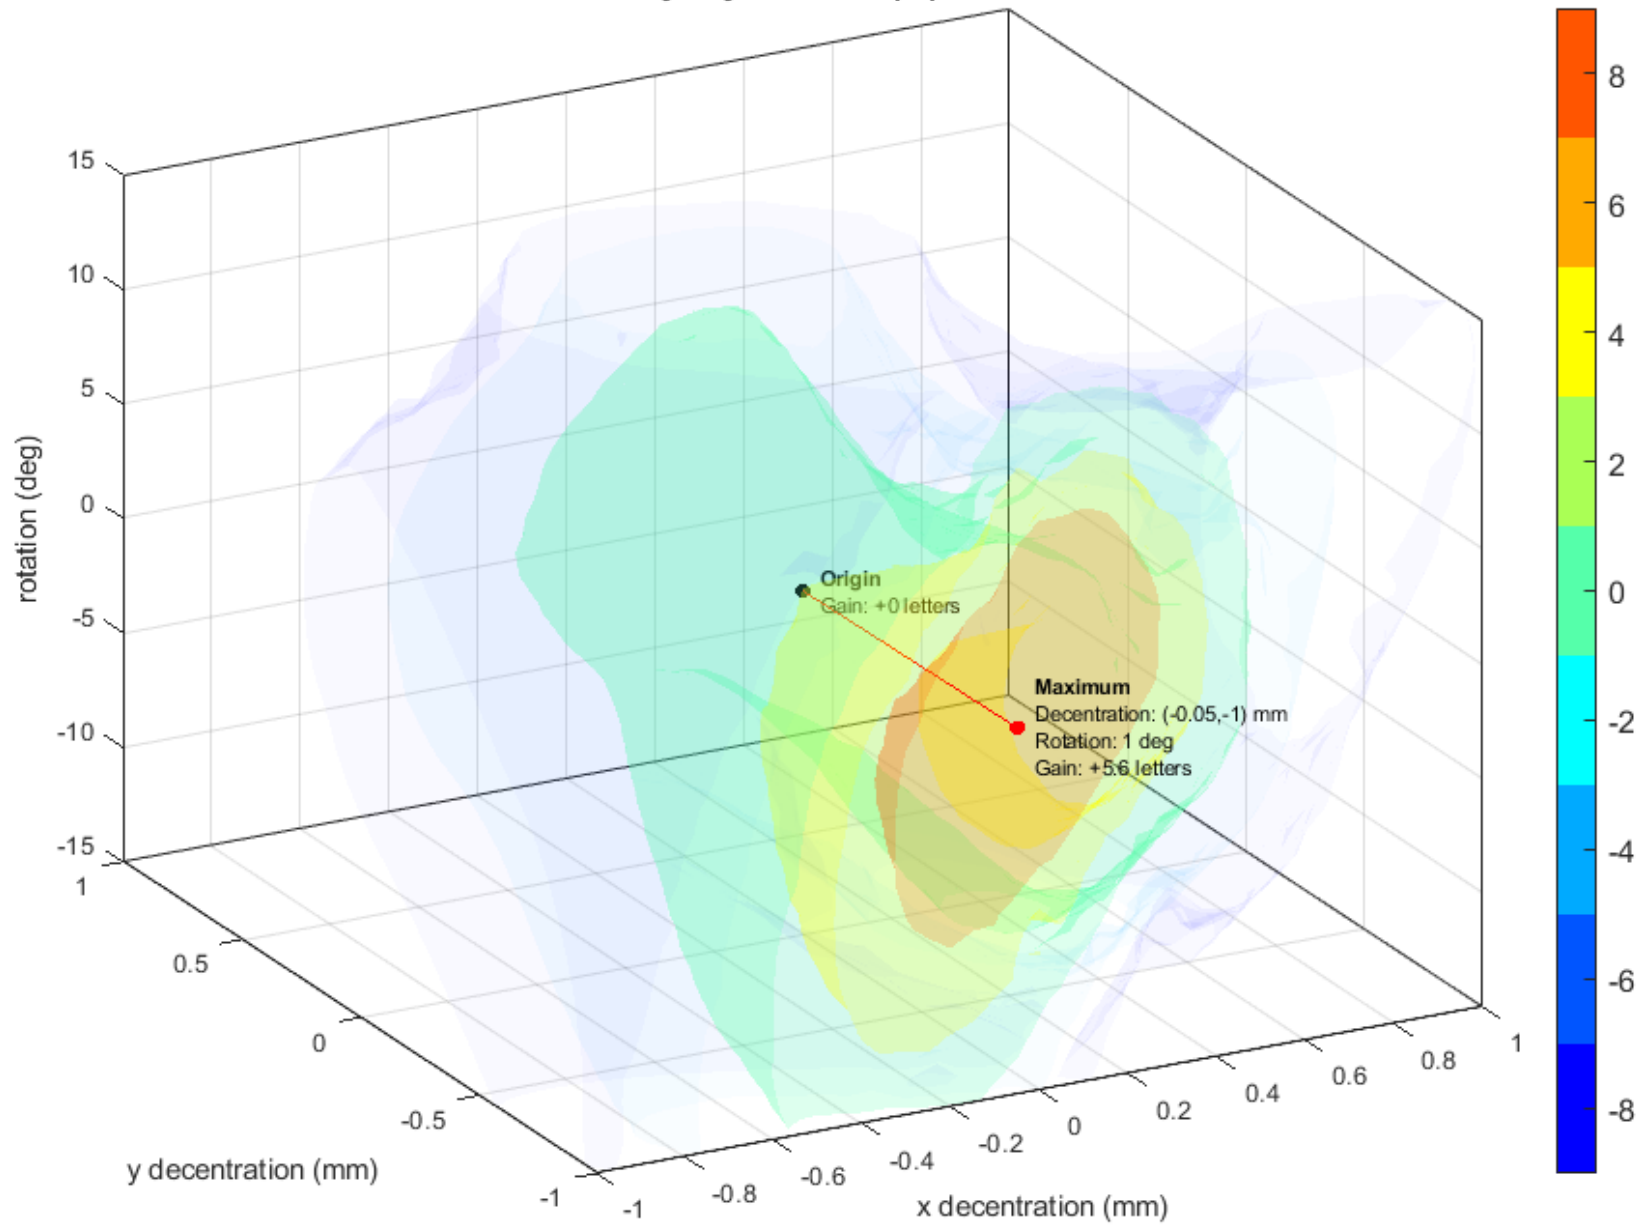

SyntEye 17 - 5mm pupil

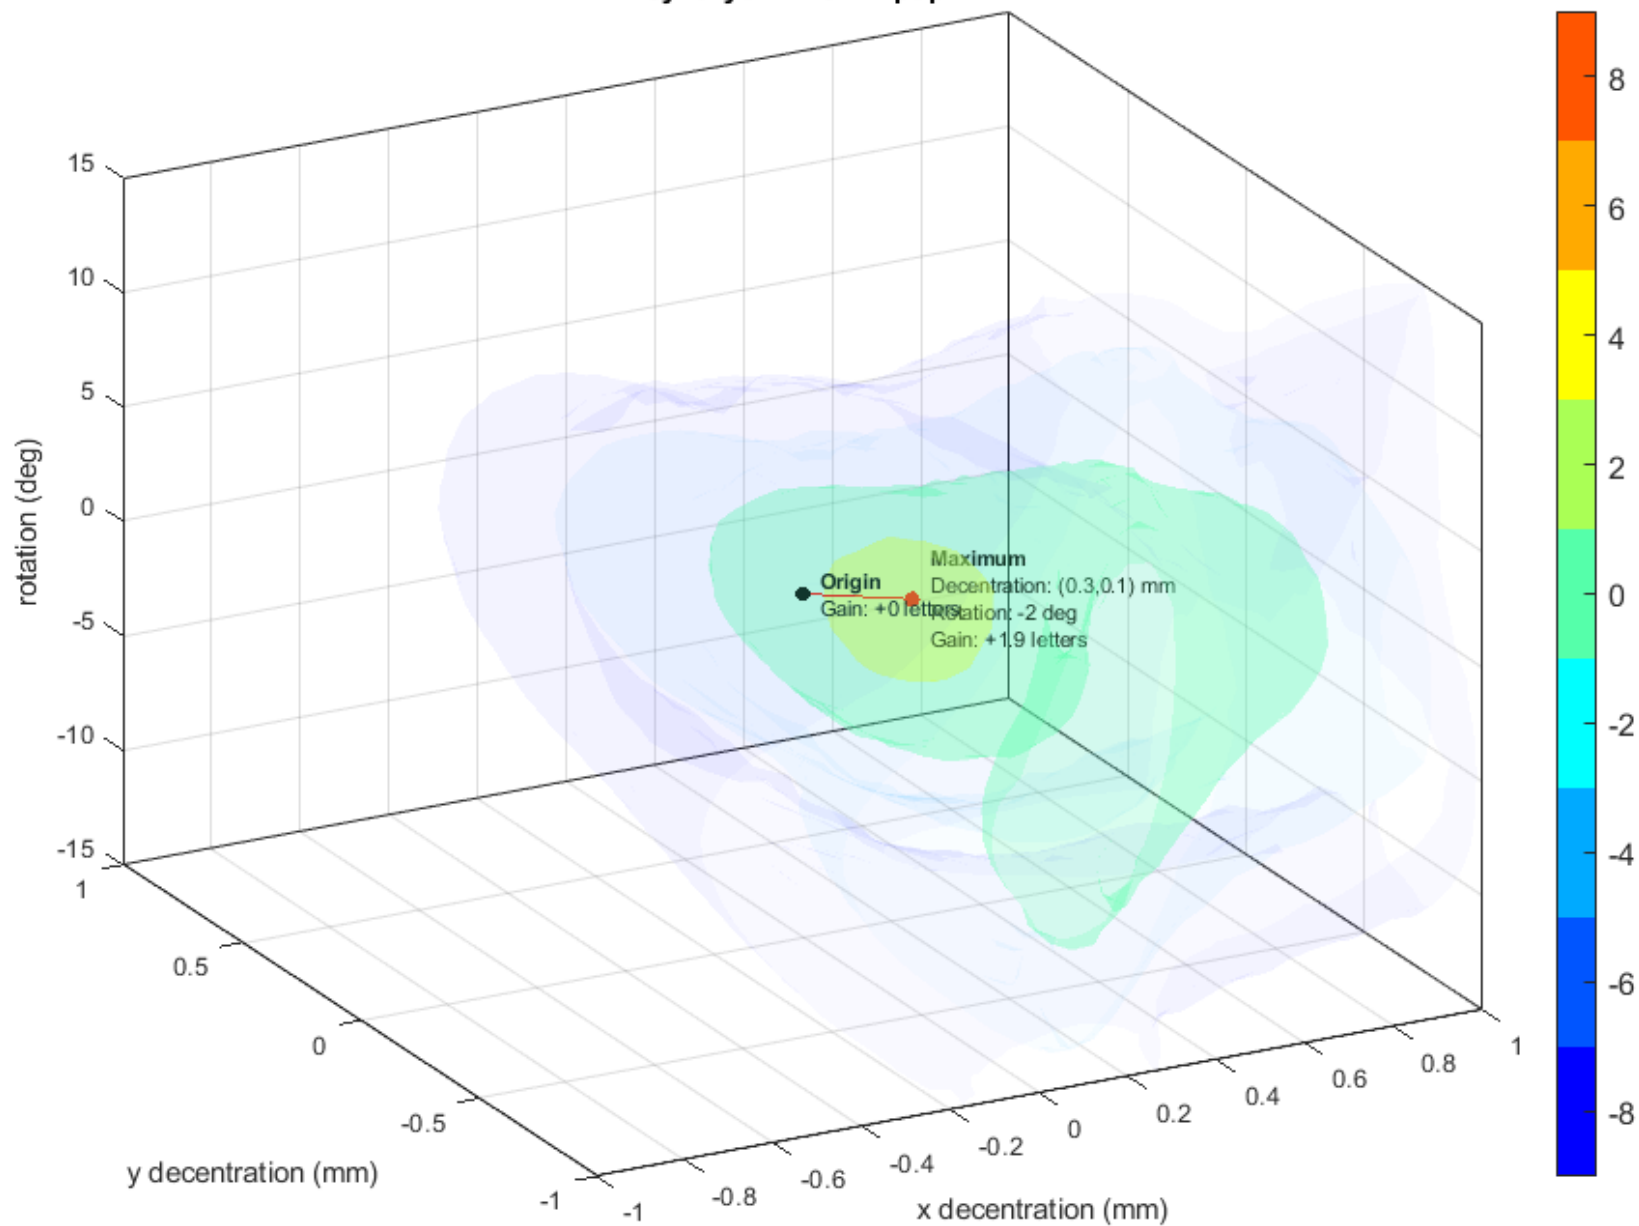

SyntEye 18 - 5mm pupil

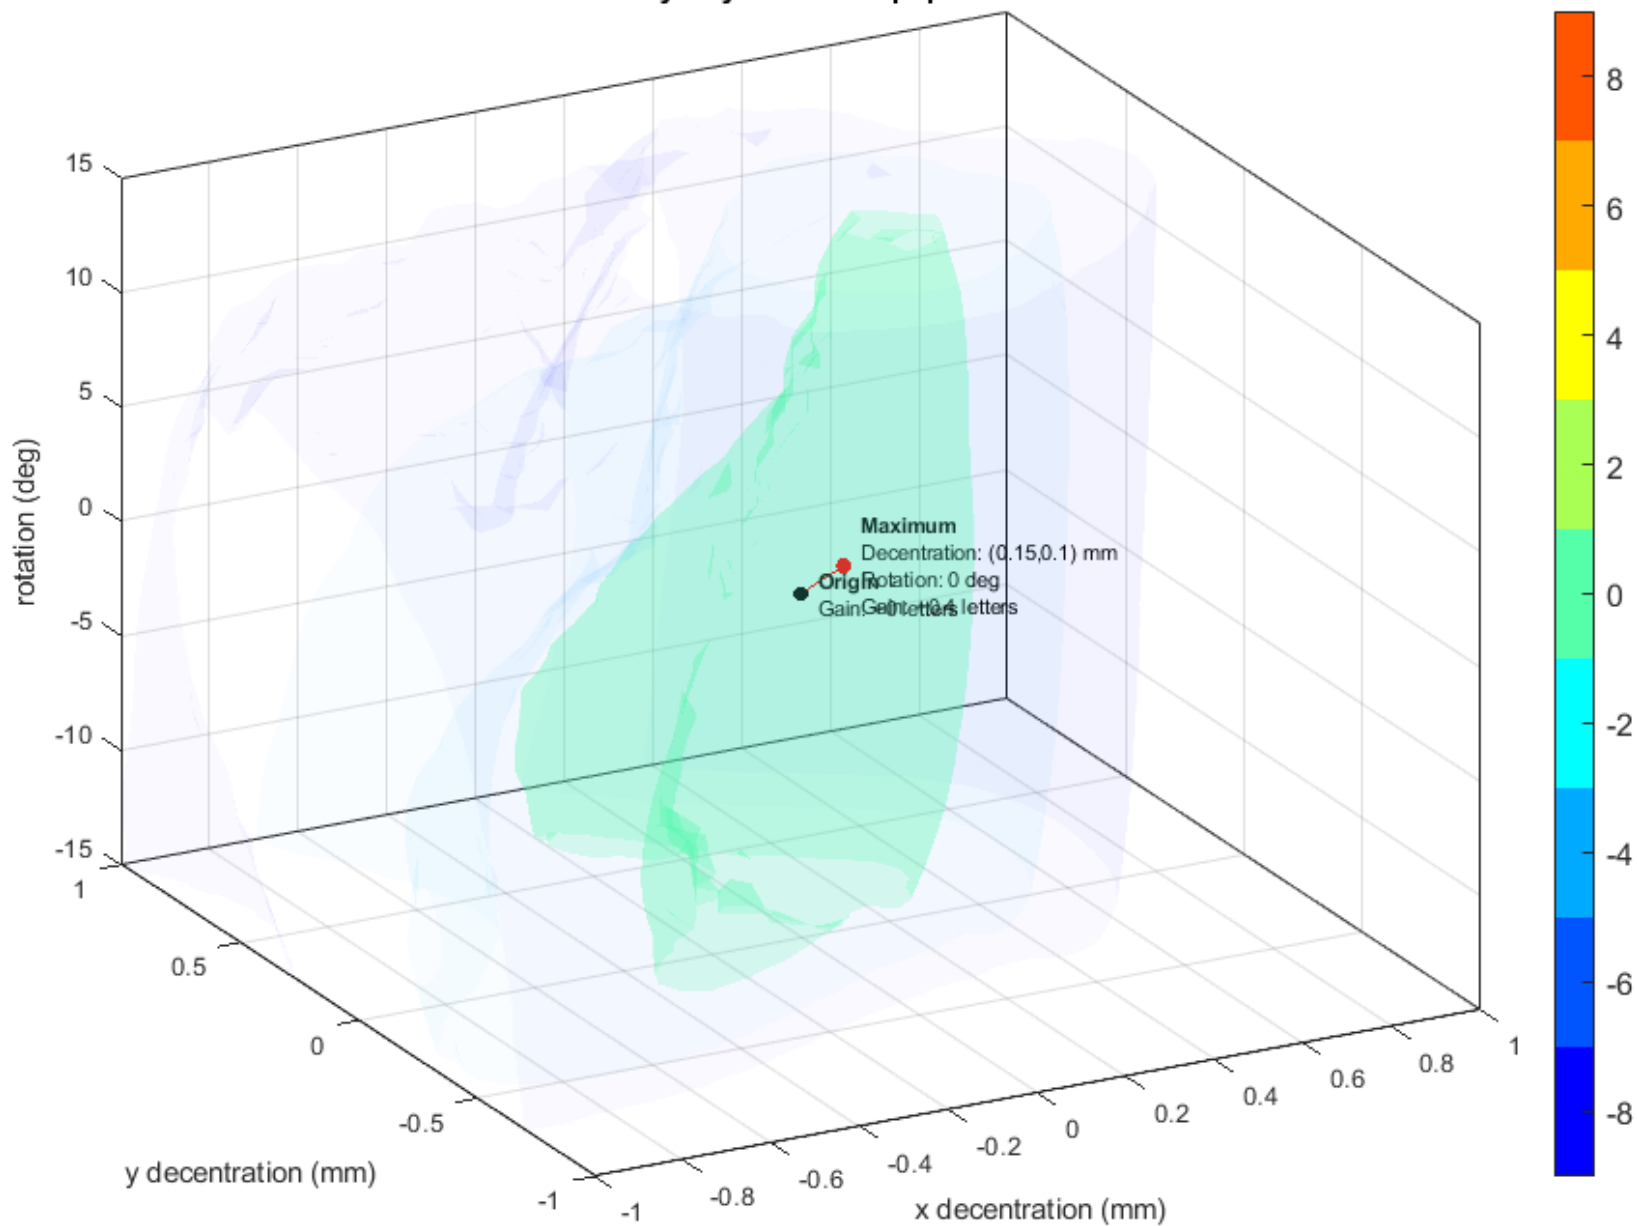

SyntEye 21 - 5mm pupil

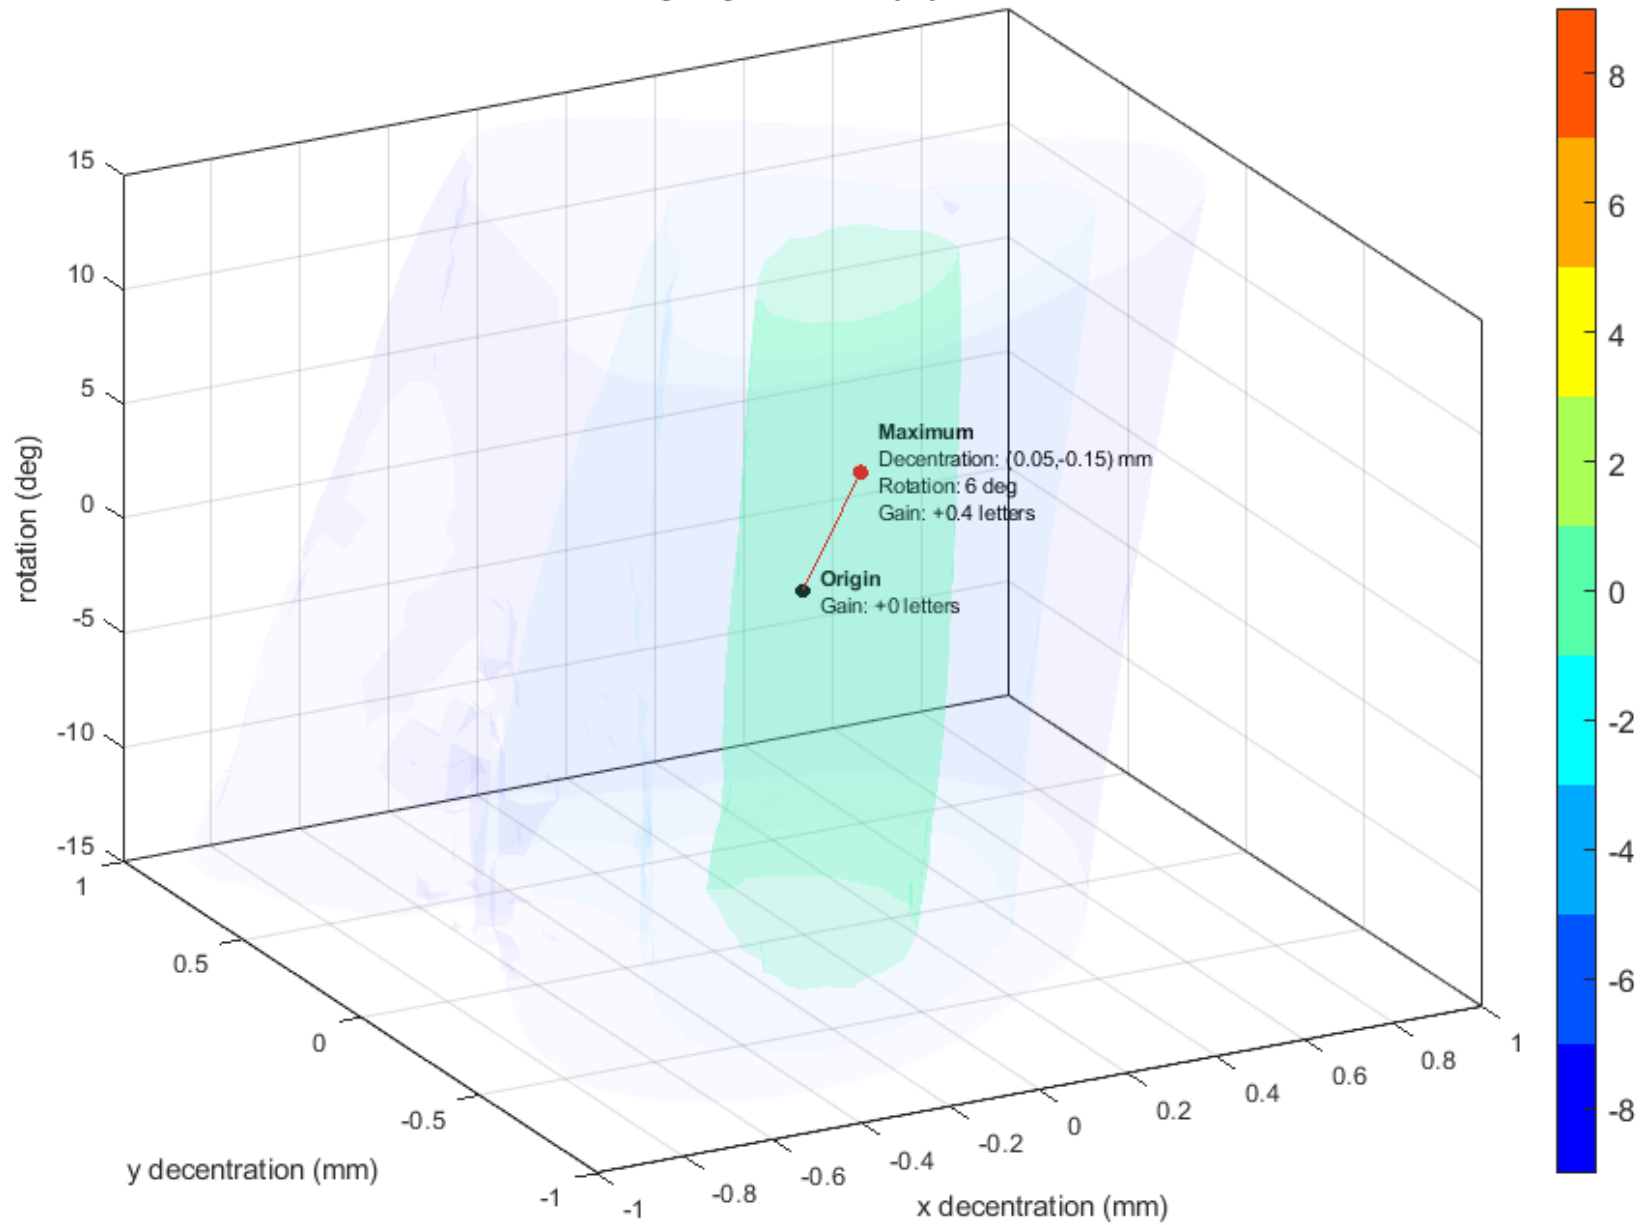

SyntEye 22 - 5mm pupil

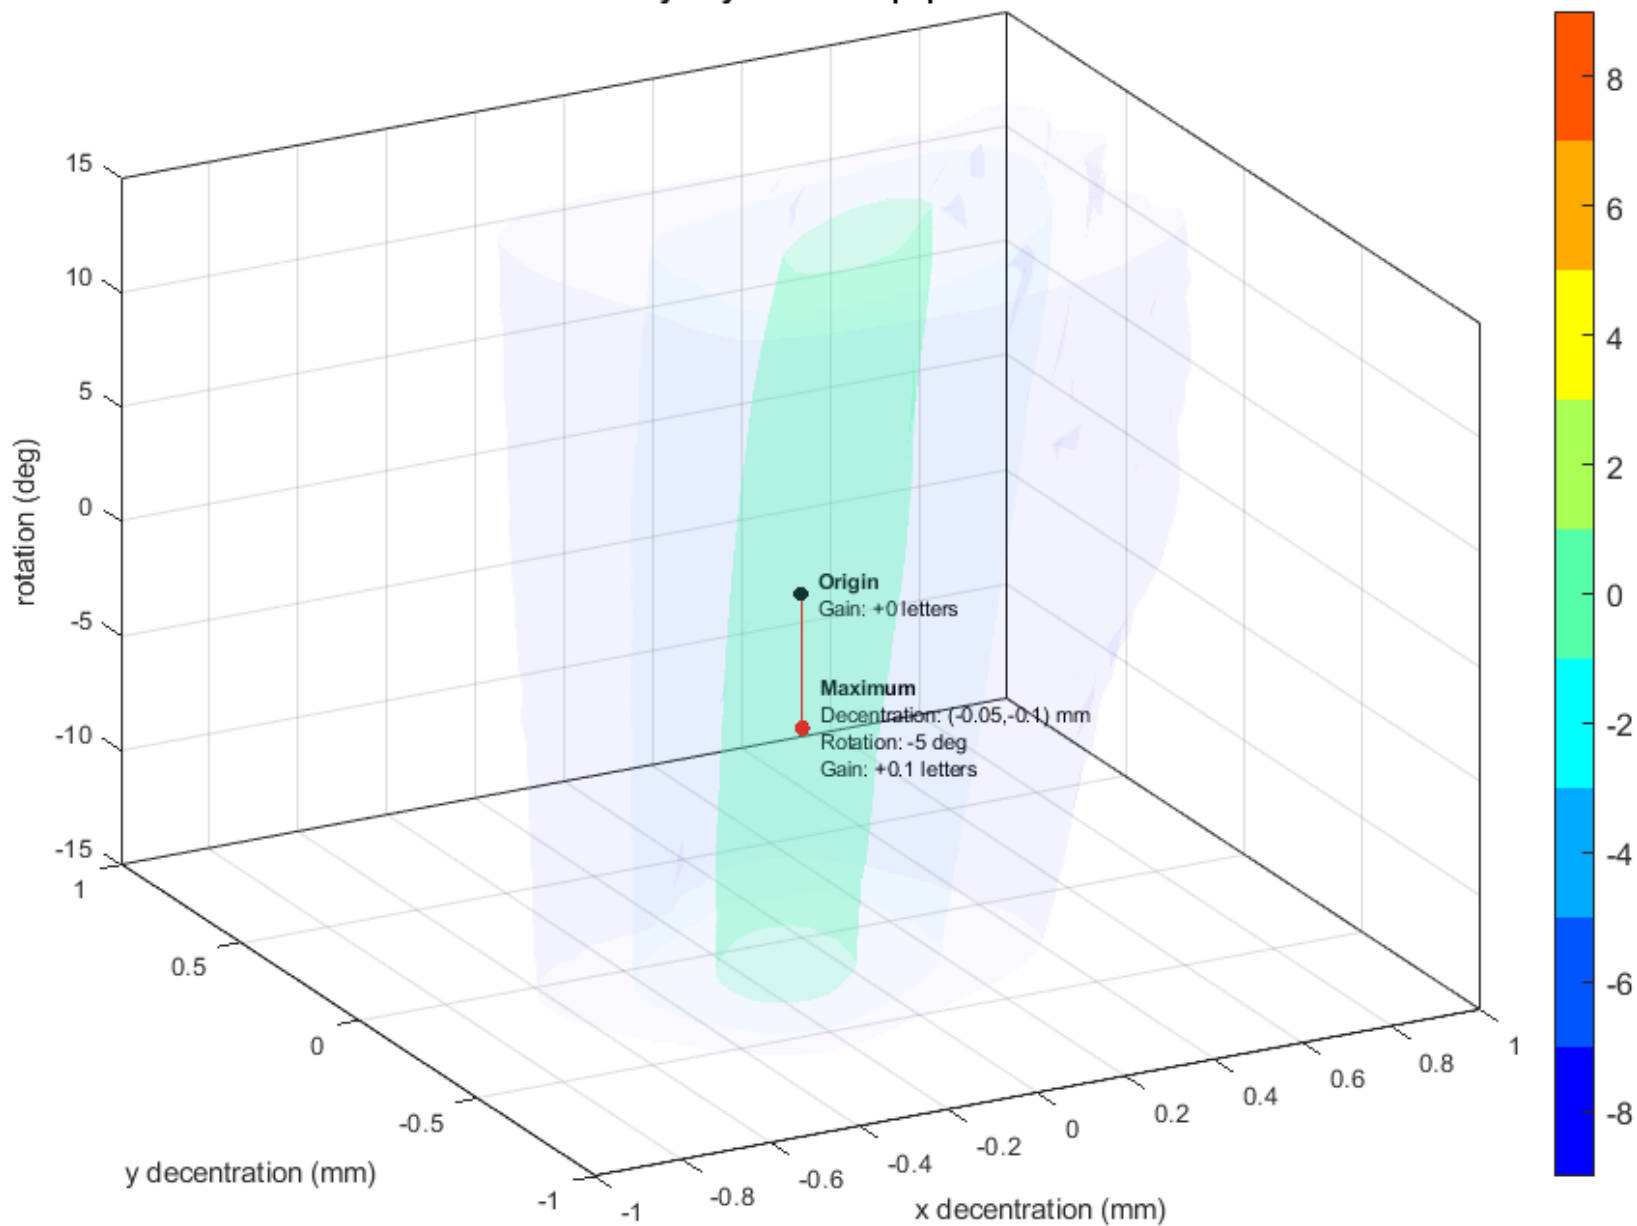



SyntEye 23 - 5mm pupil

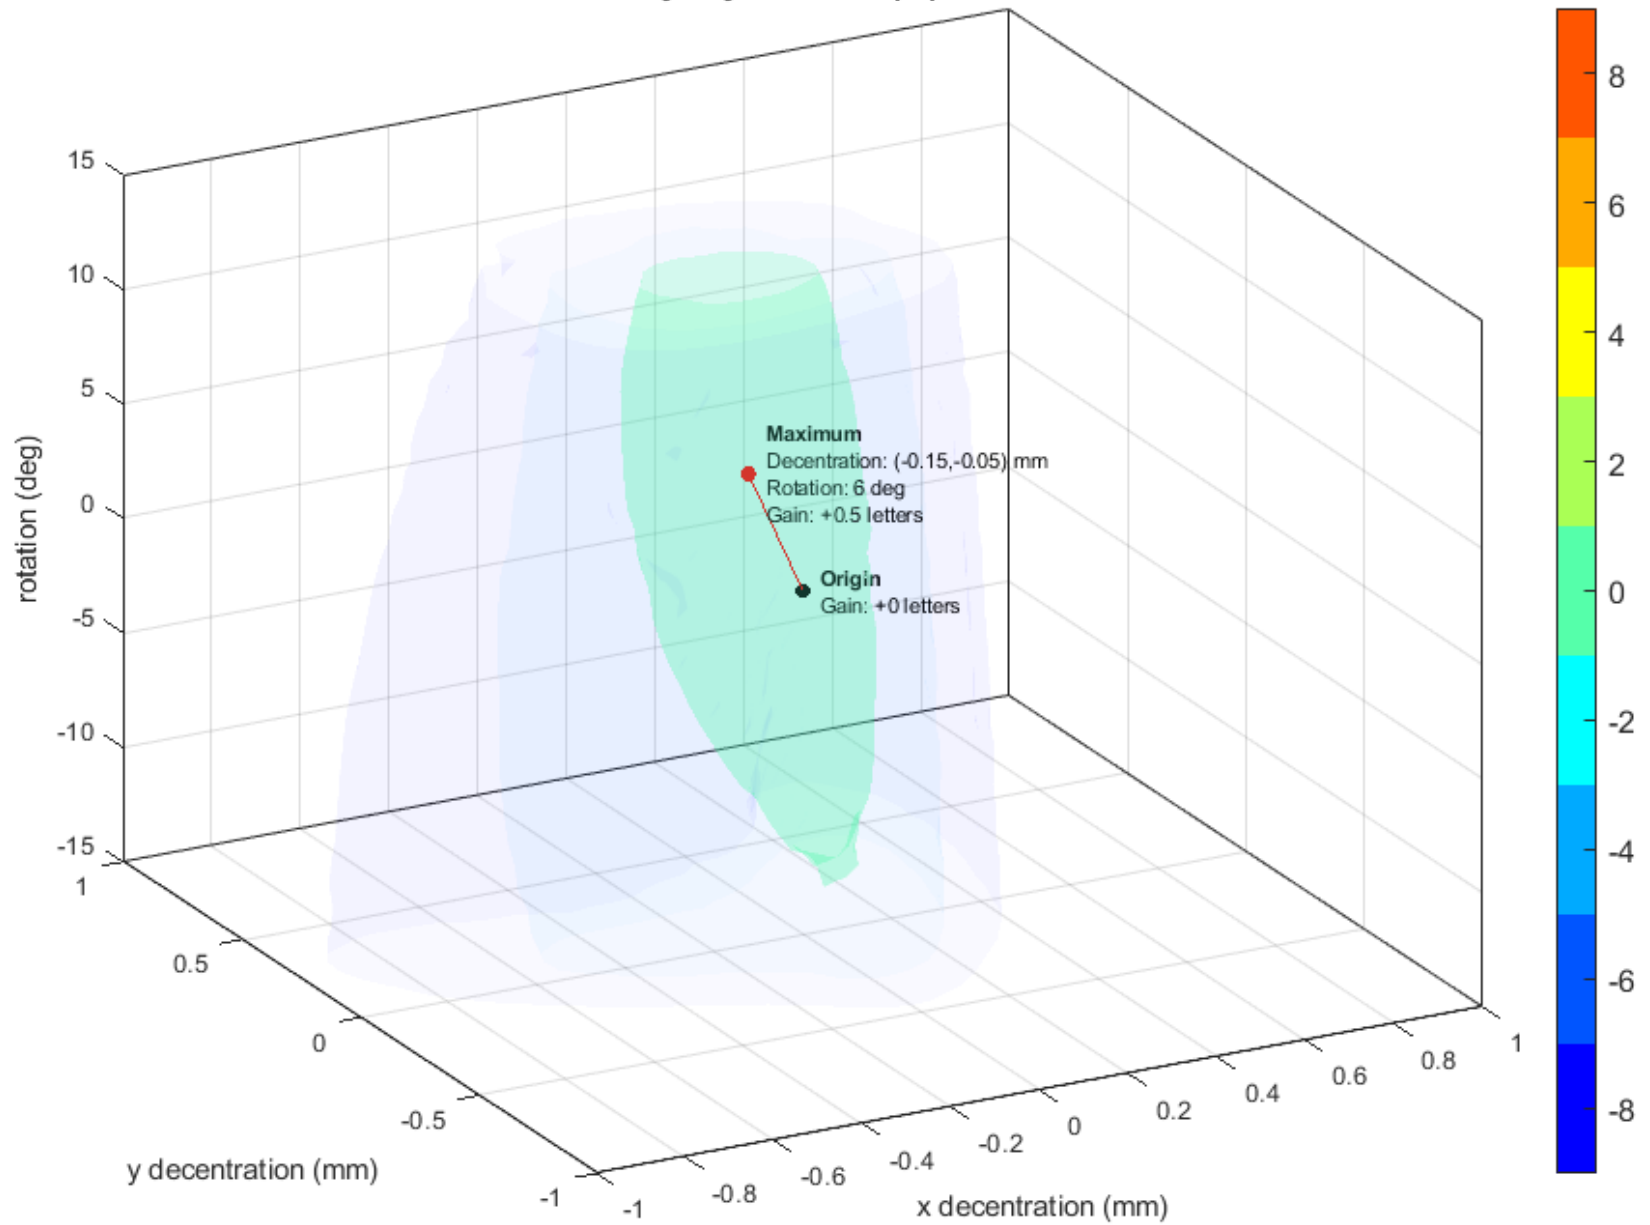

SyntEye 24 - 5mm pupil

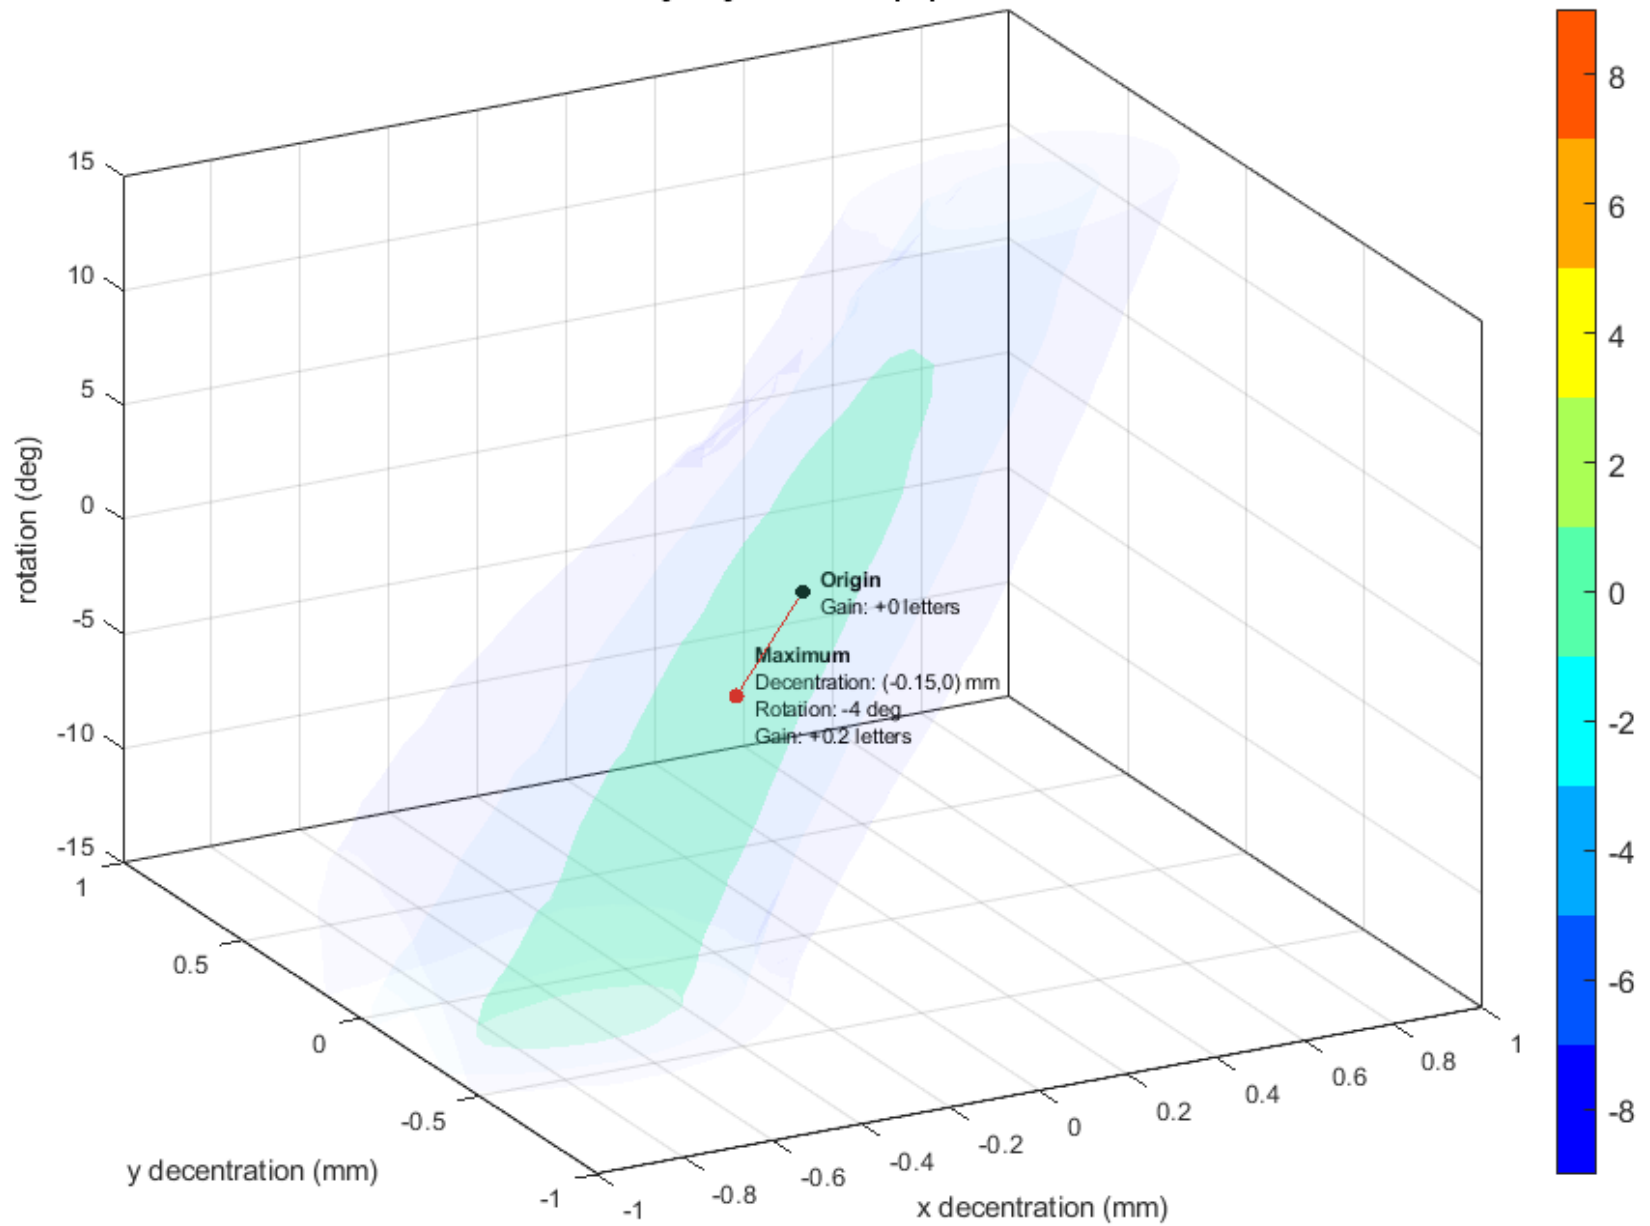

SyntEye 26 - 5mm pupil

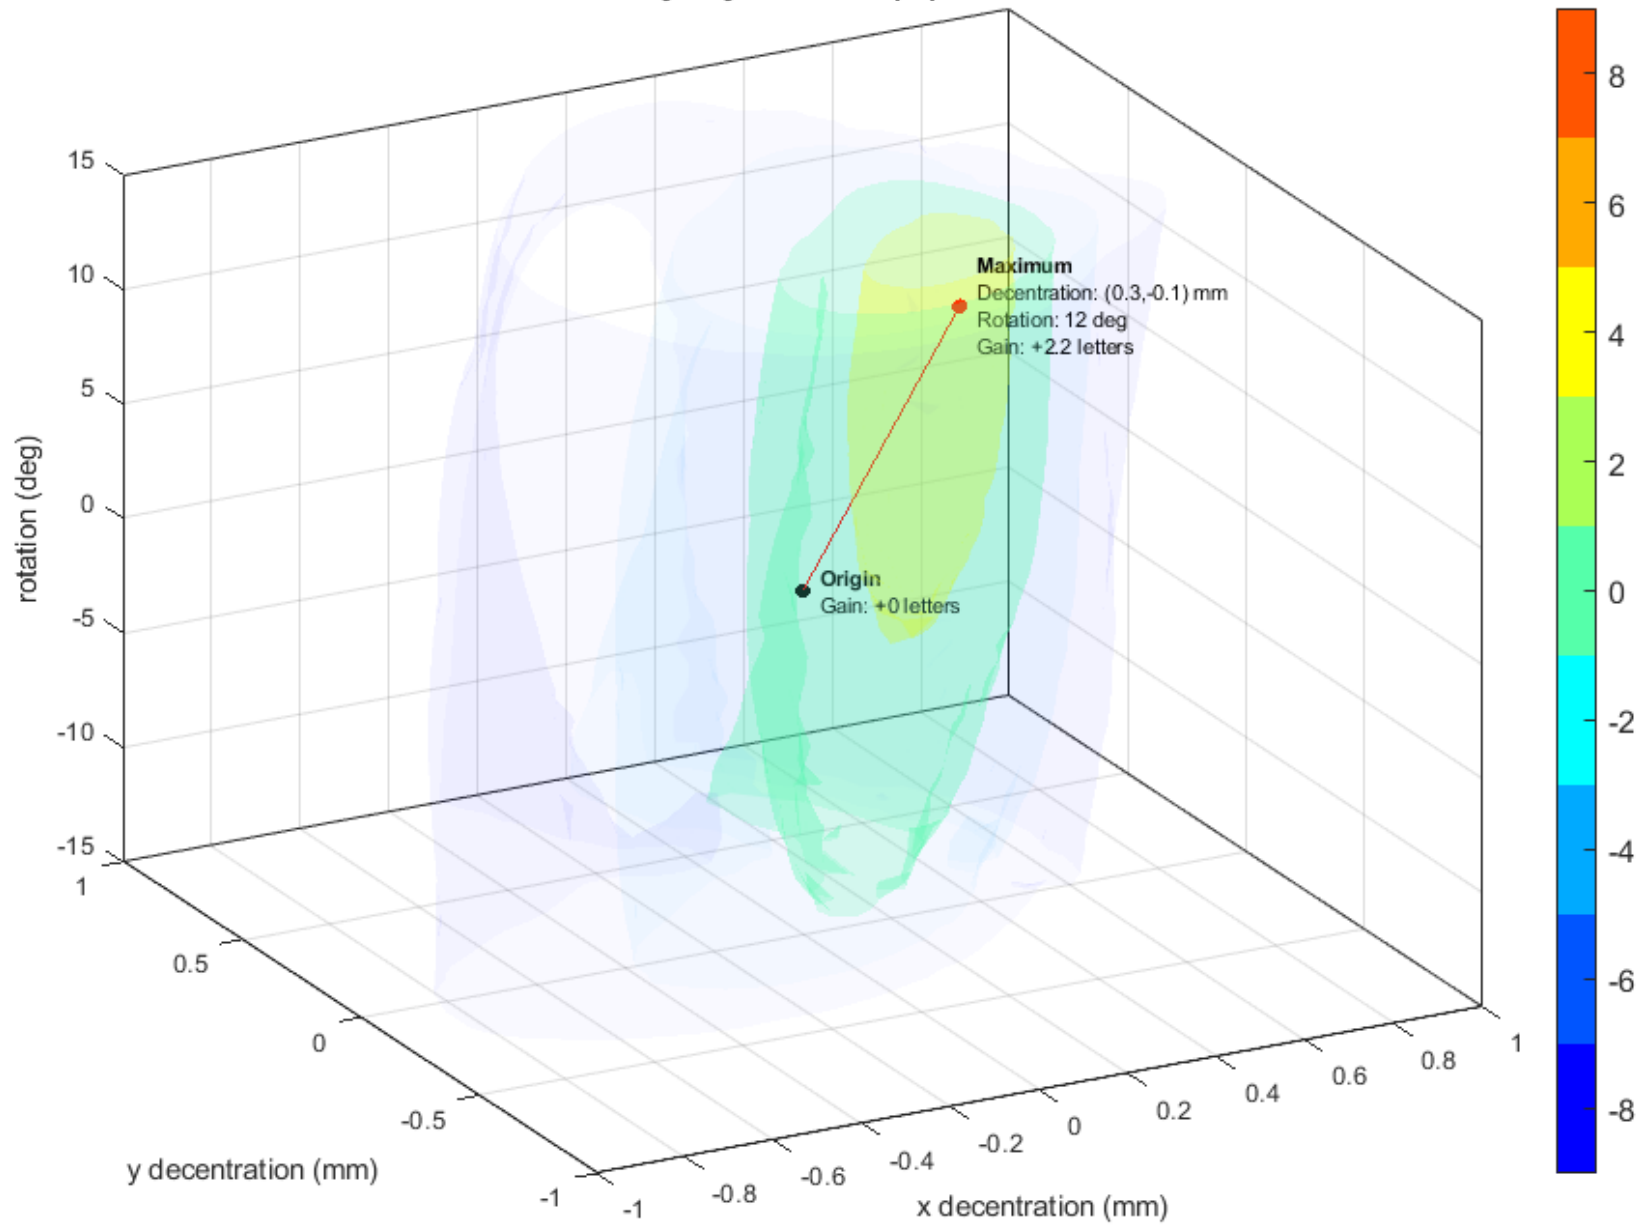

SyntEye 27 - 5mm pupil

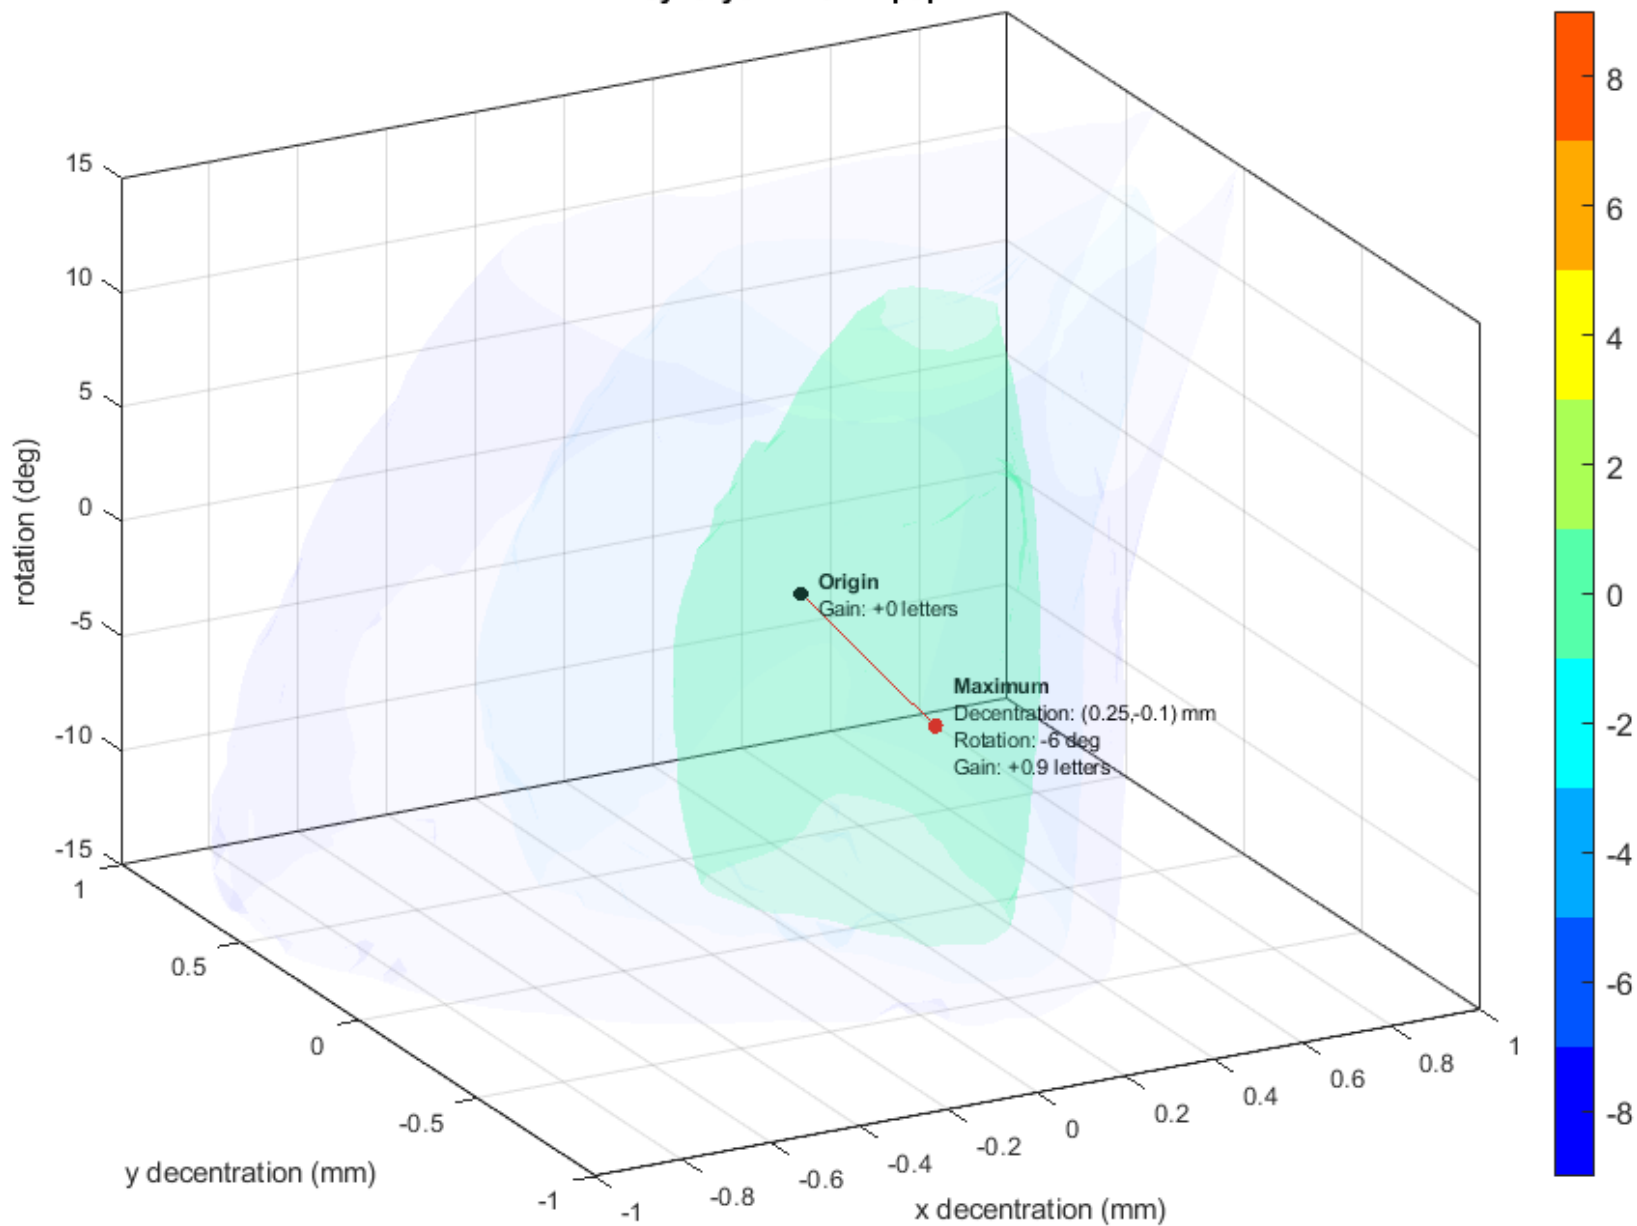

SyntEye 28 - 5mm pupil

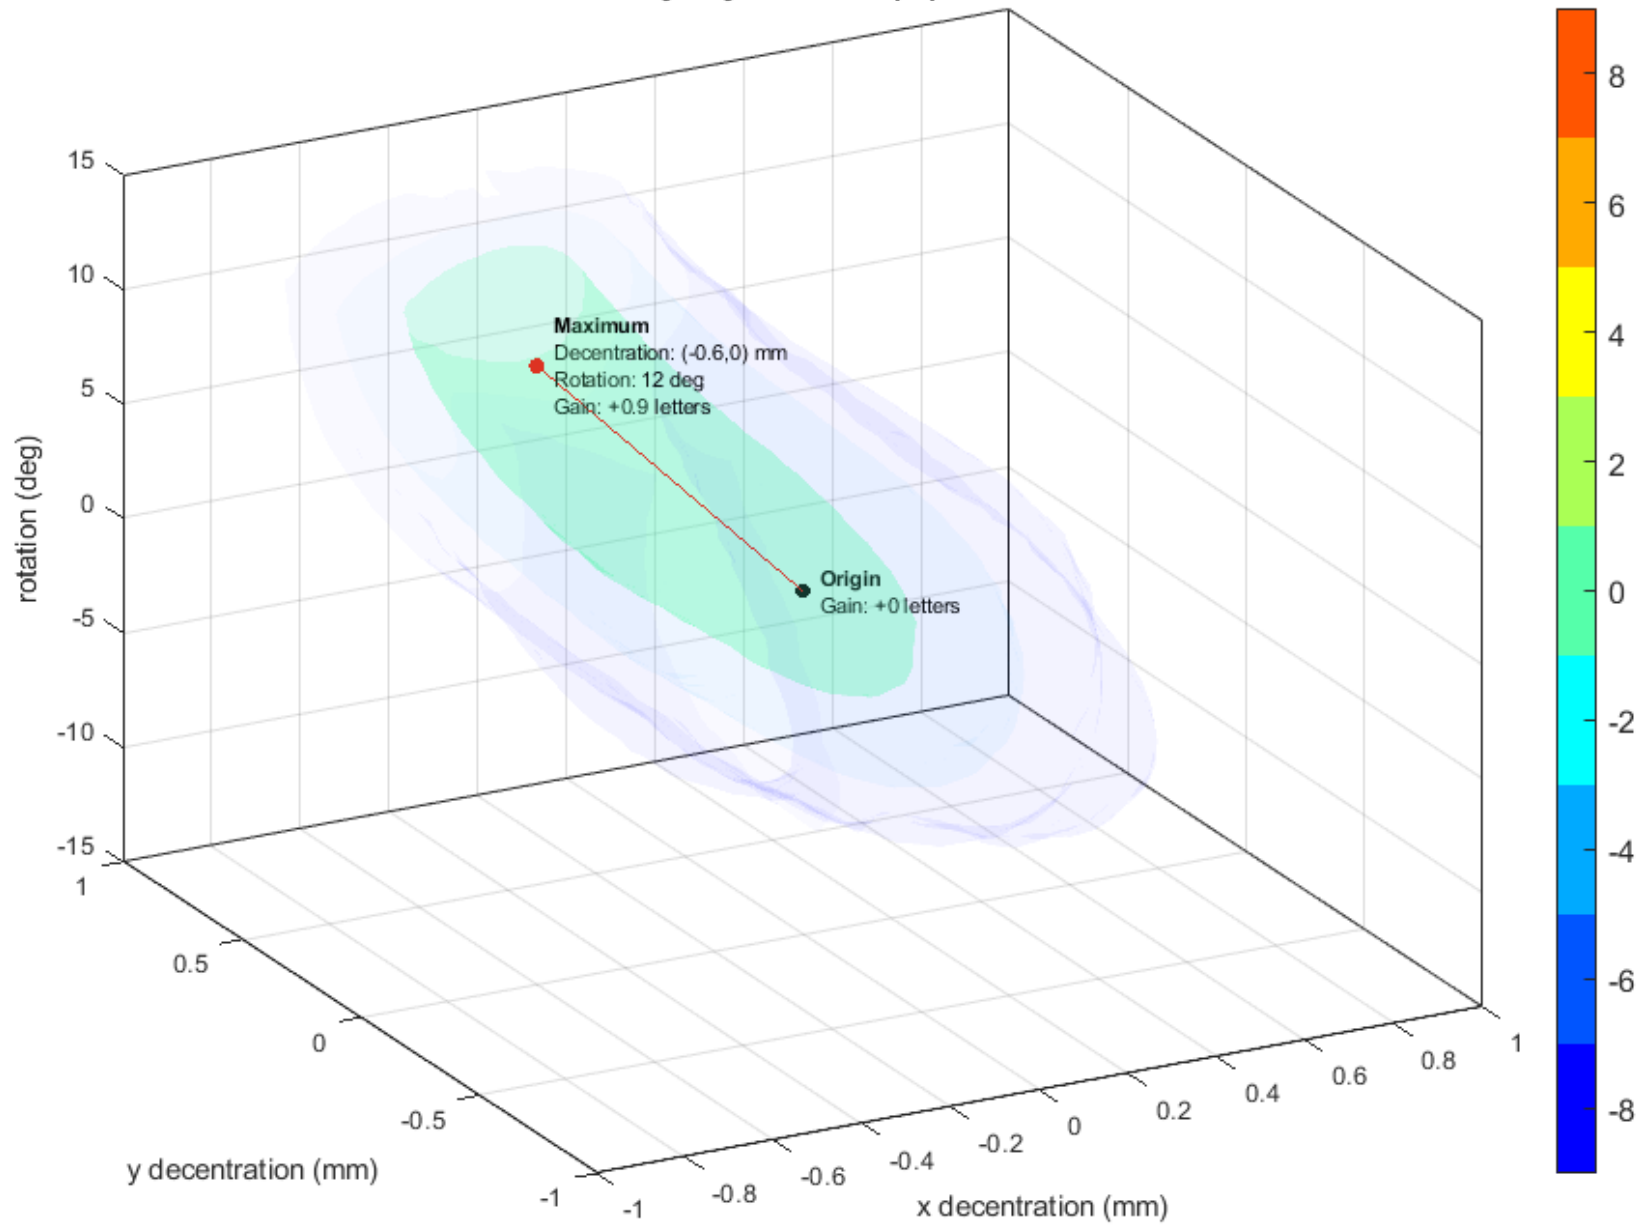

Normal SyntEyes

SyntEye 1 - 5mm pupil

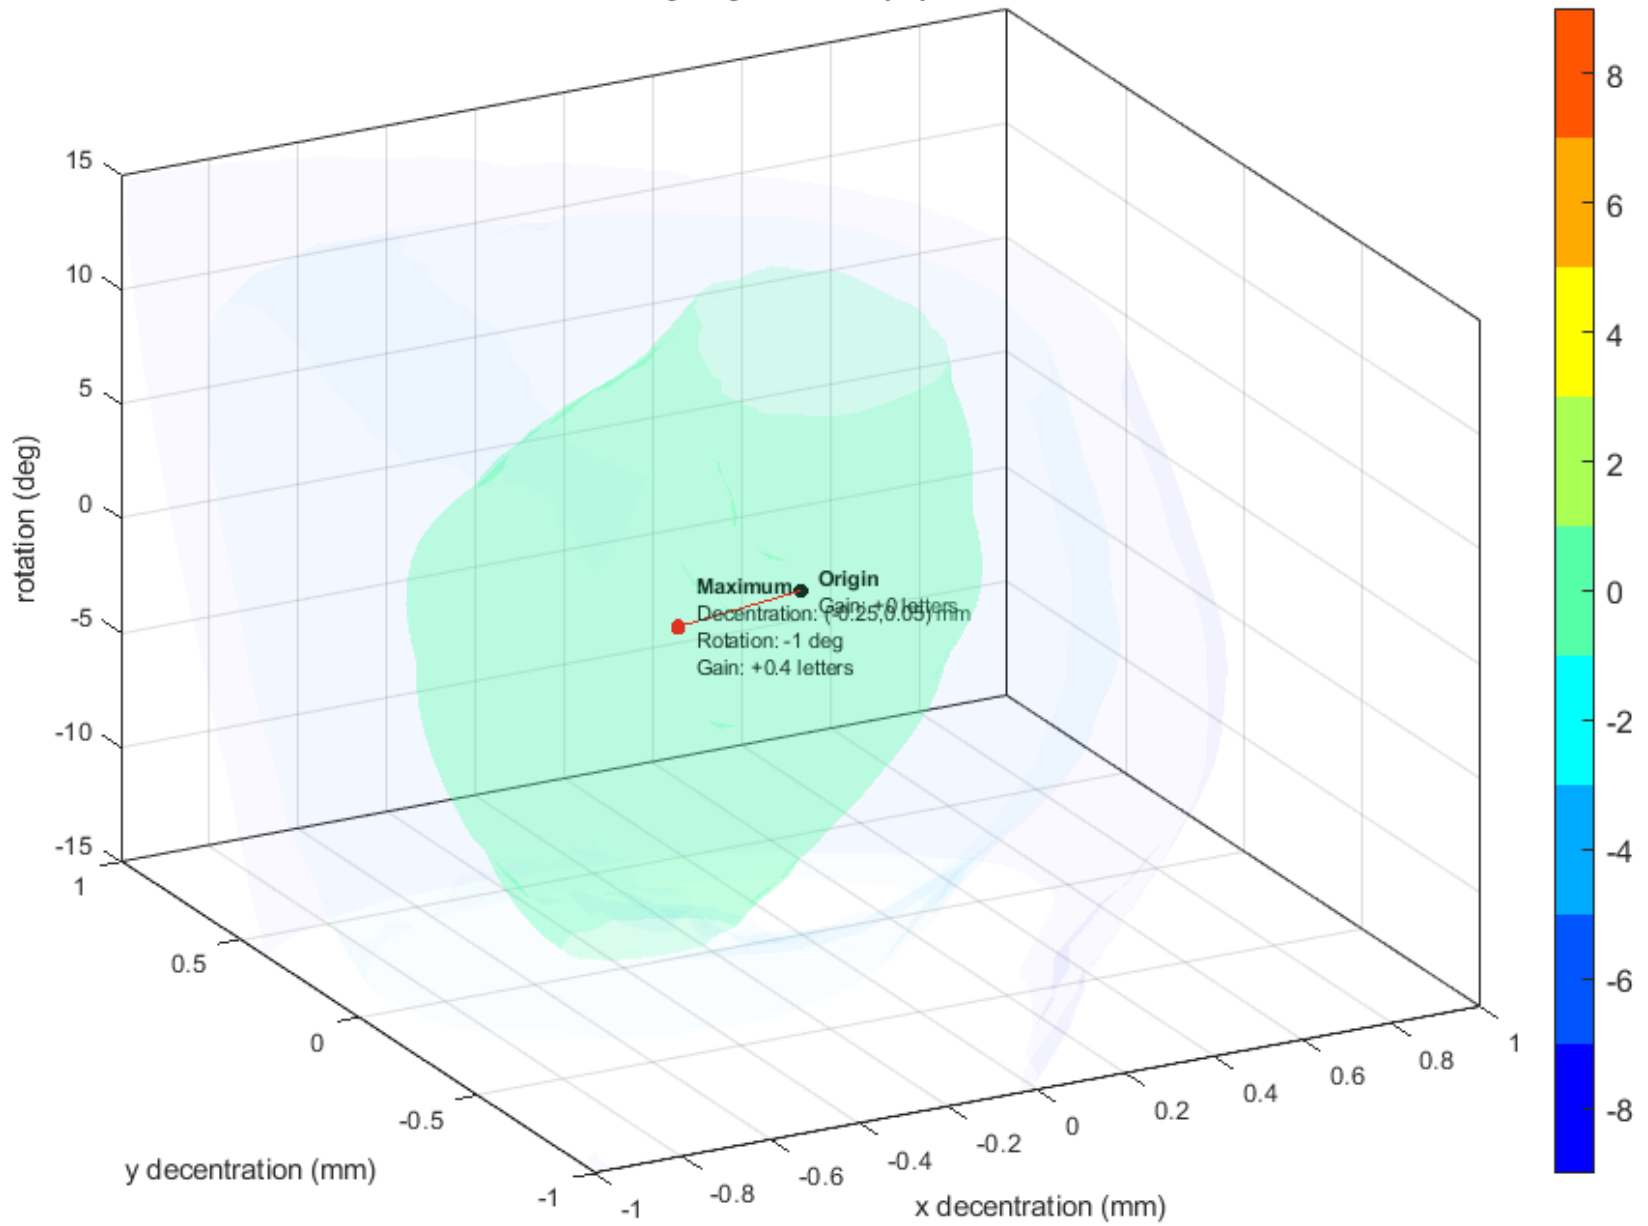

SyntEye 2 - 5mm pupil

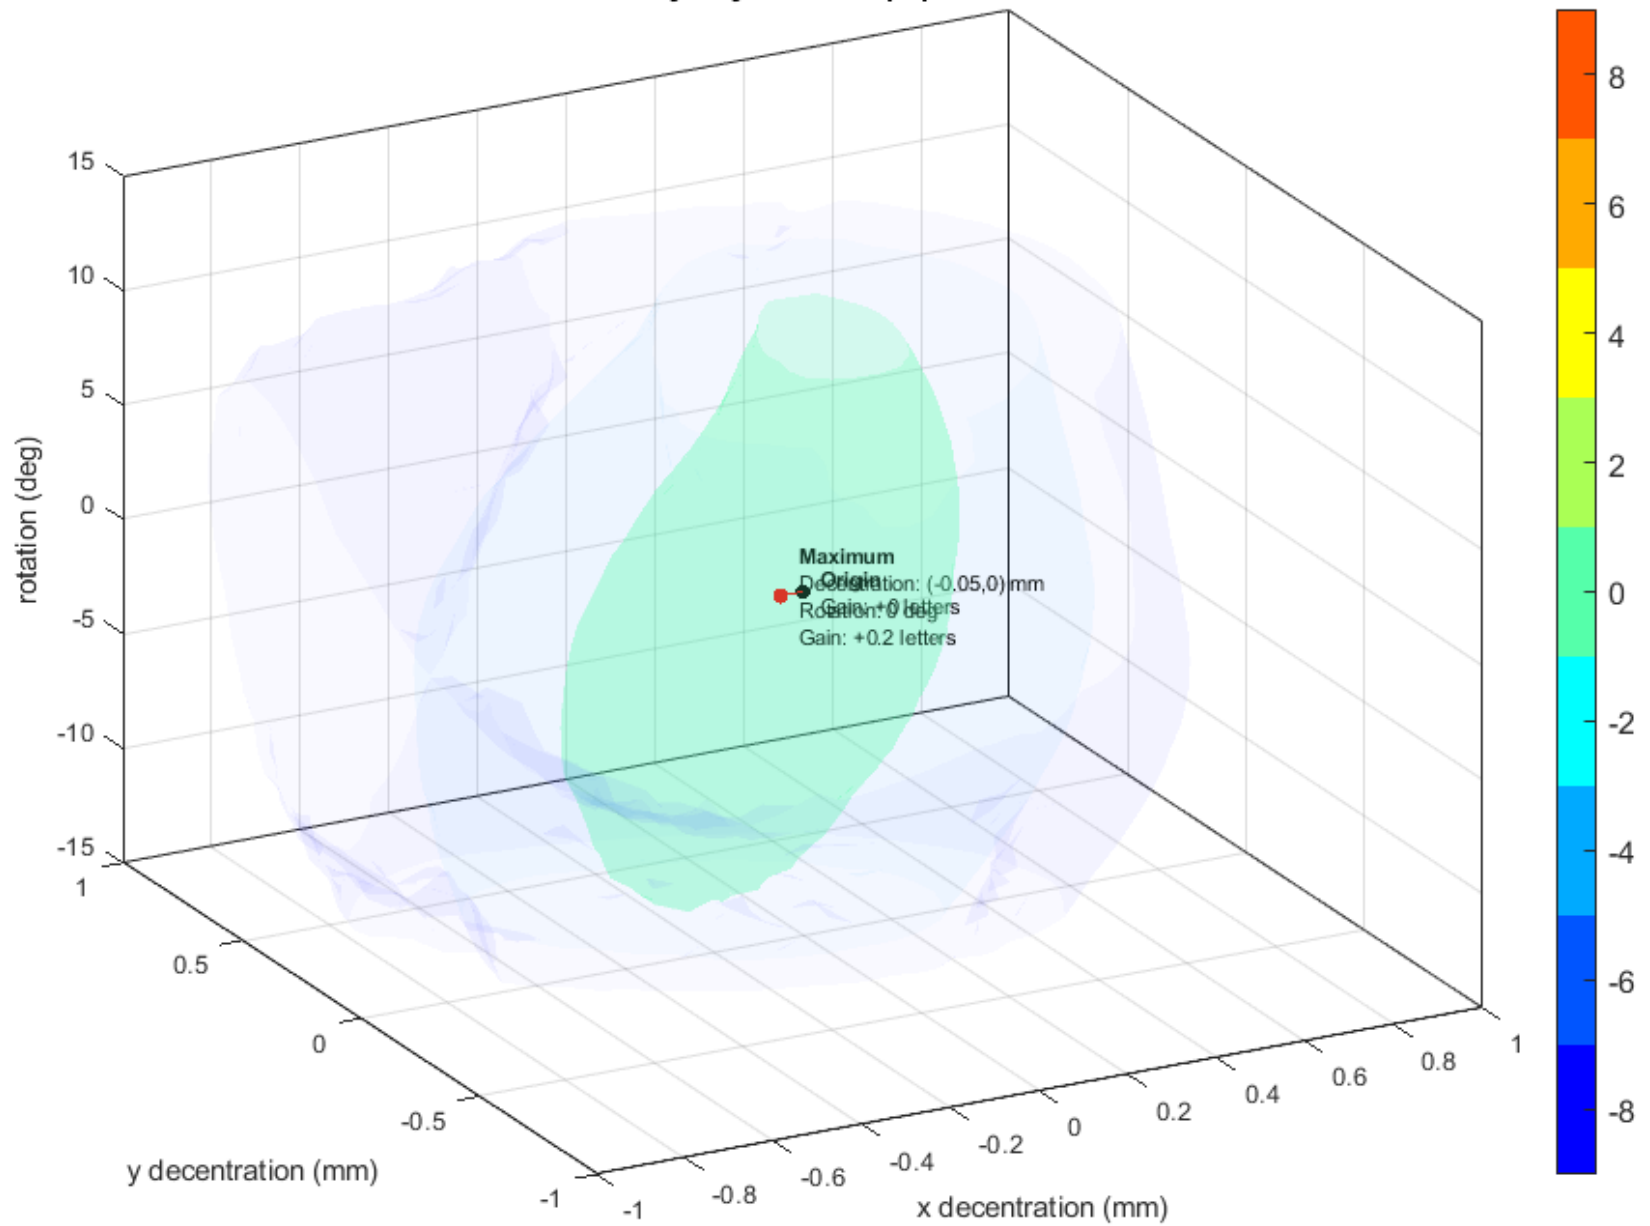



SyntEye 3 - 5mm pupil

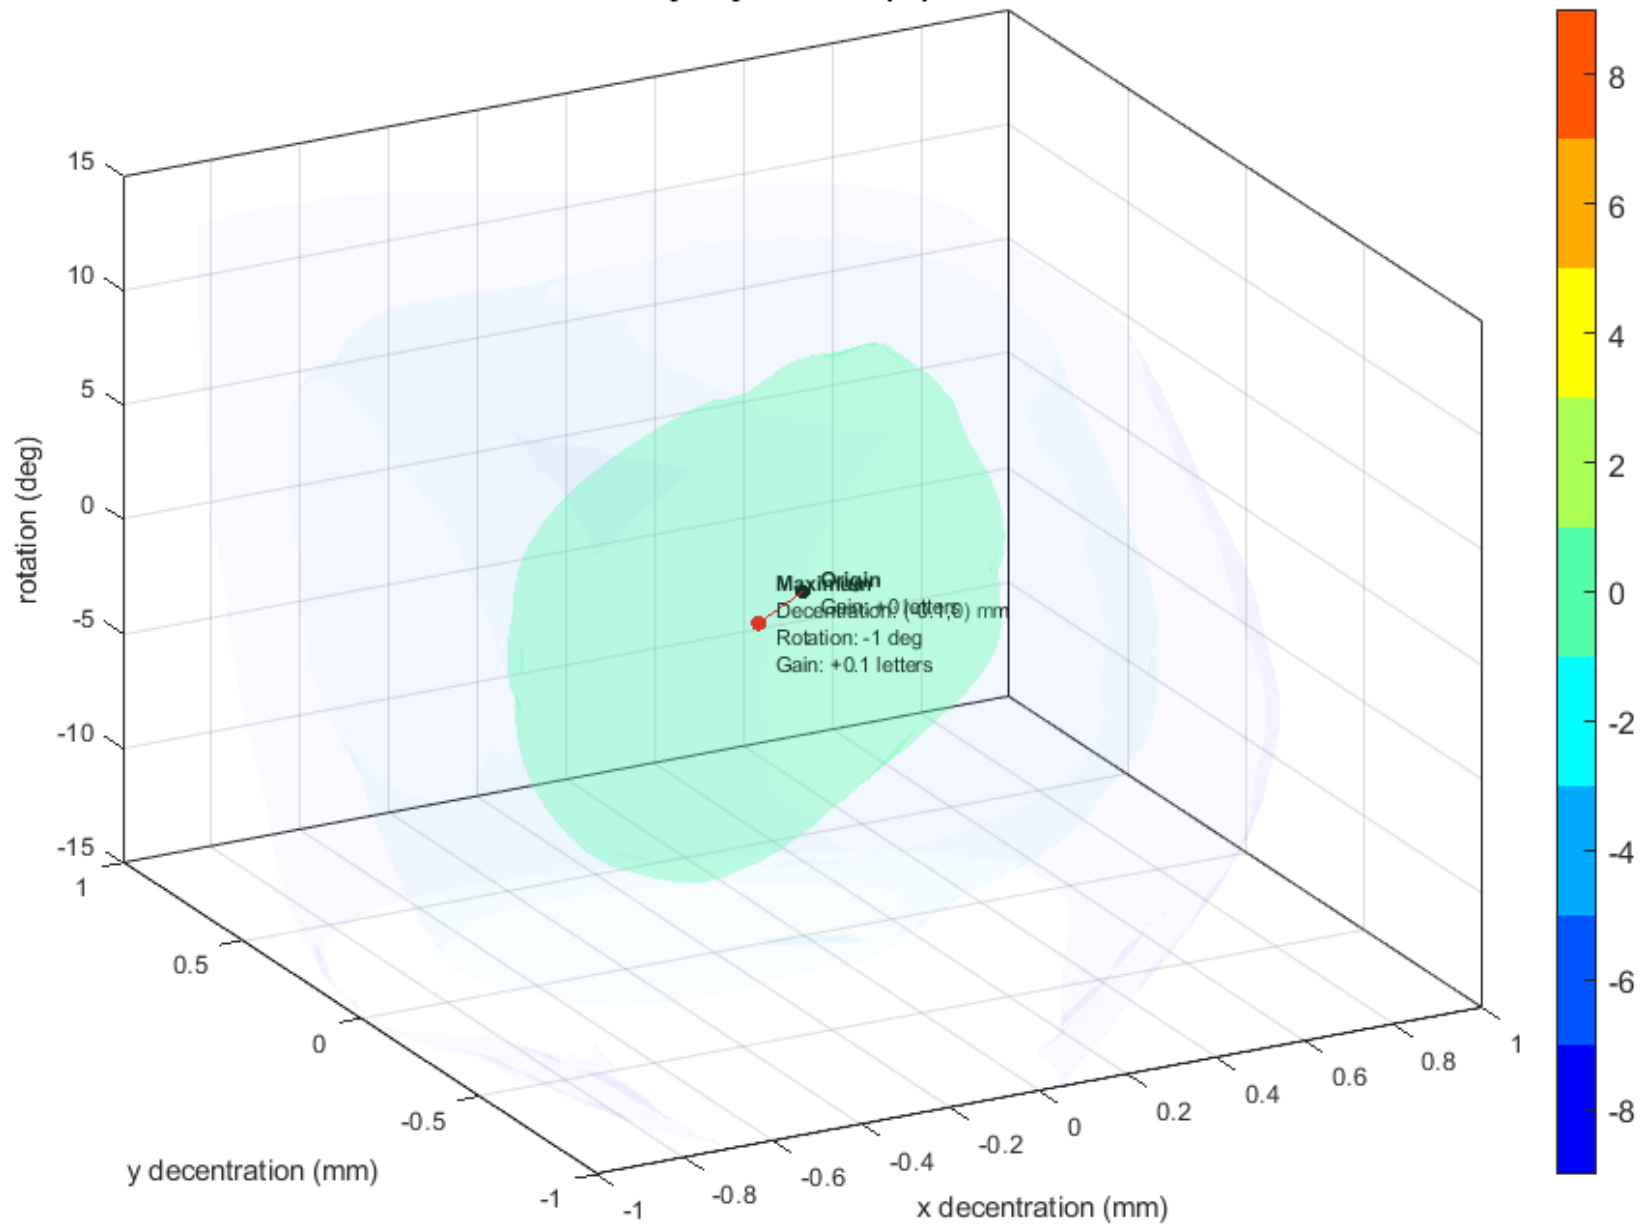

SyntEye 4 - 5mm pupil

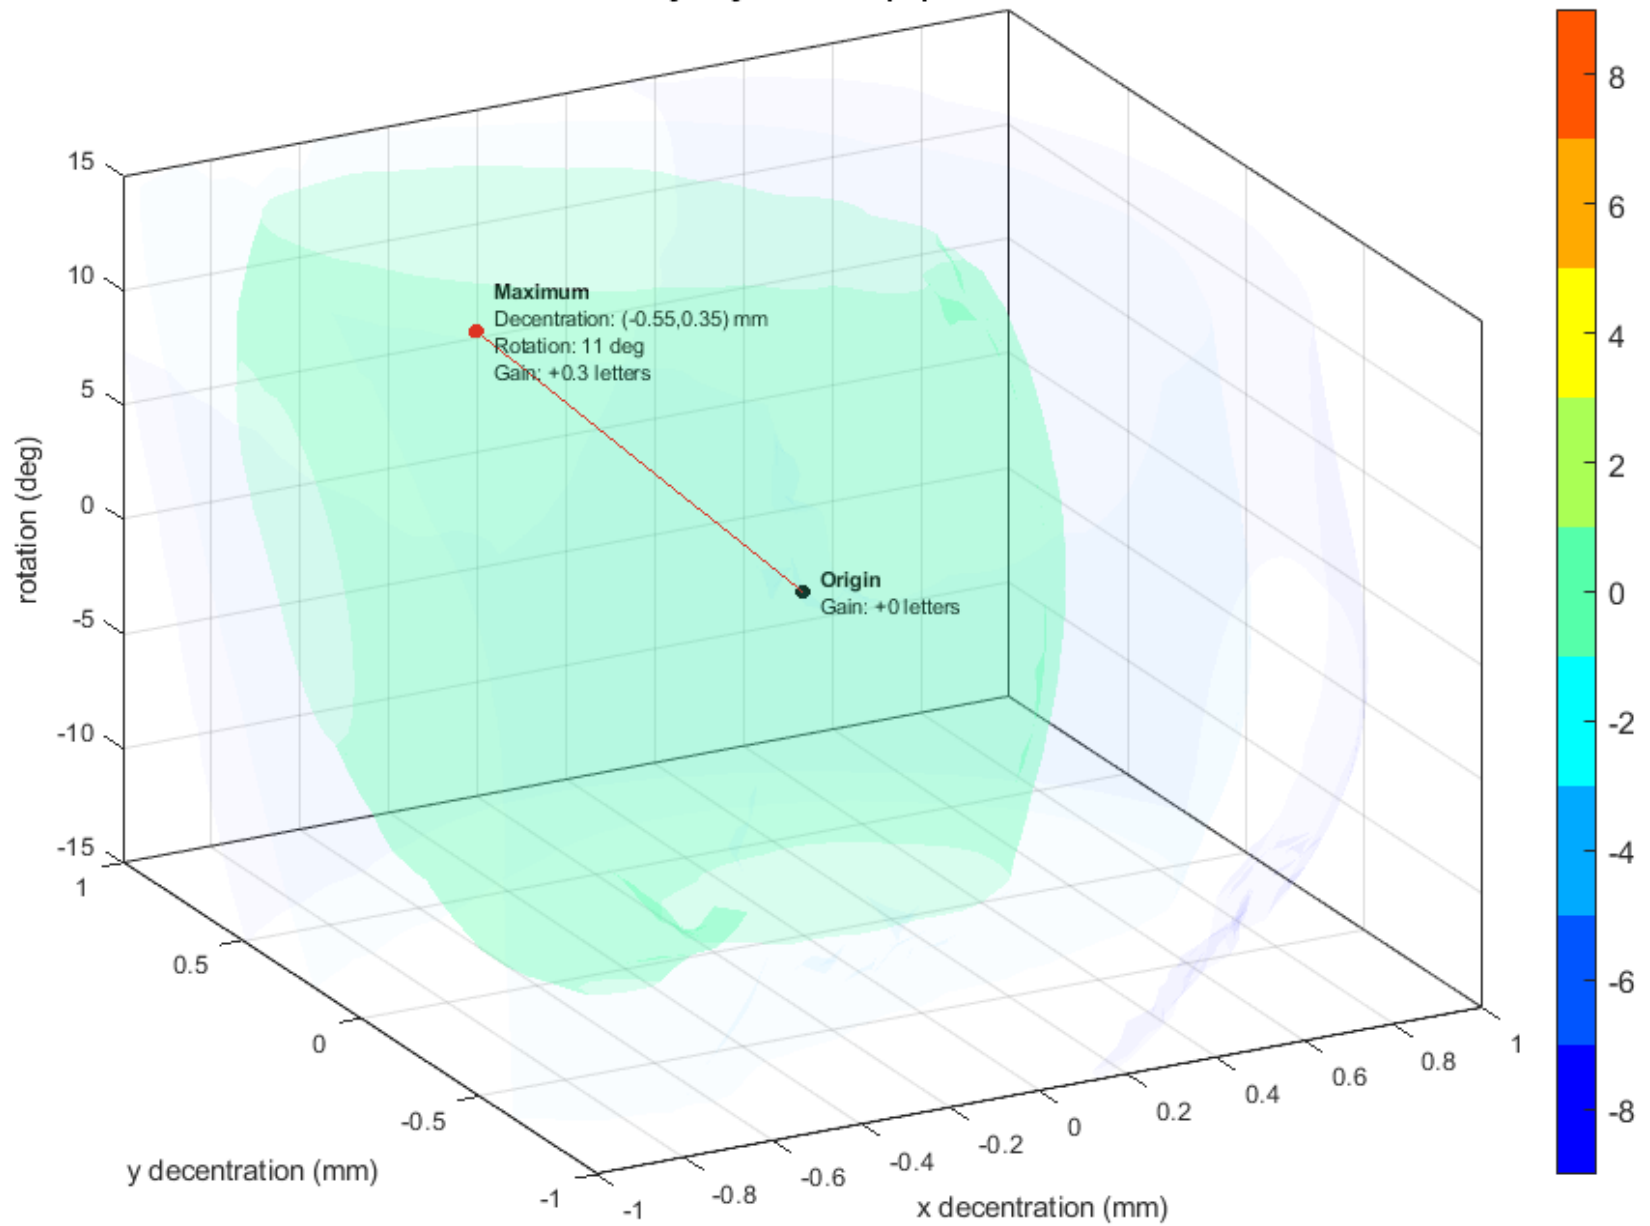

SyntEye 5 - 5mm pupil

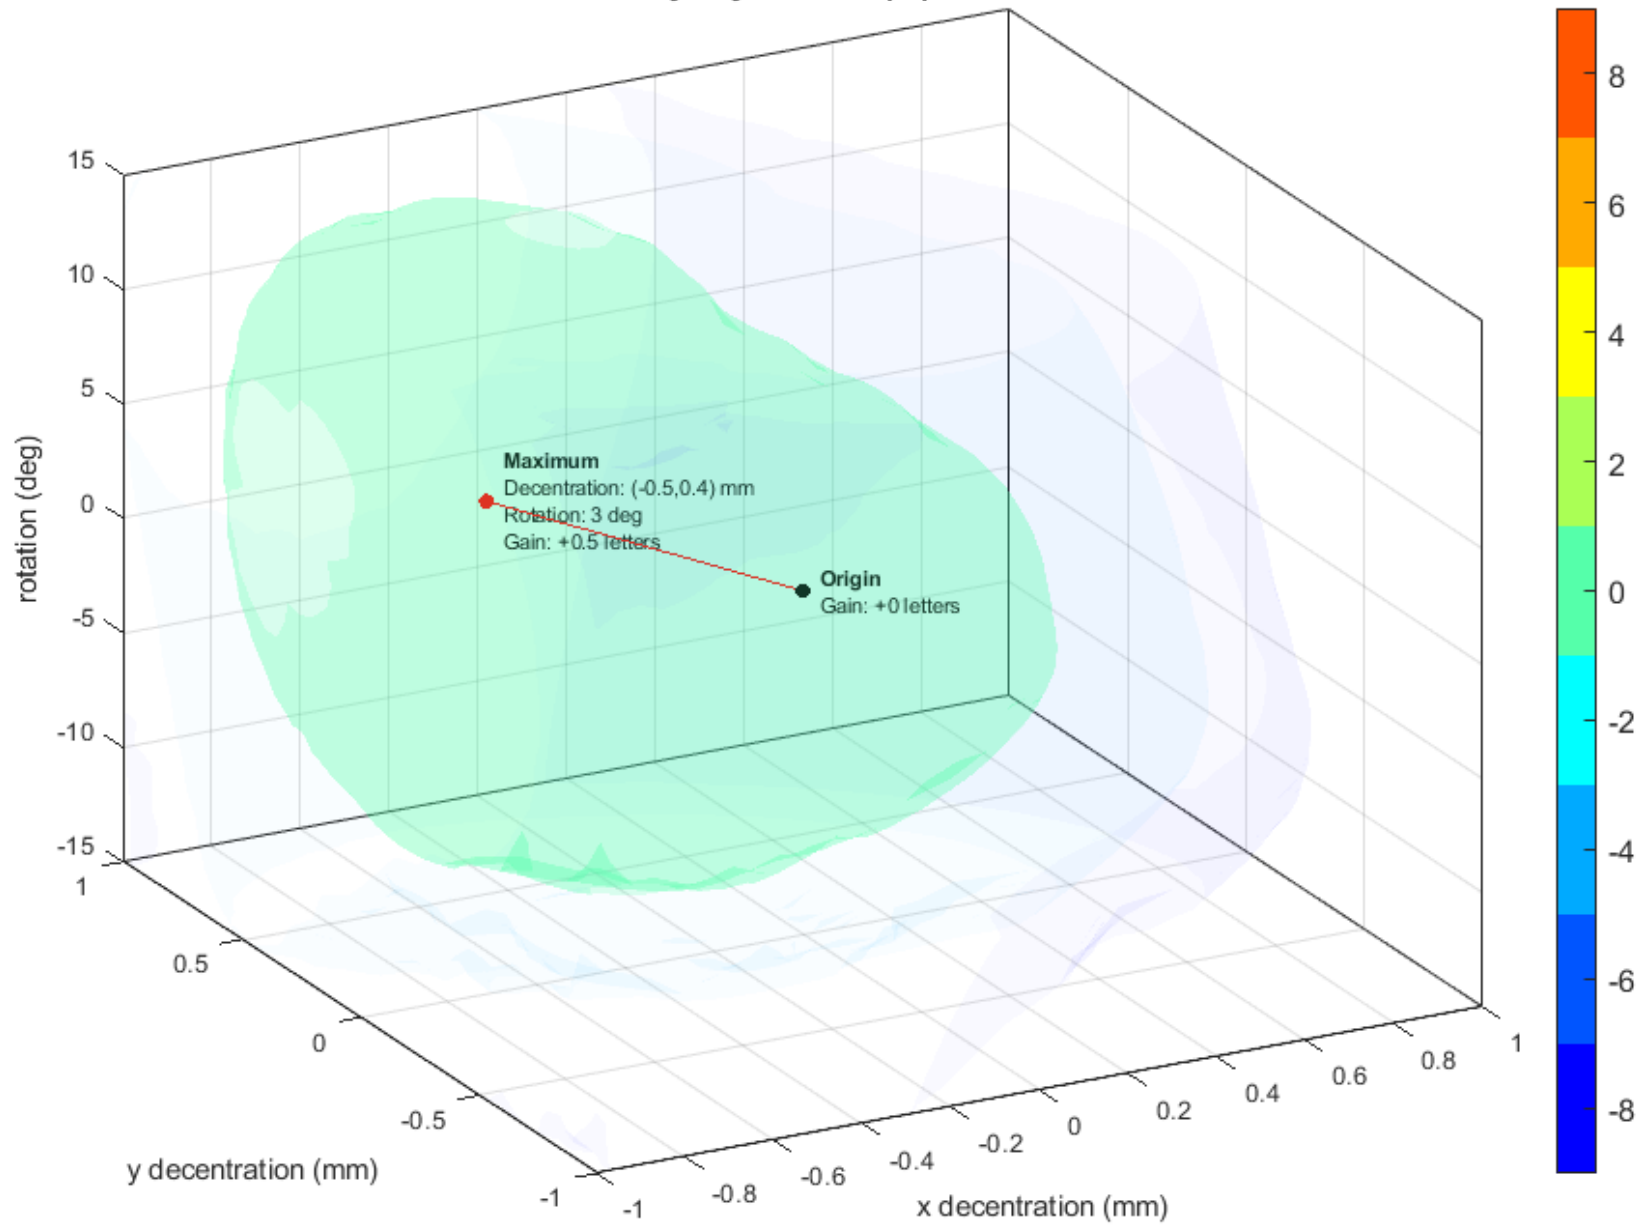

SyntEye 6 - 5mm pupil

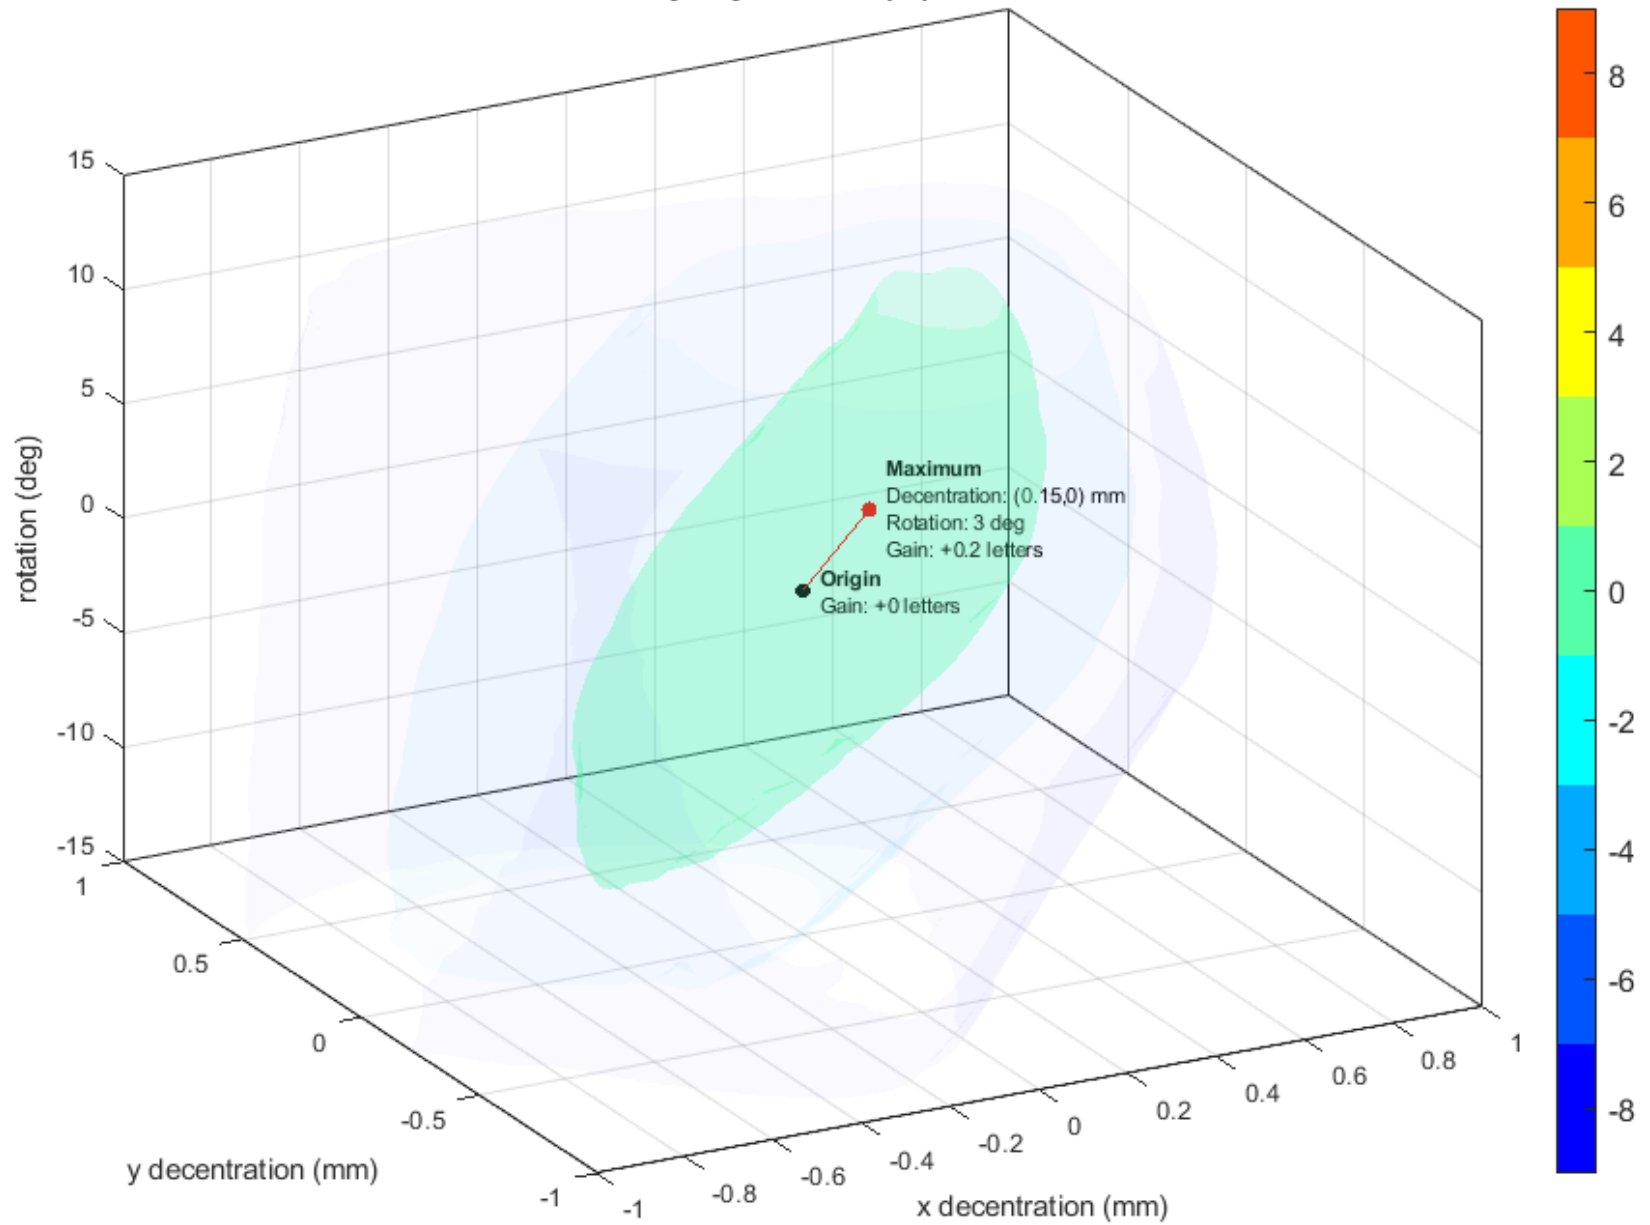

SyntEye 7 - 5mm pupil

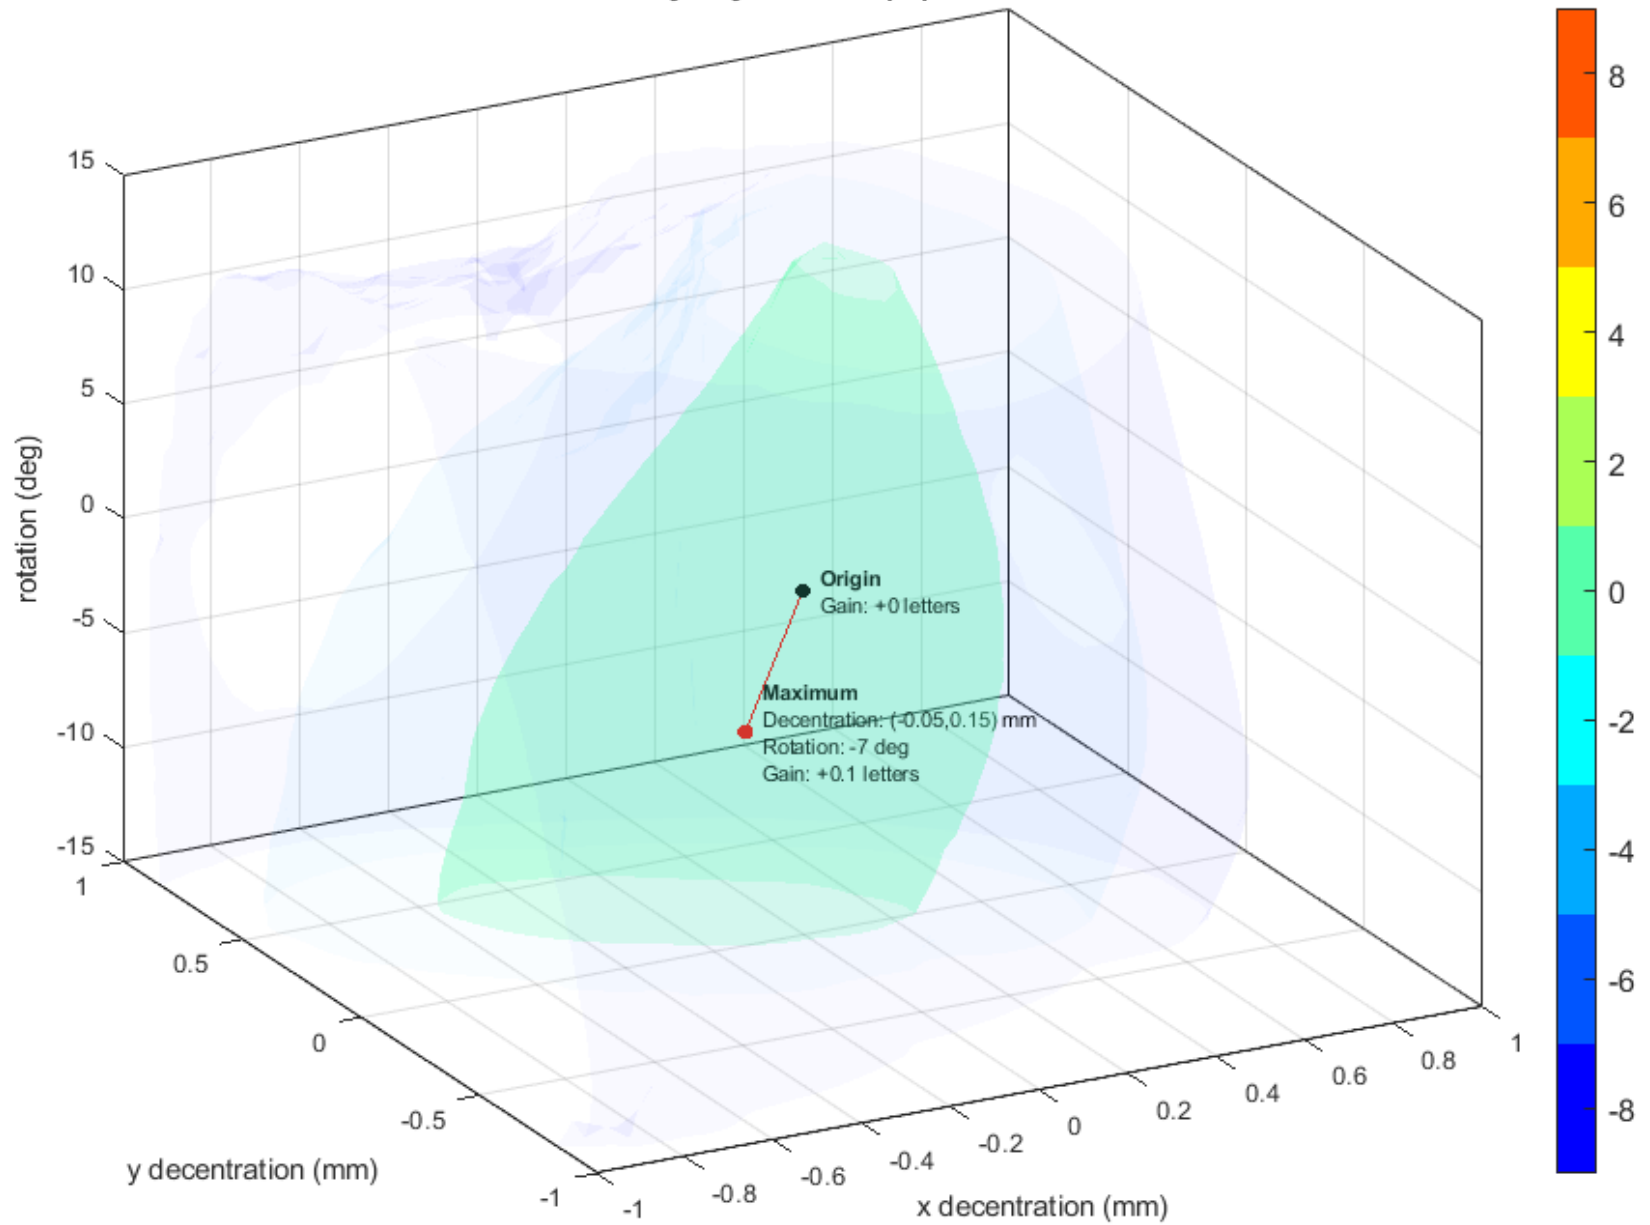

SyntEye 8 - 5mm pupil

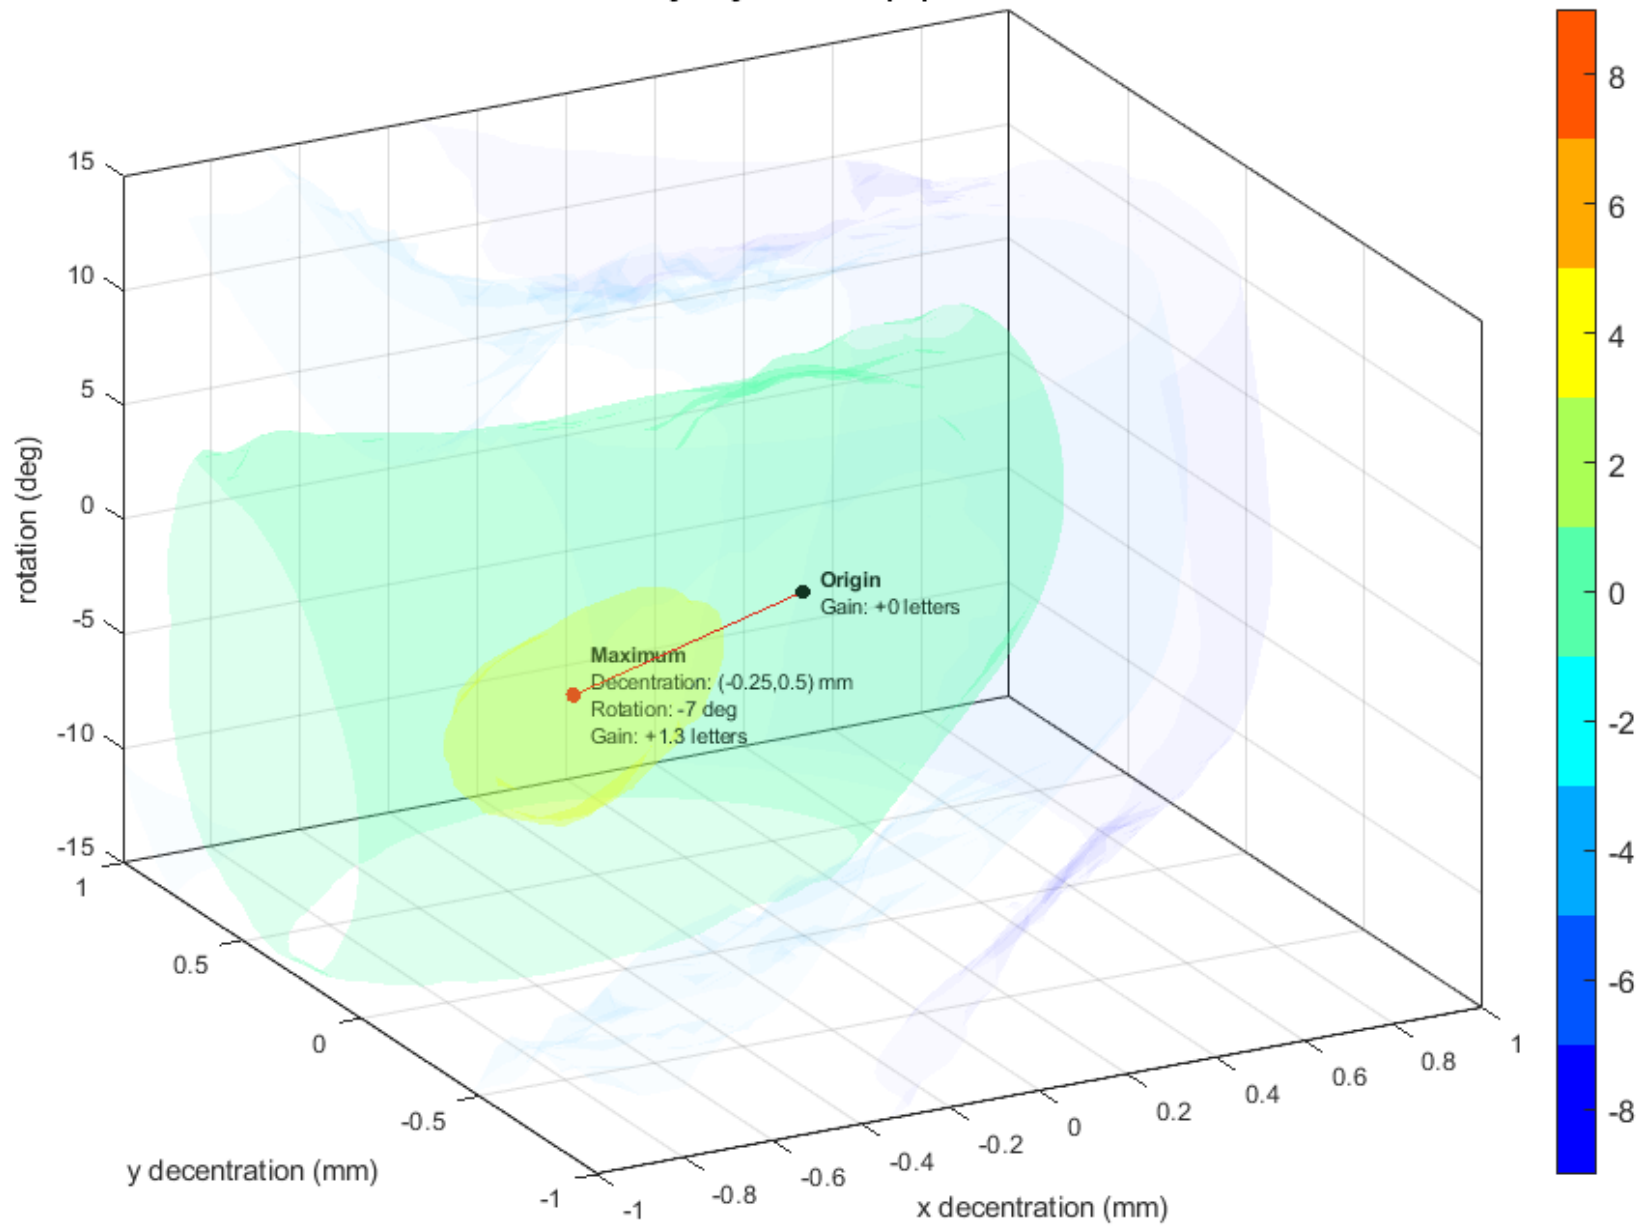

SyntEye 9 - 5mm pupil

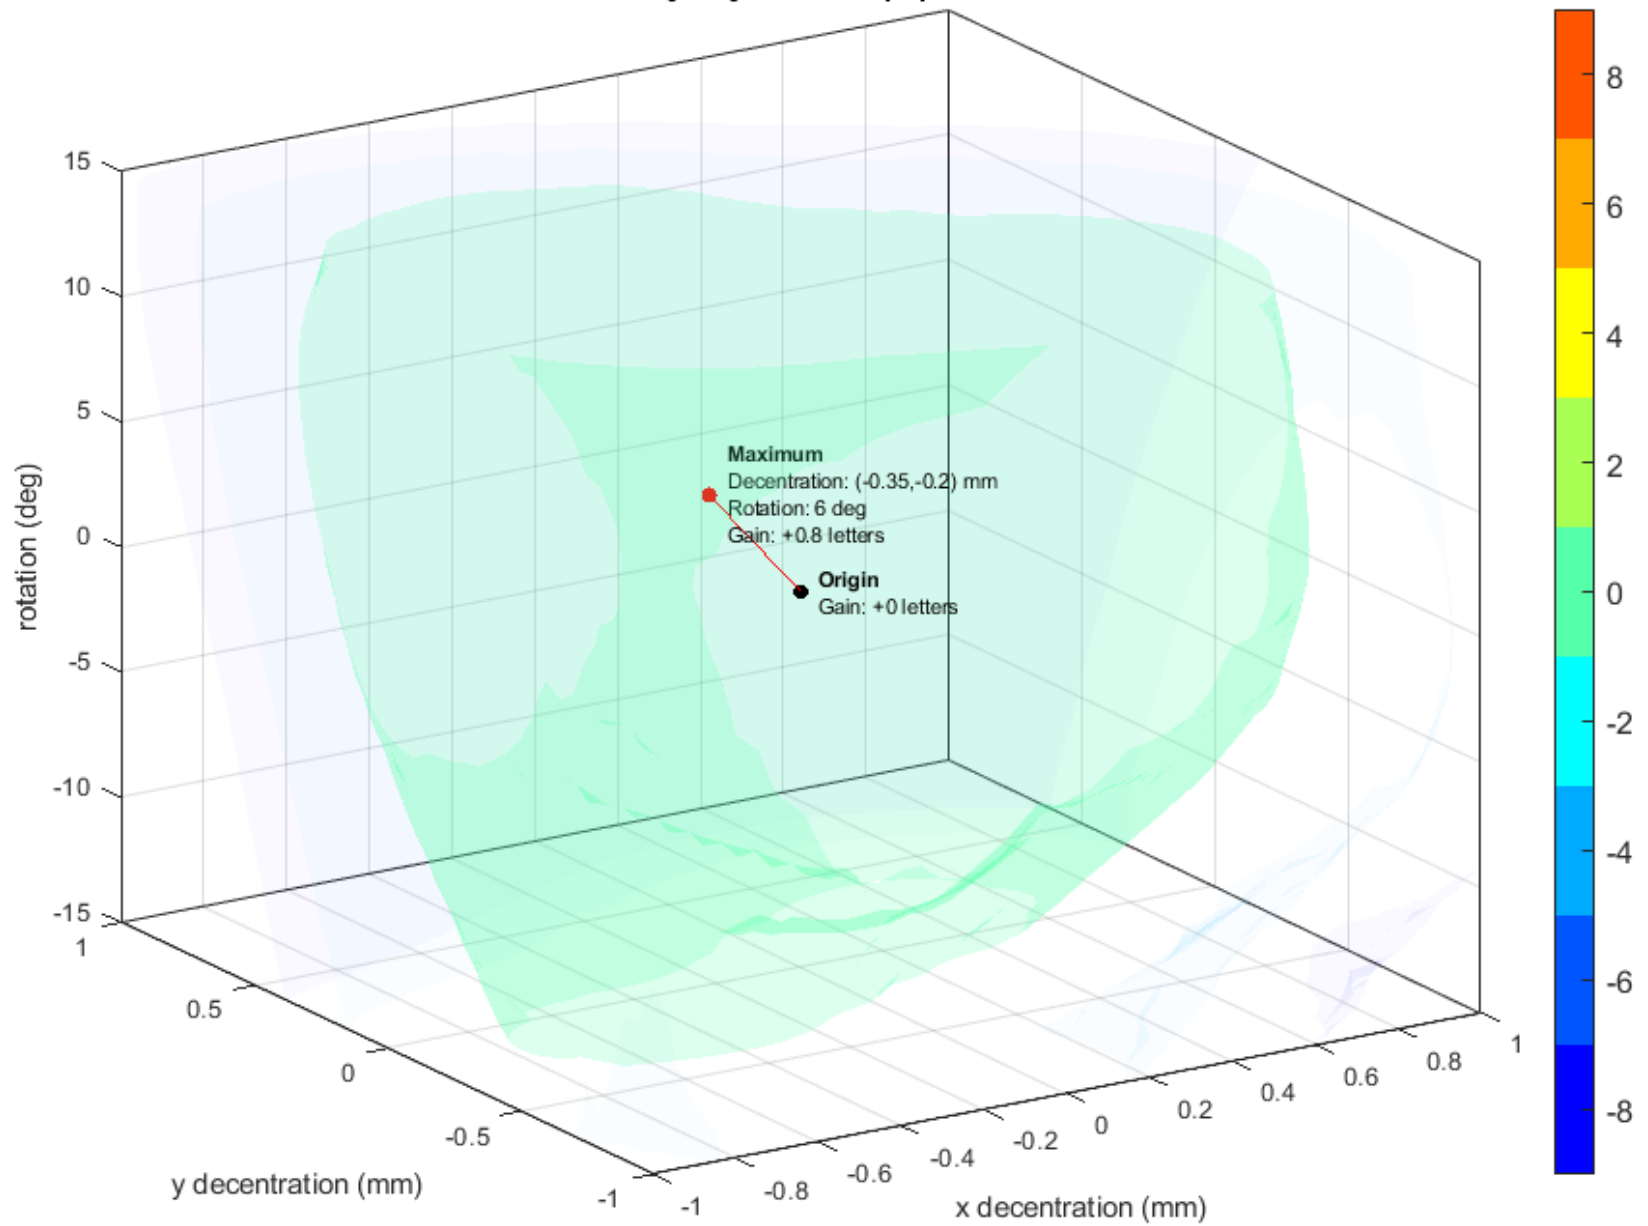

SyntEye 10 - 5mm pupil

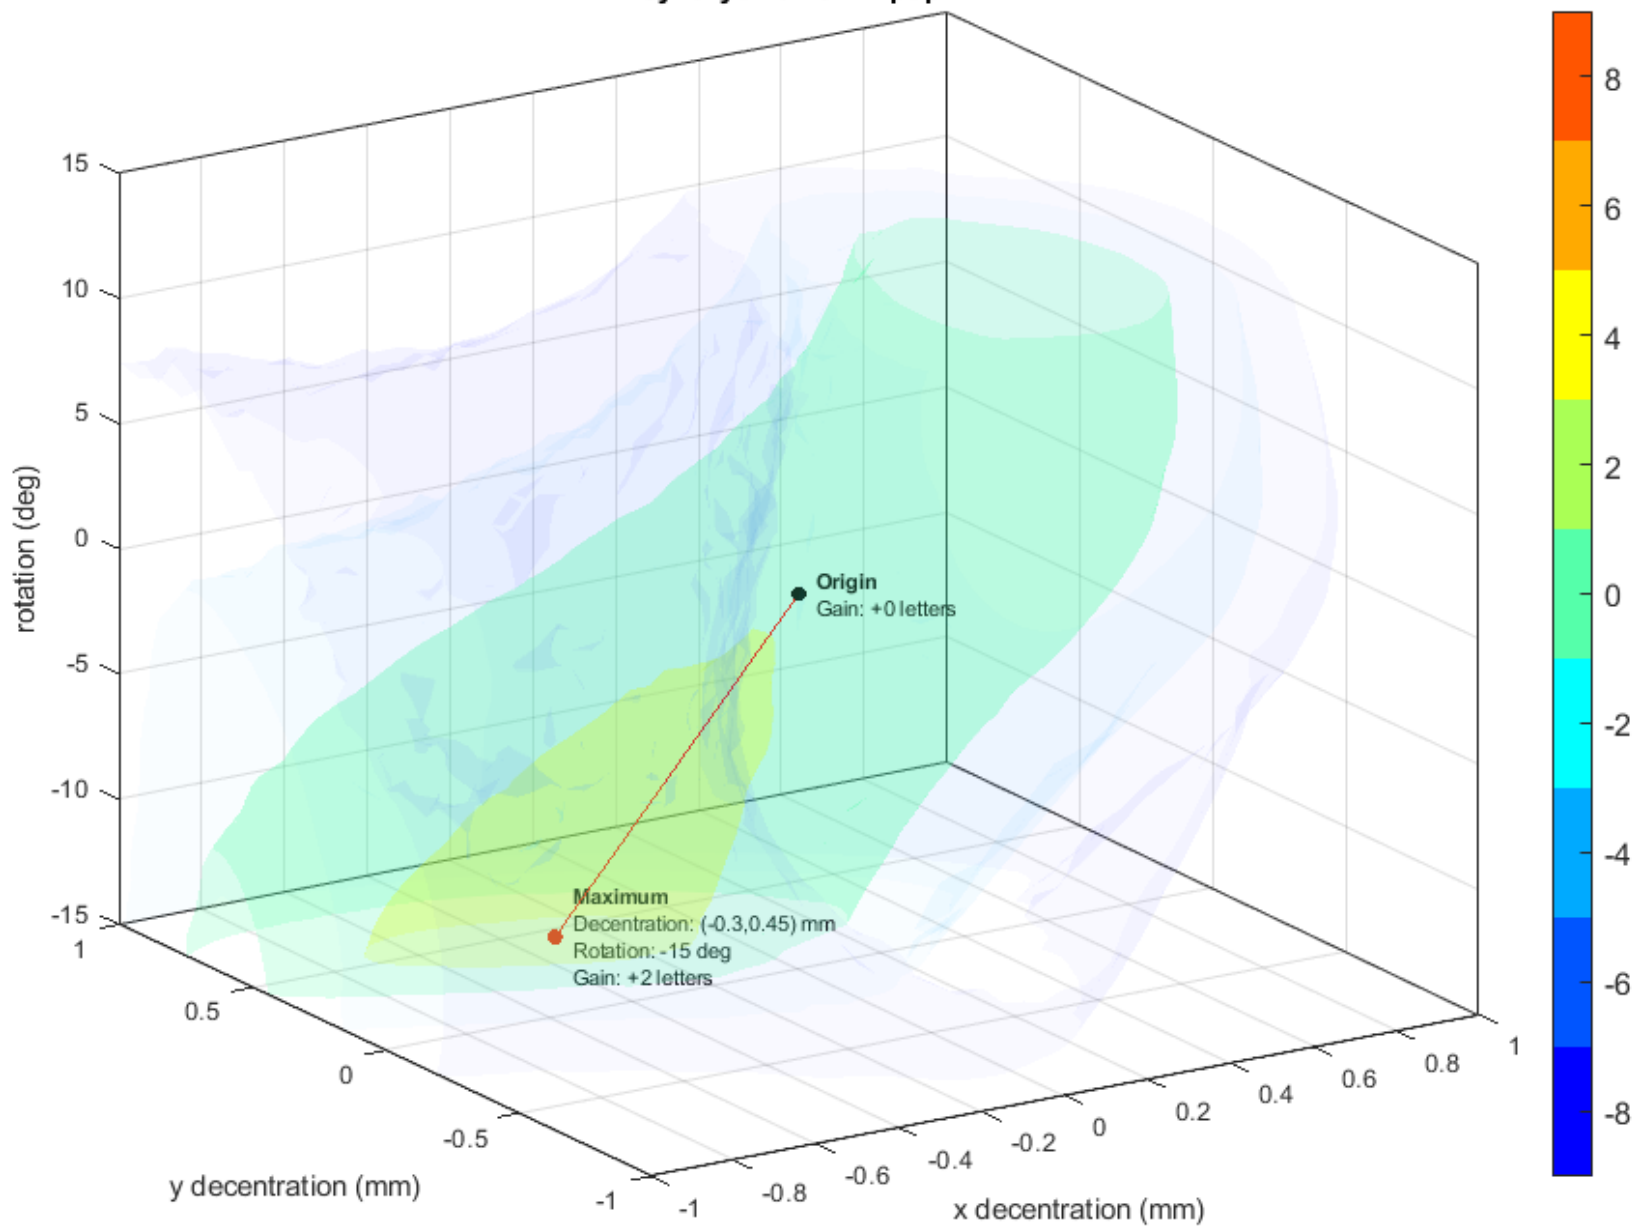



SyntEye 11 - 5mm pupil

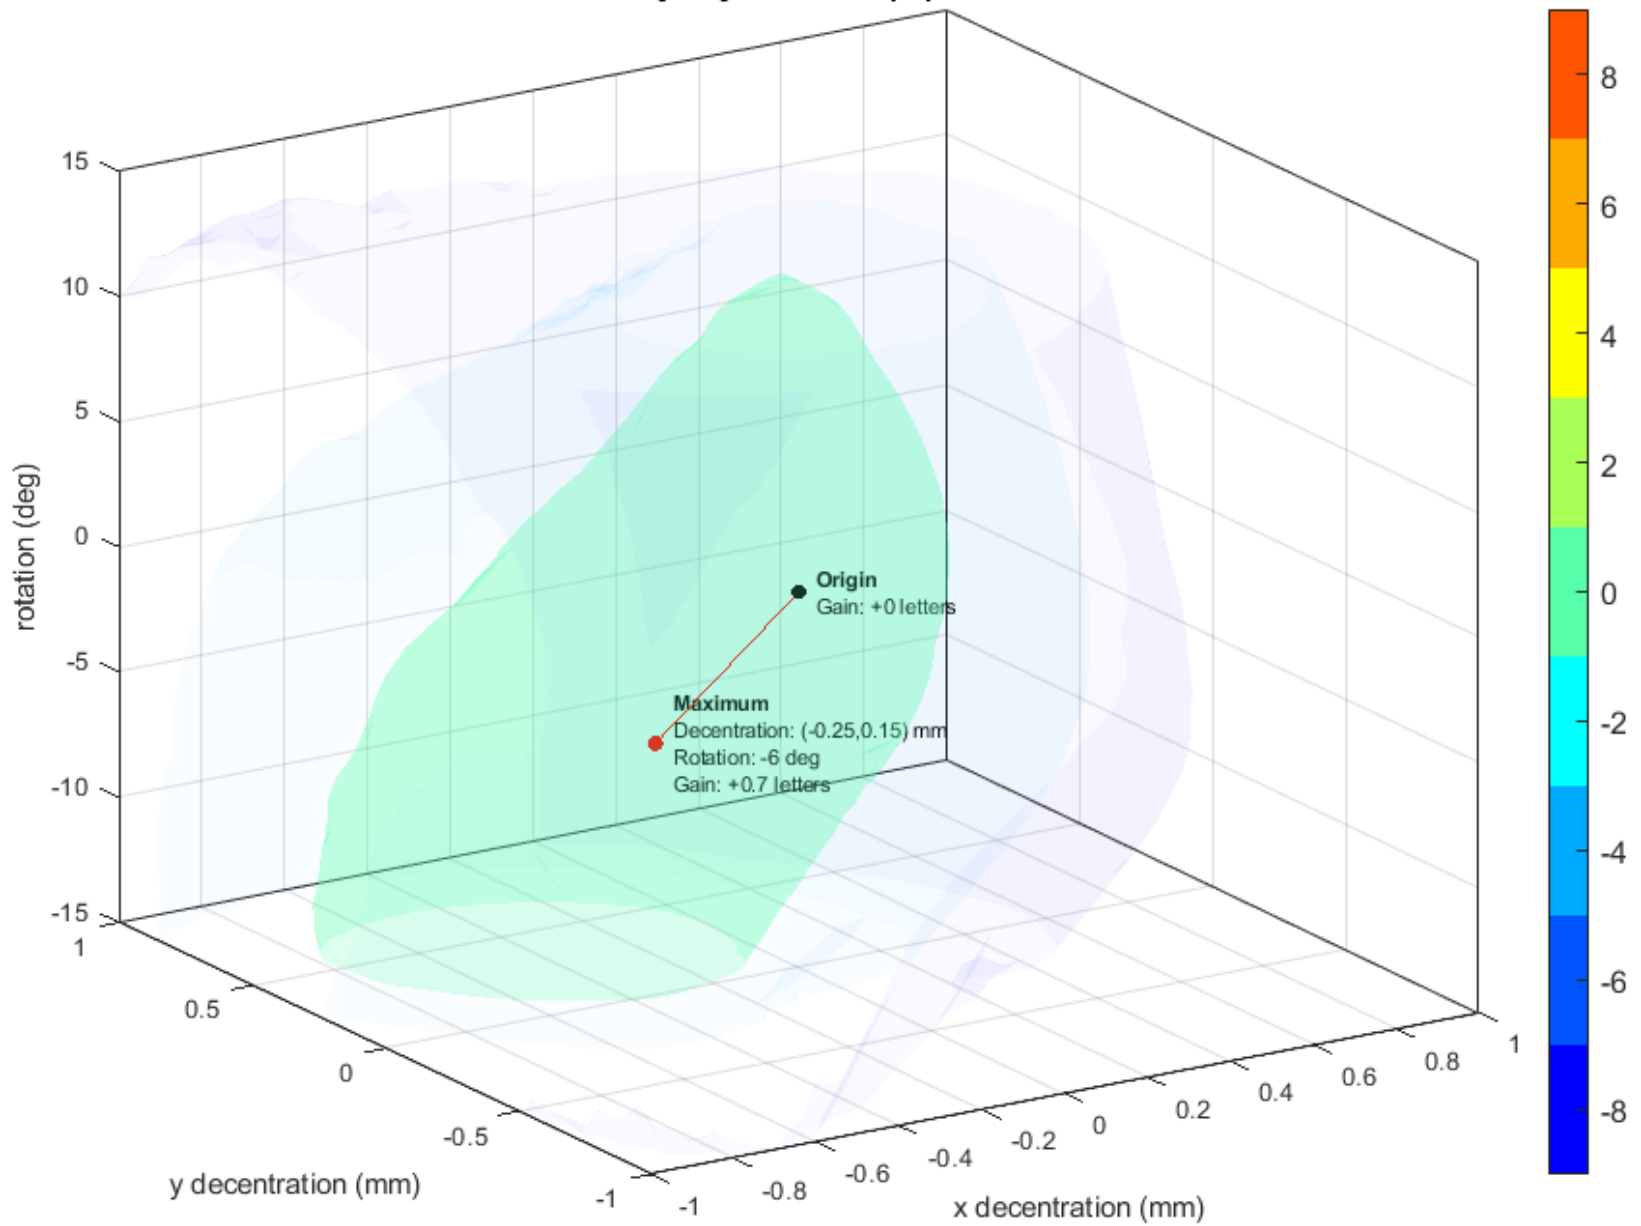

SyntEye 12 - 5mm pupil

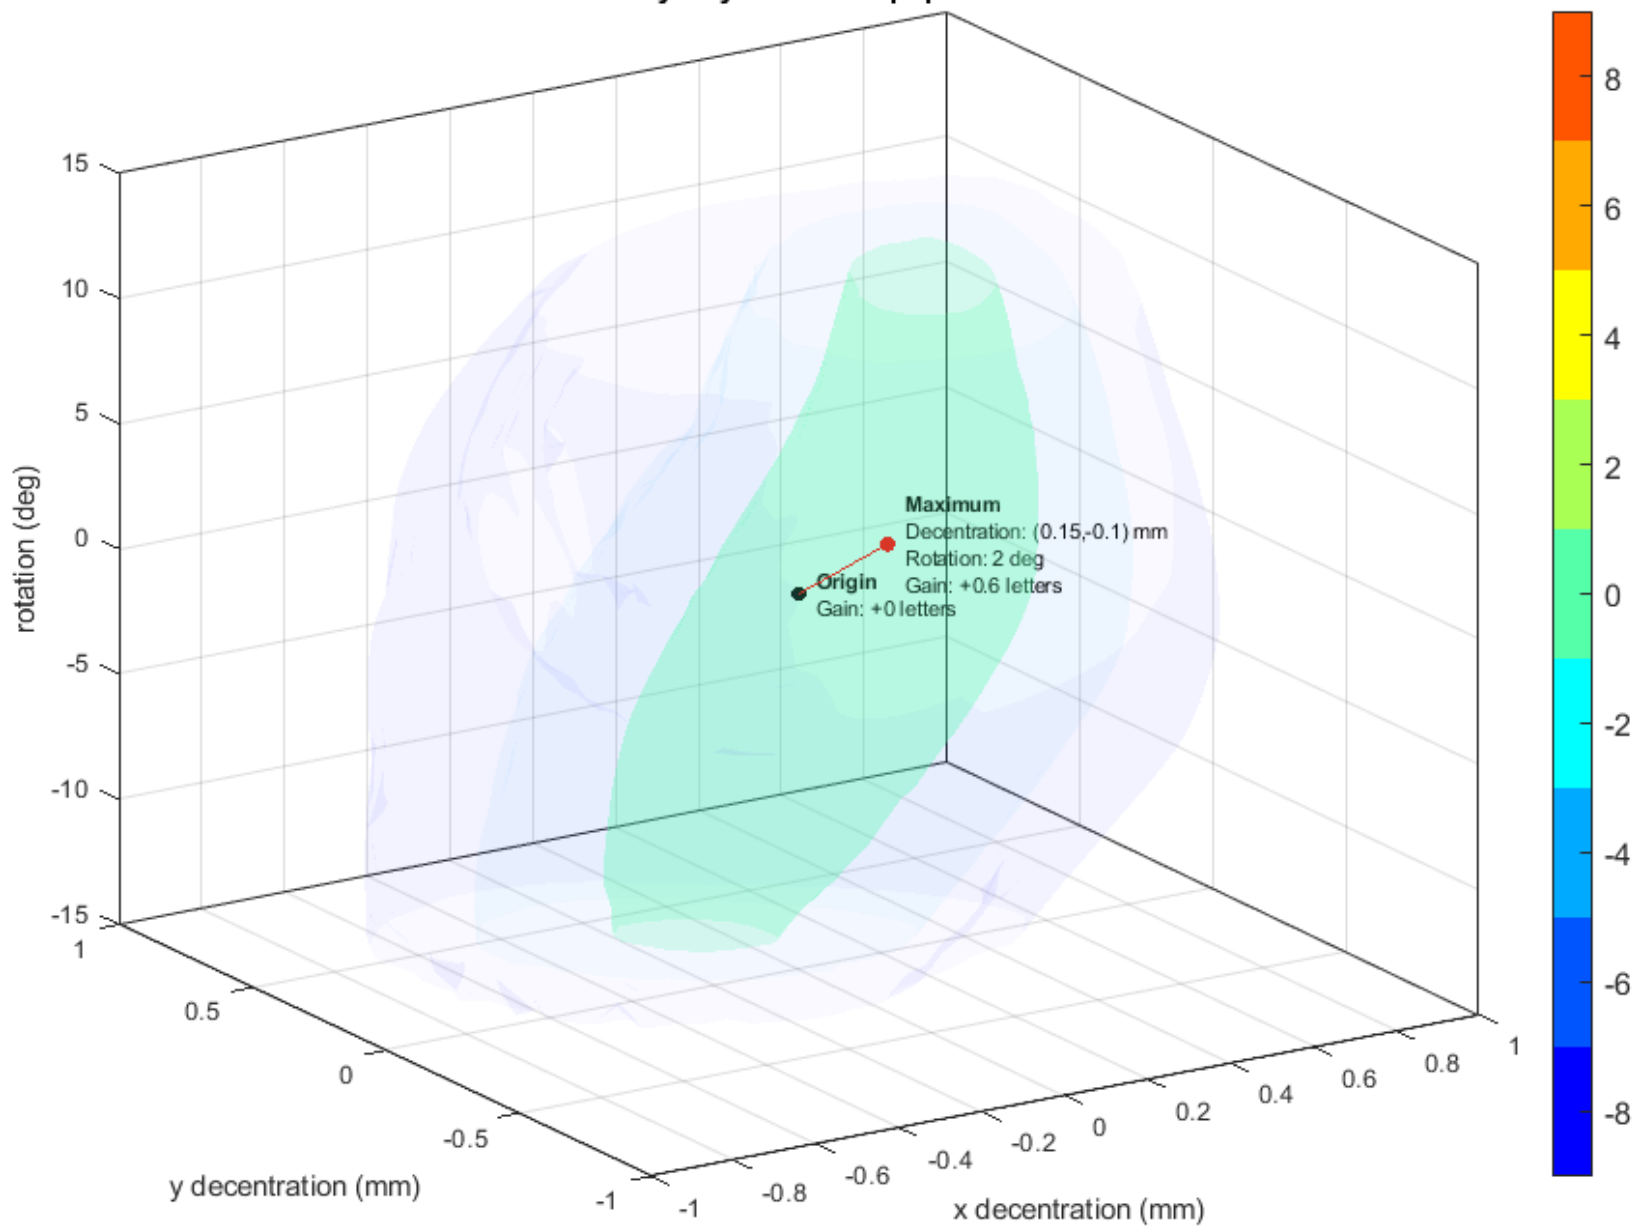

SyntEye 13 - 5mm pupil

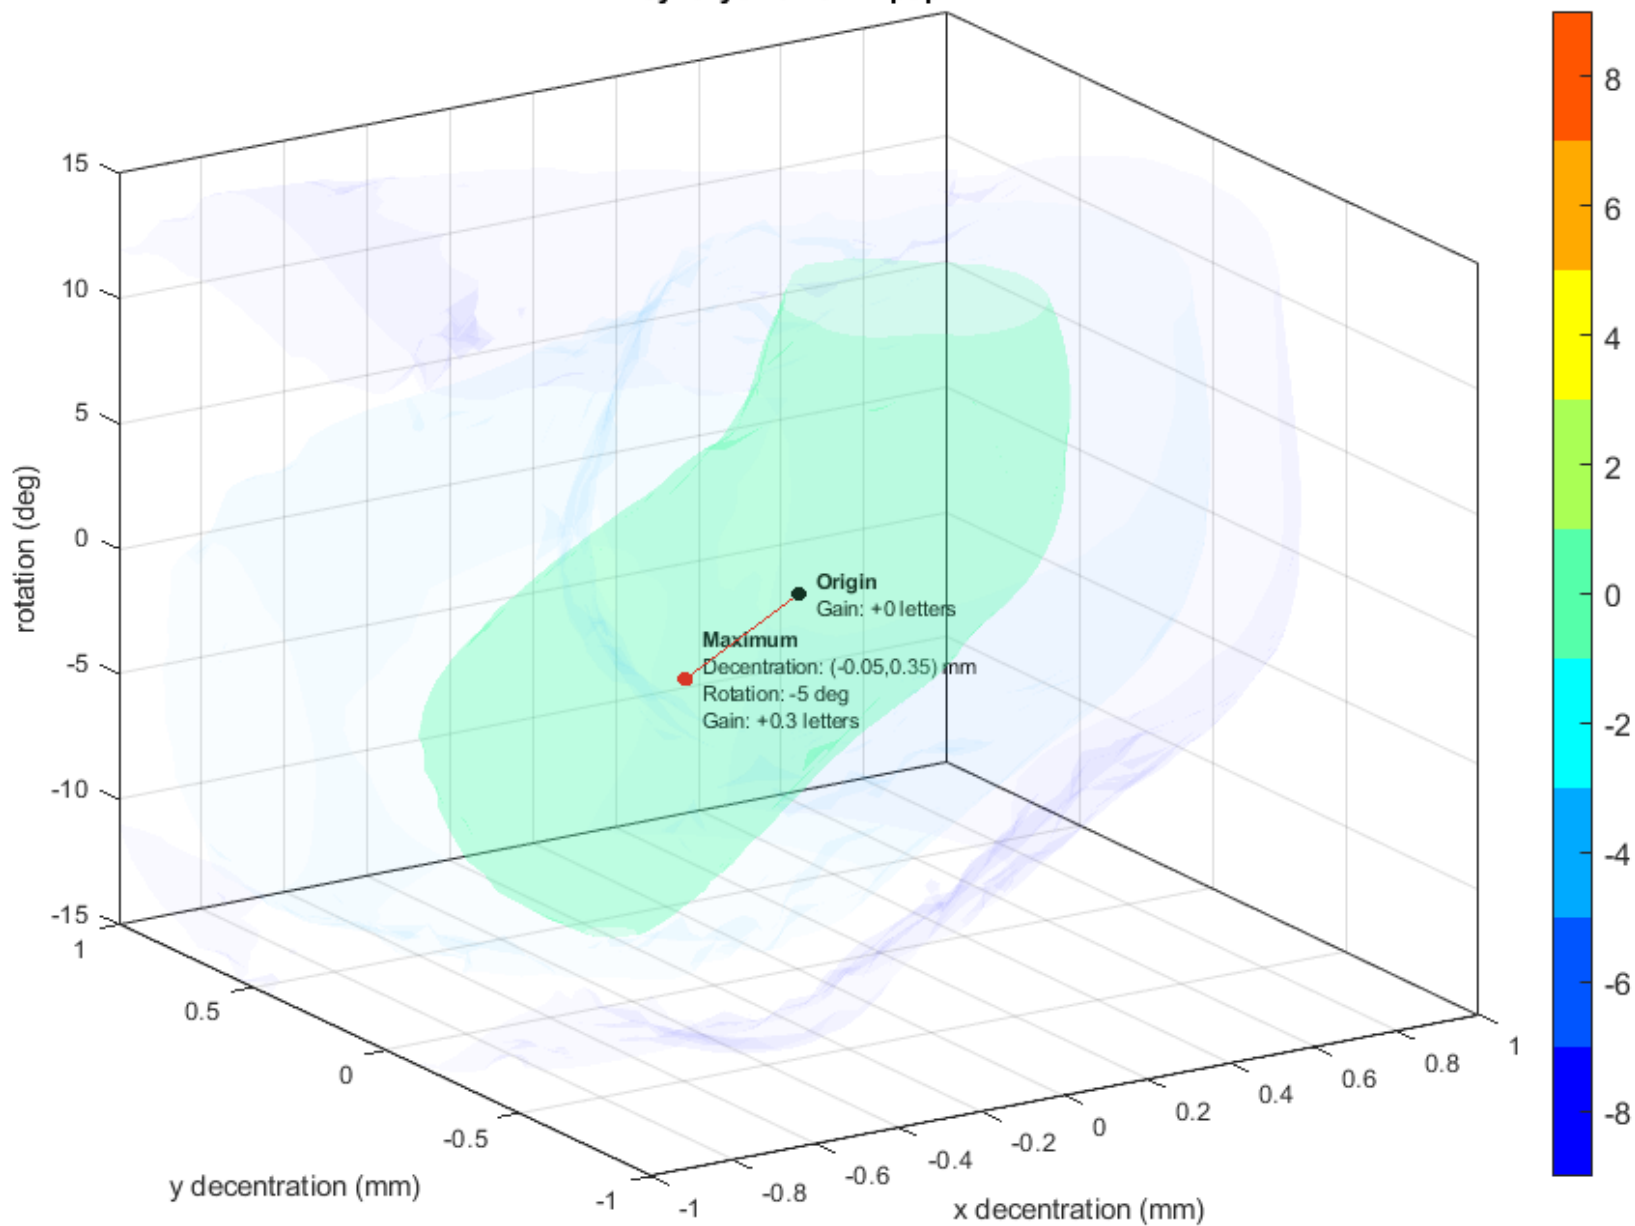

SyntEye 14 - 5mm pupil

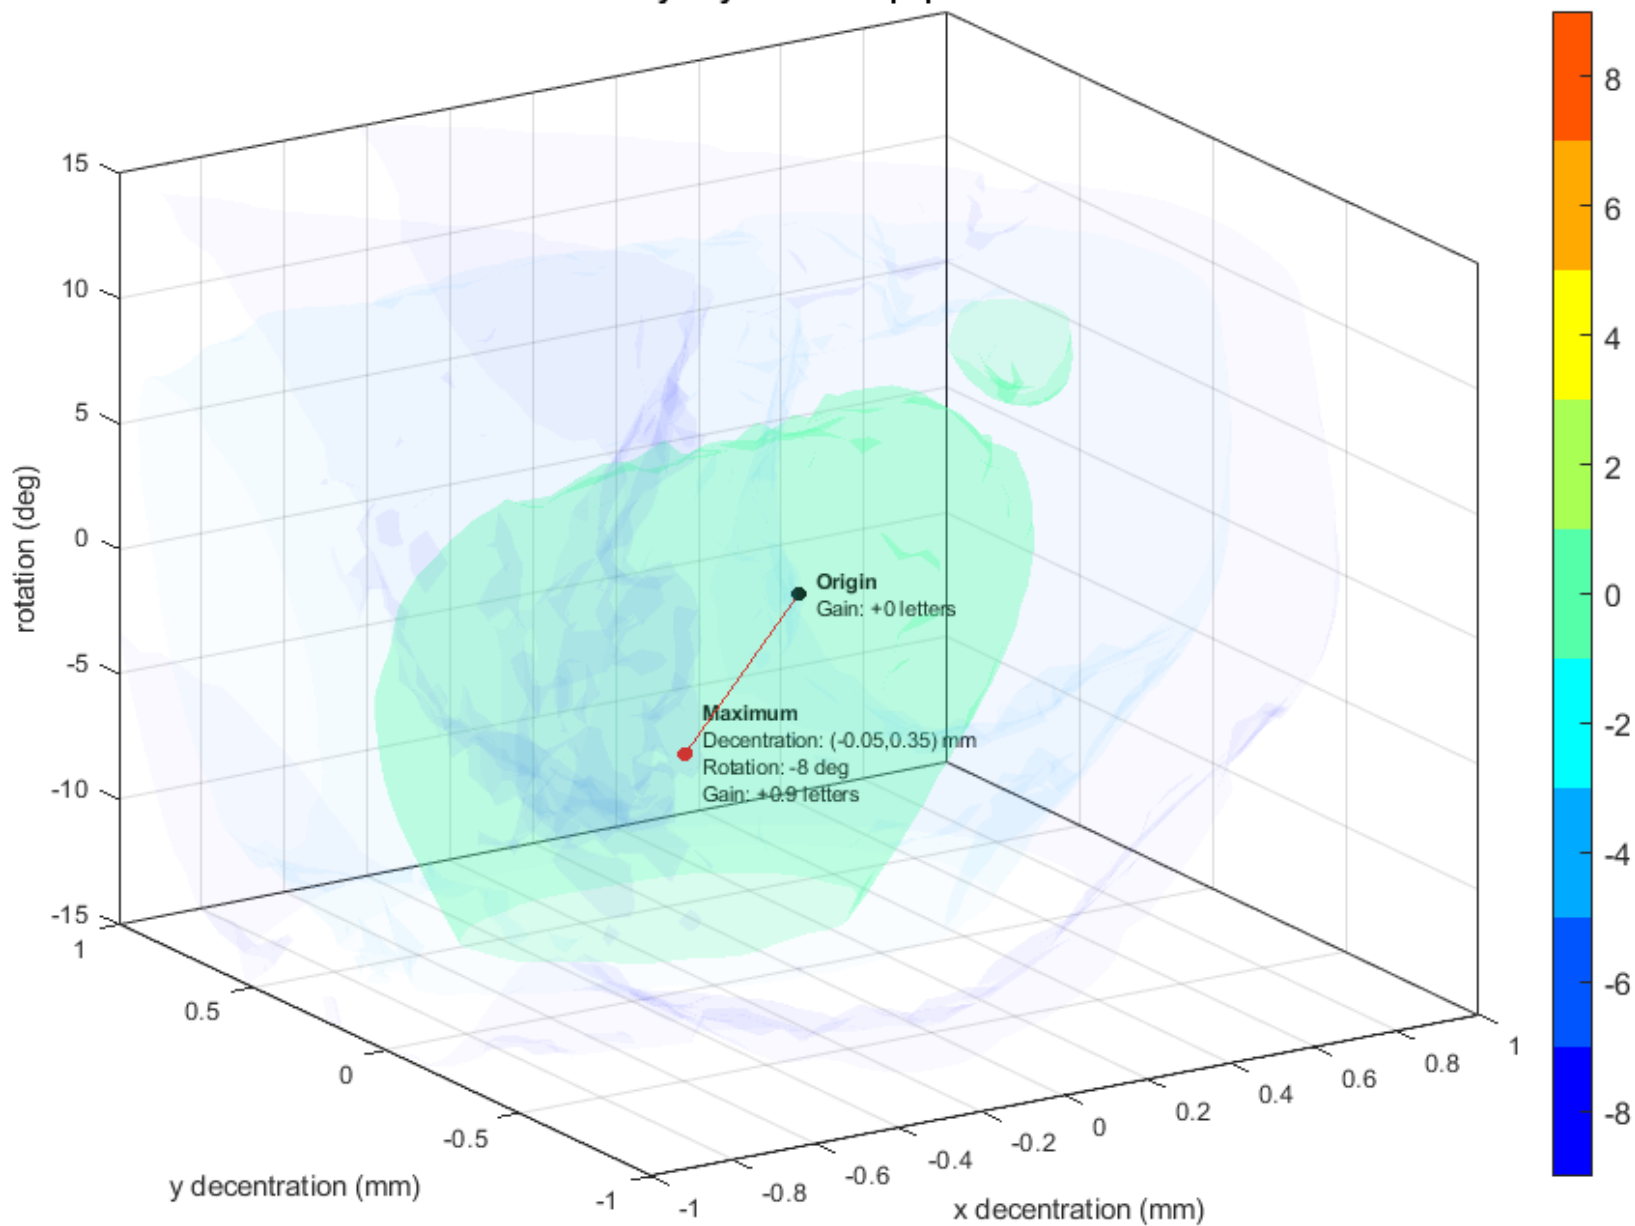

SyntEye 15 - 5mm pupil

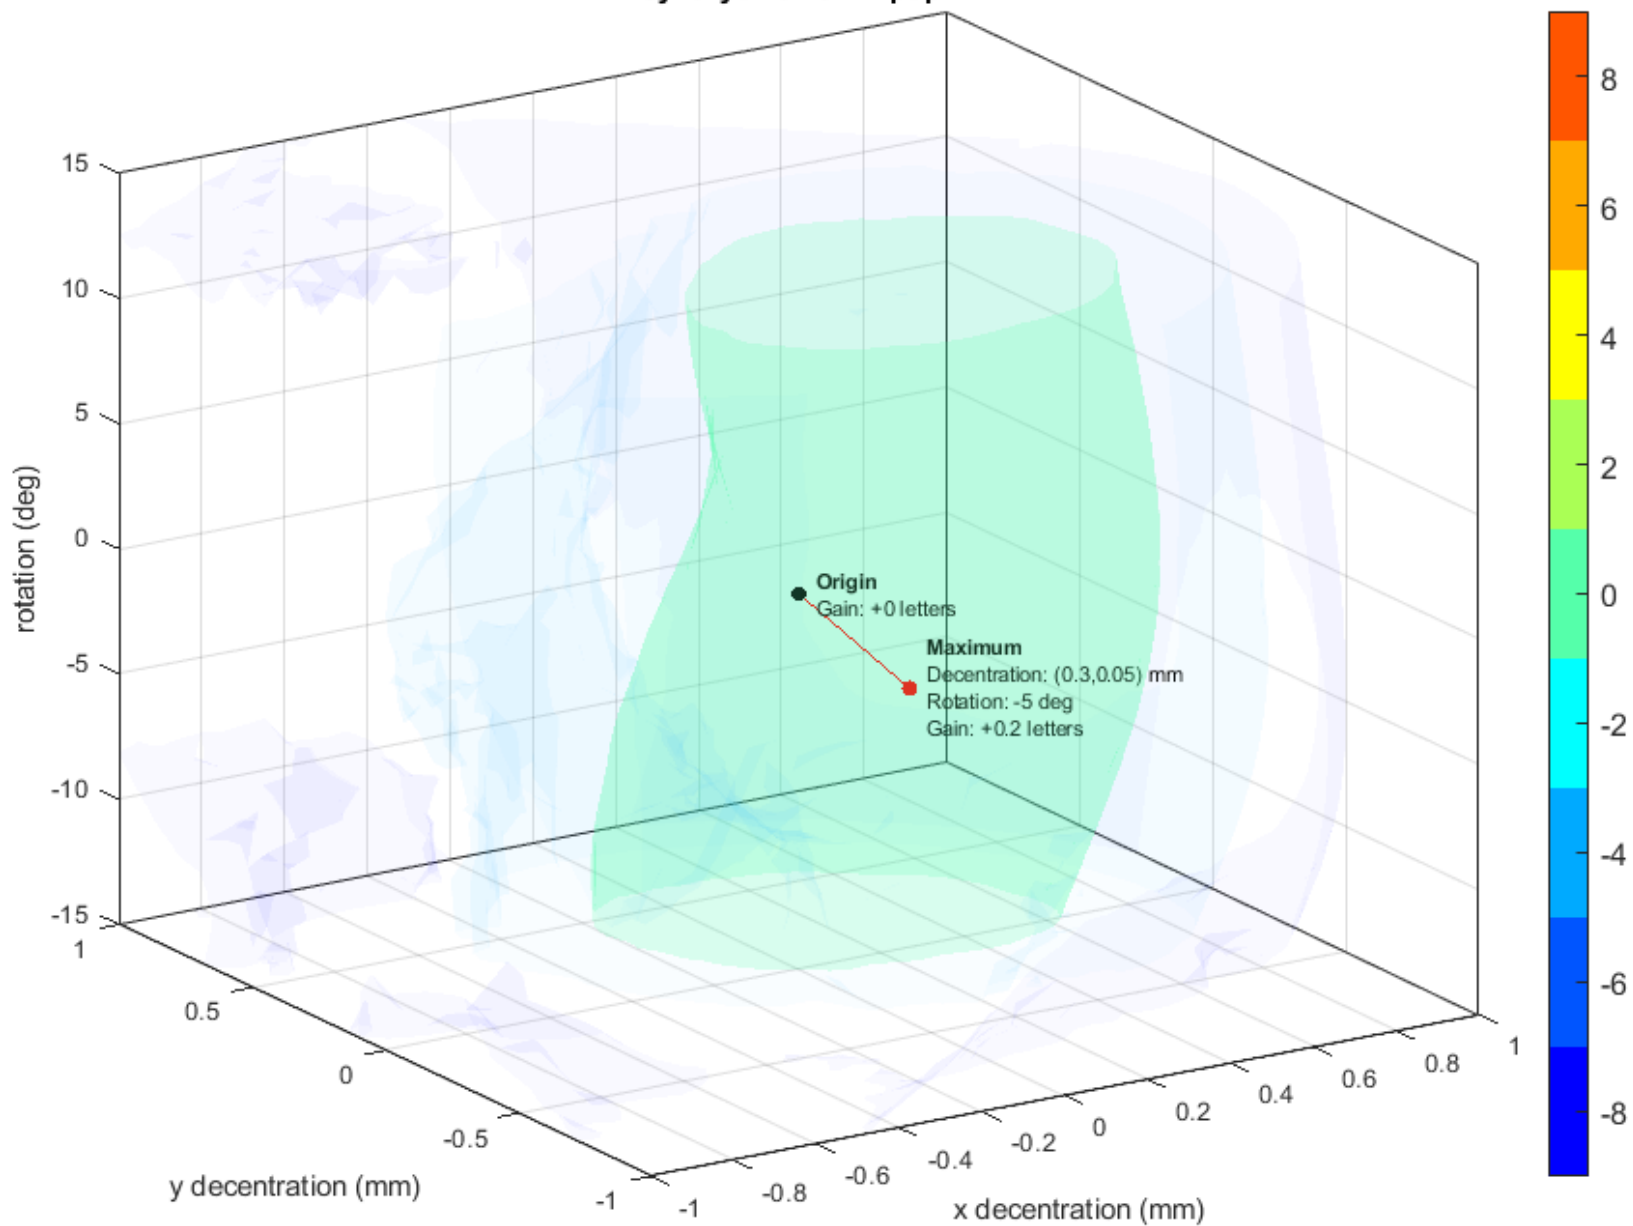

SyntEye 16 - 5mm pupil

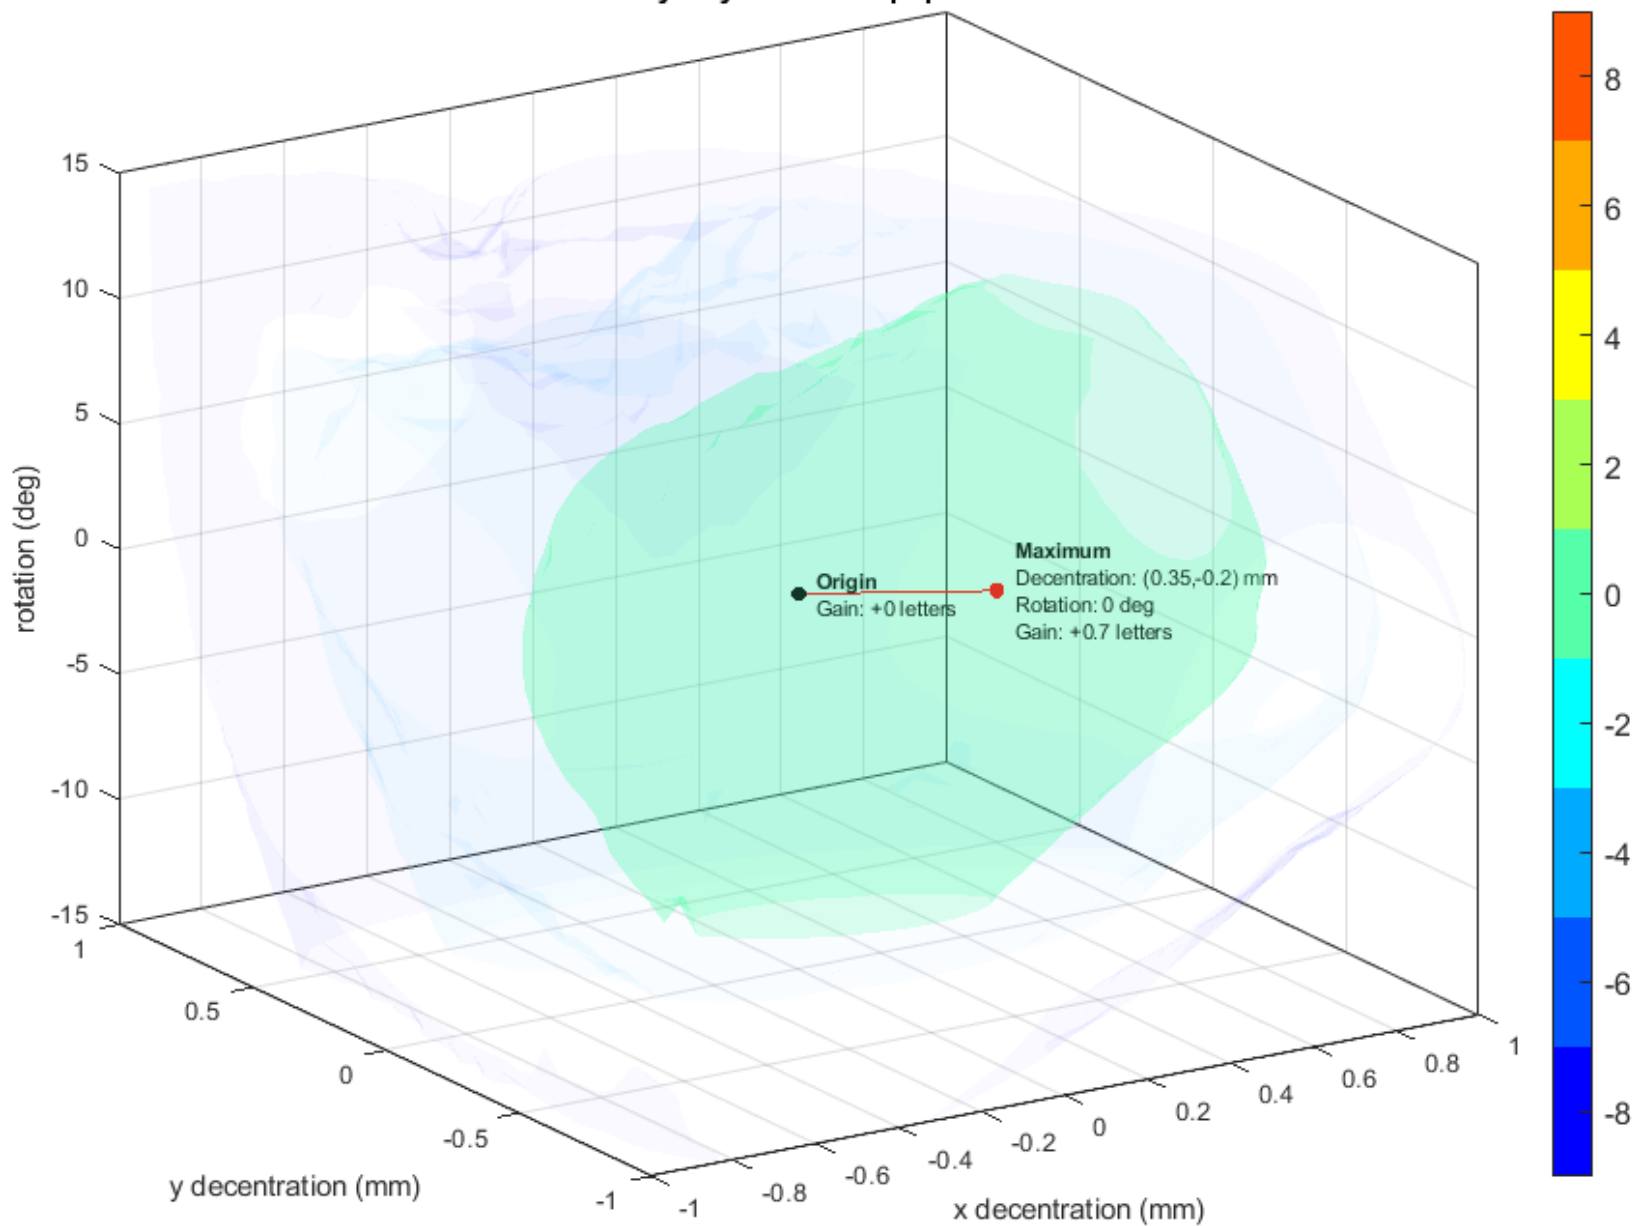

SyntEye 18 - 5mm pupil

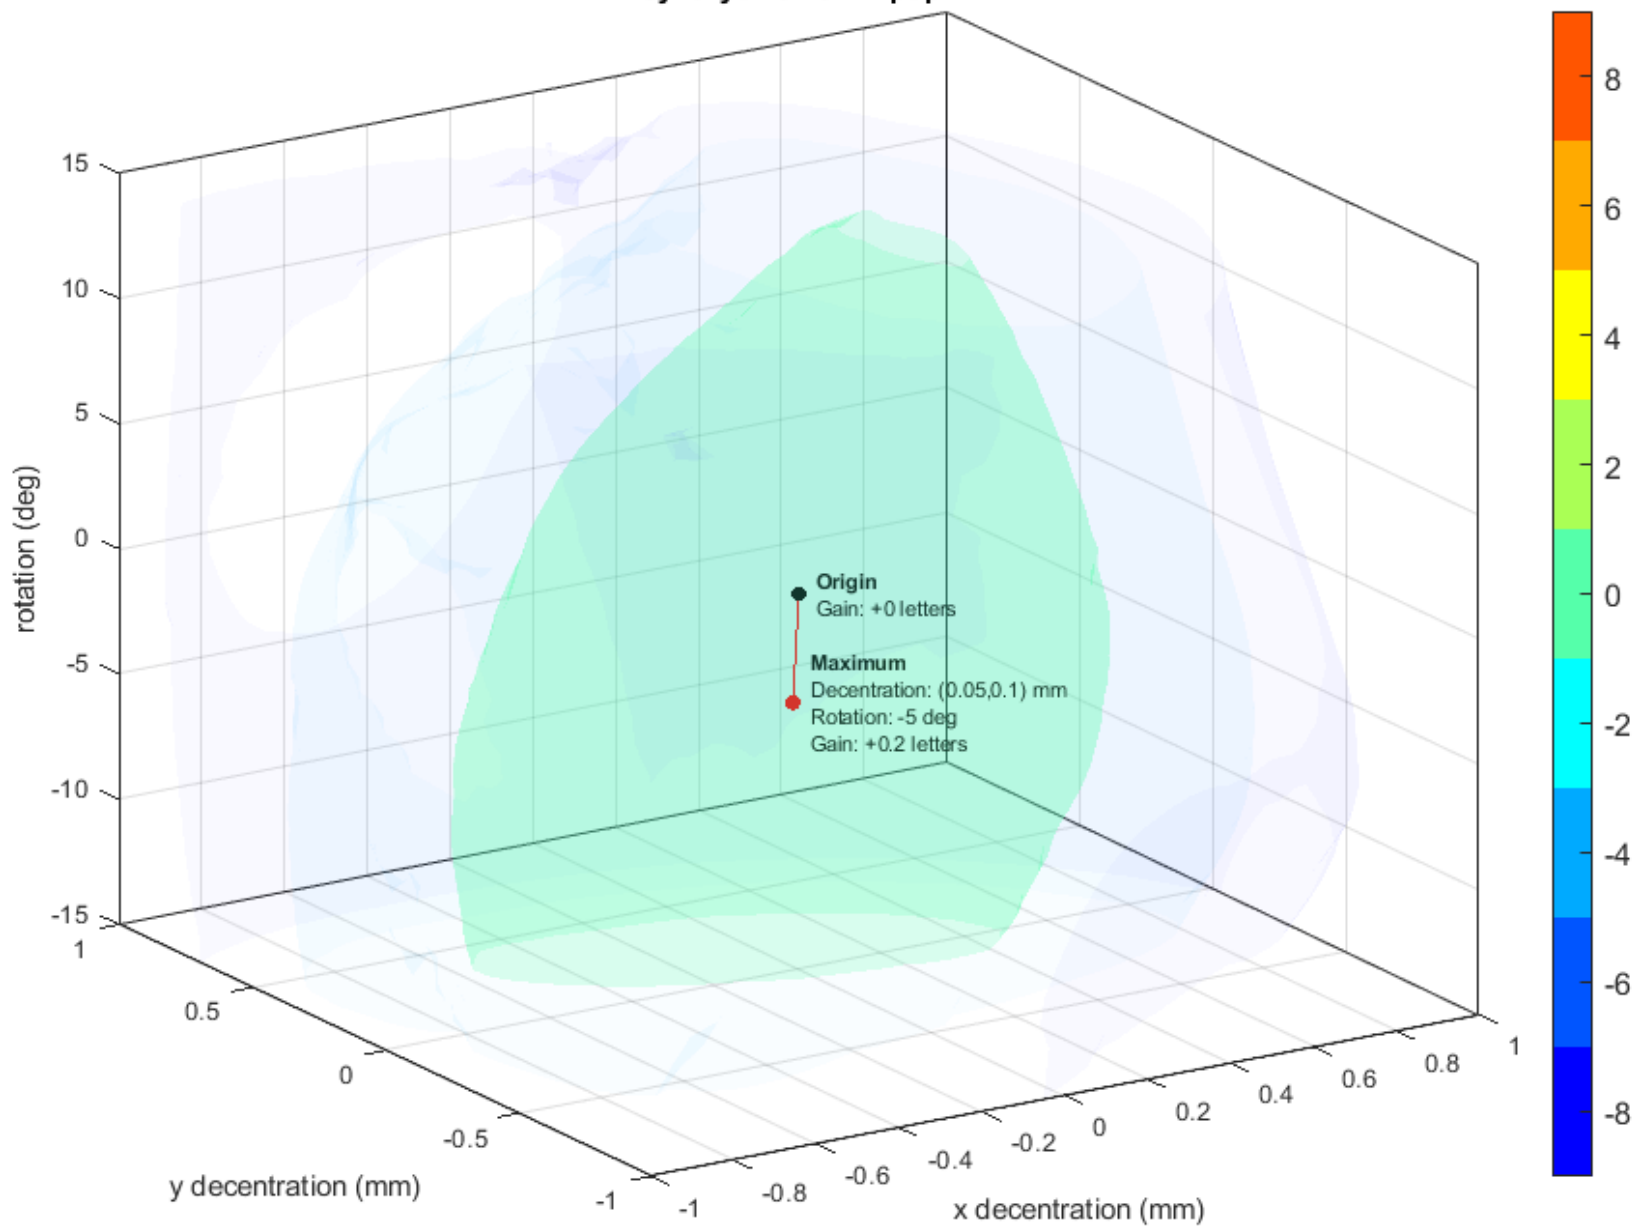

### SyntEye 20 - 5mm pupil

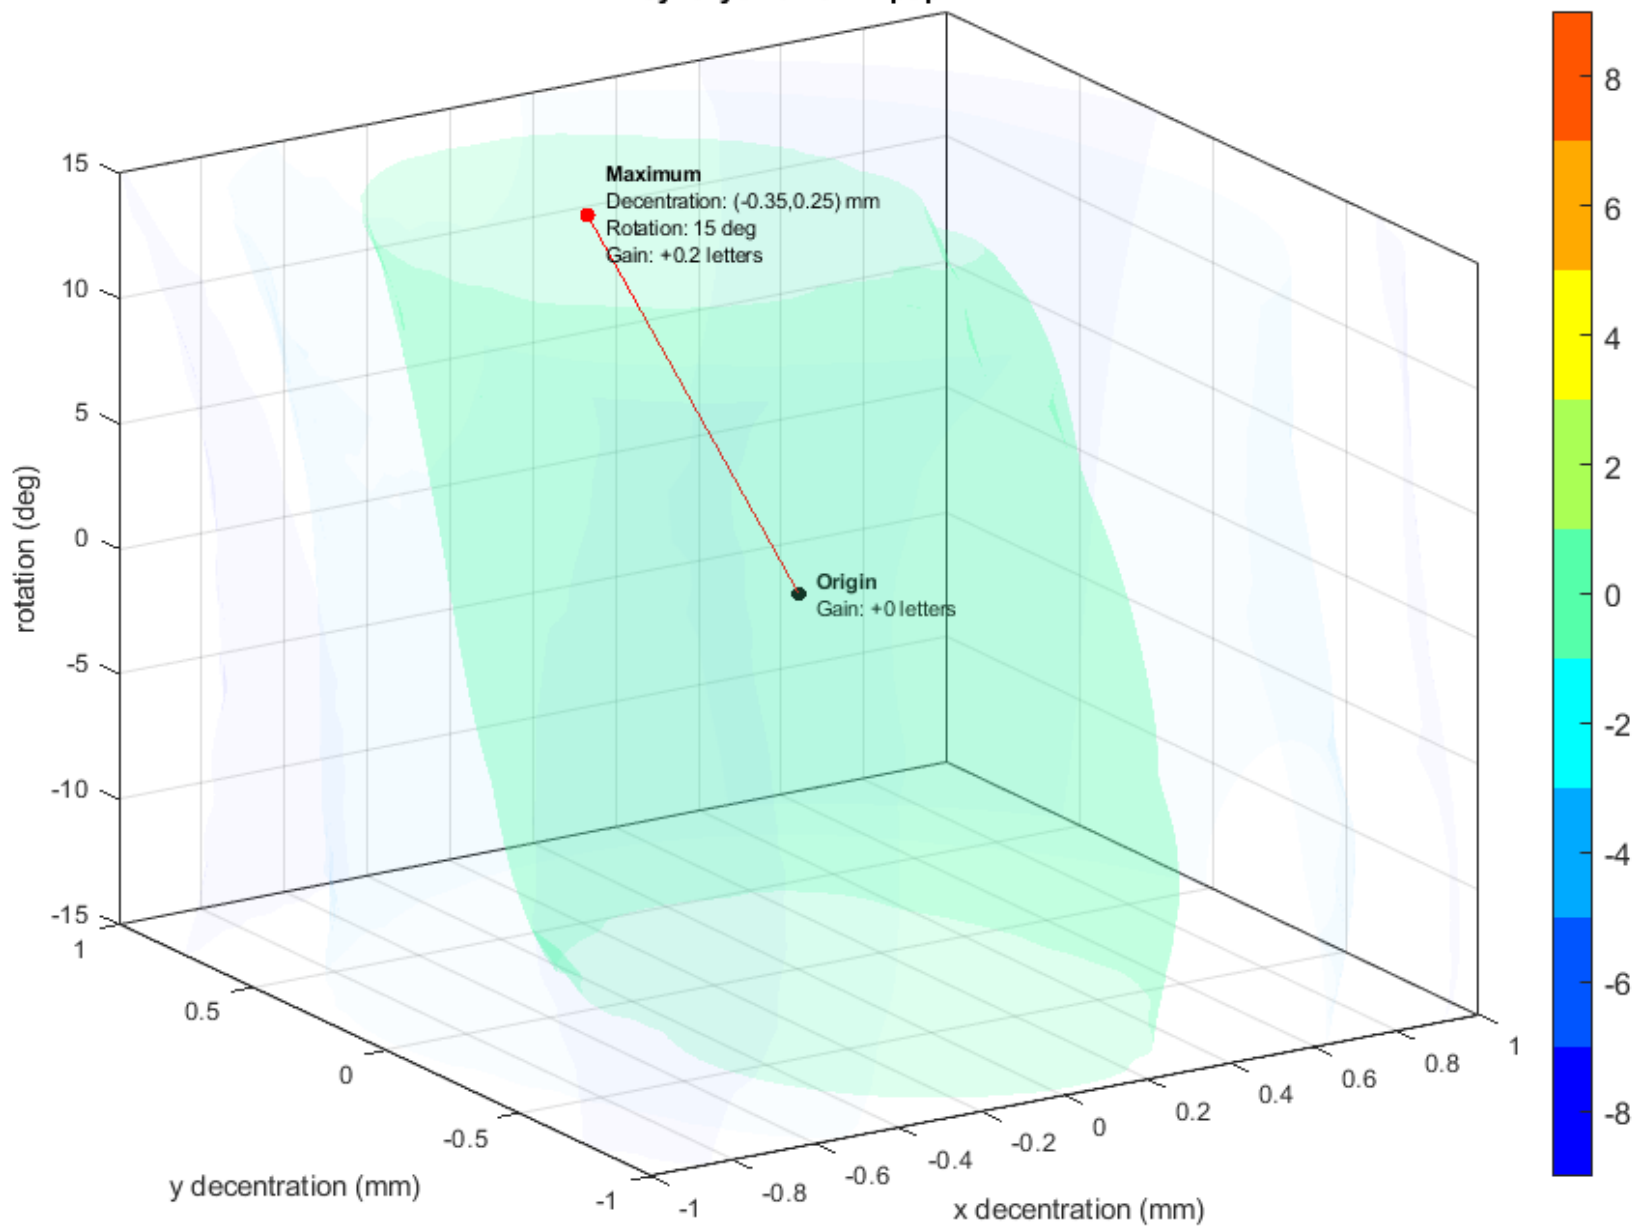



SyntEye 21 - 5mm pupil

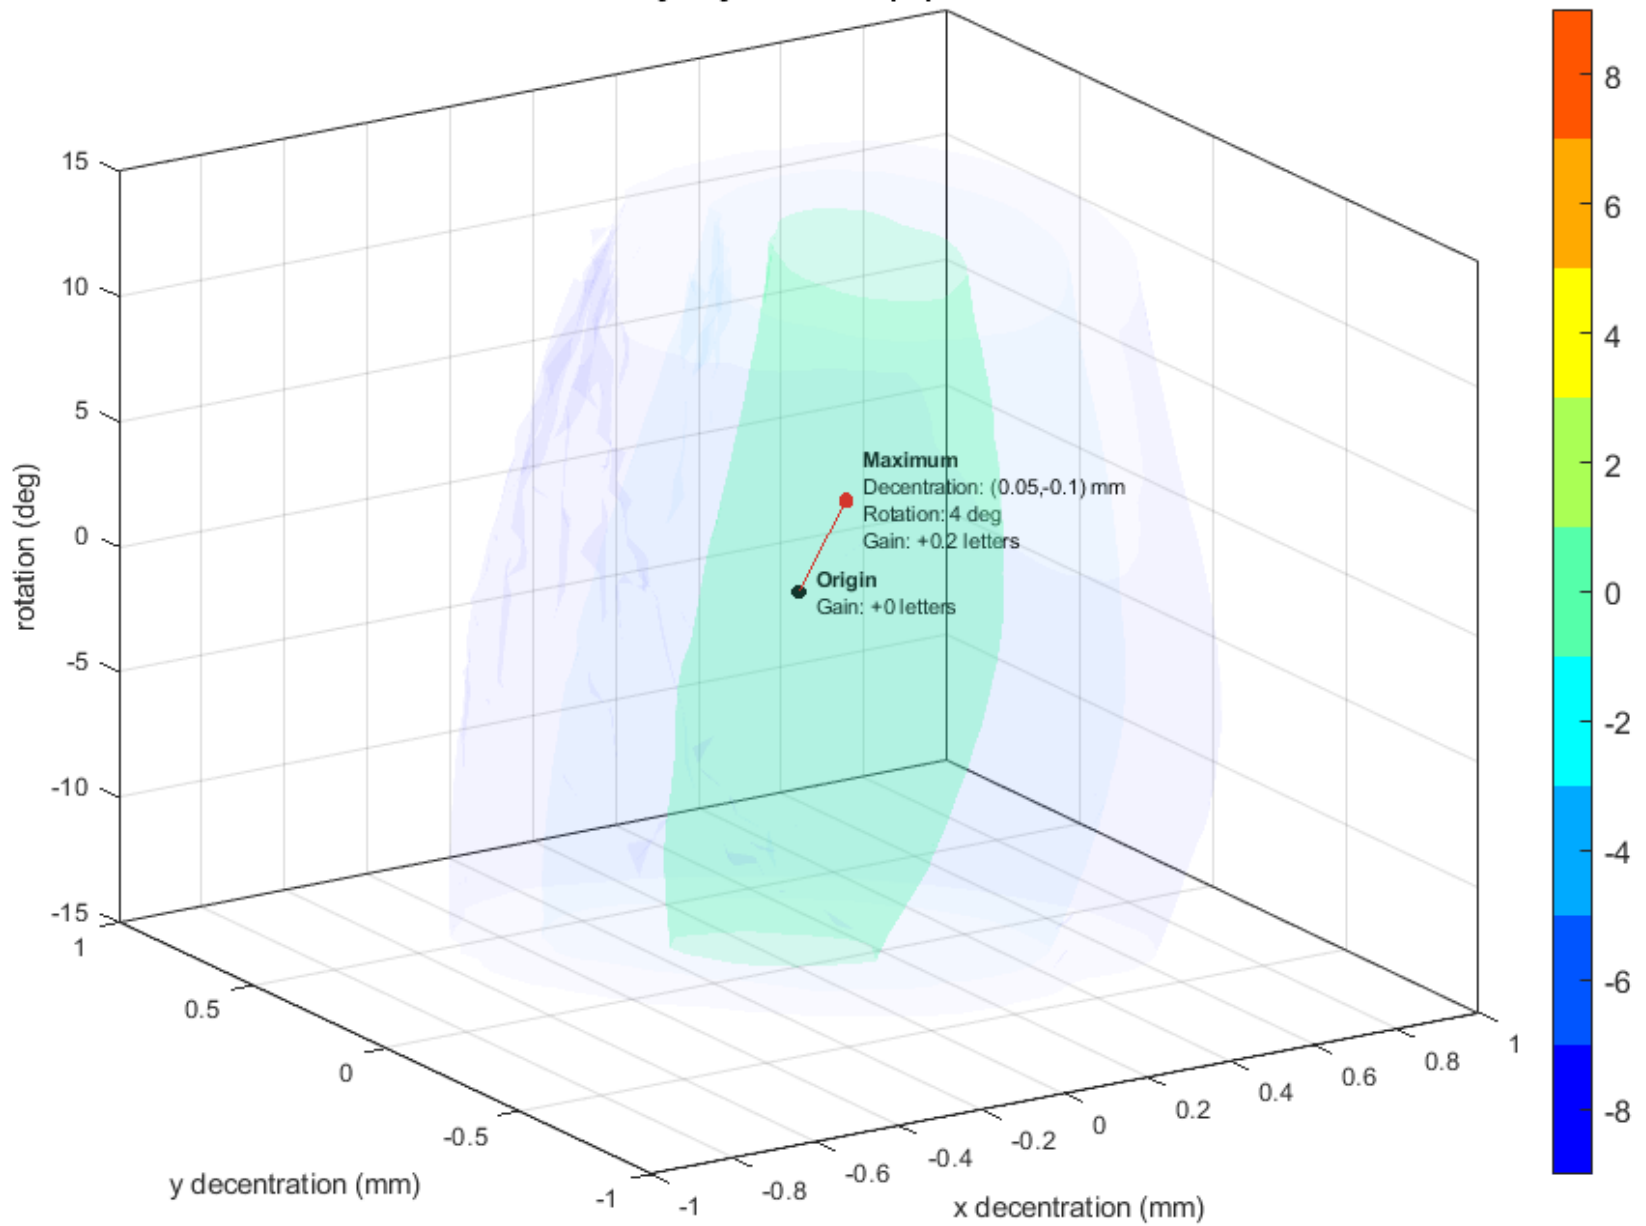

SyntEye 23 - 5mm pupil

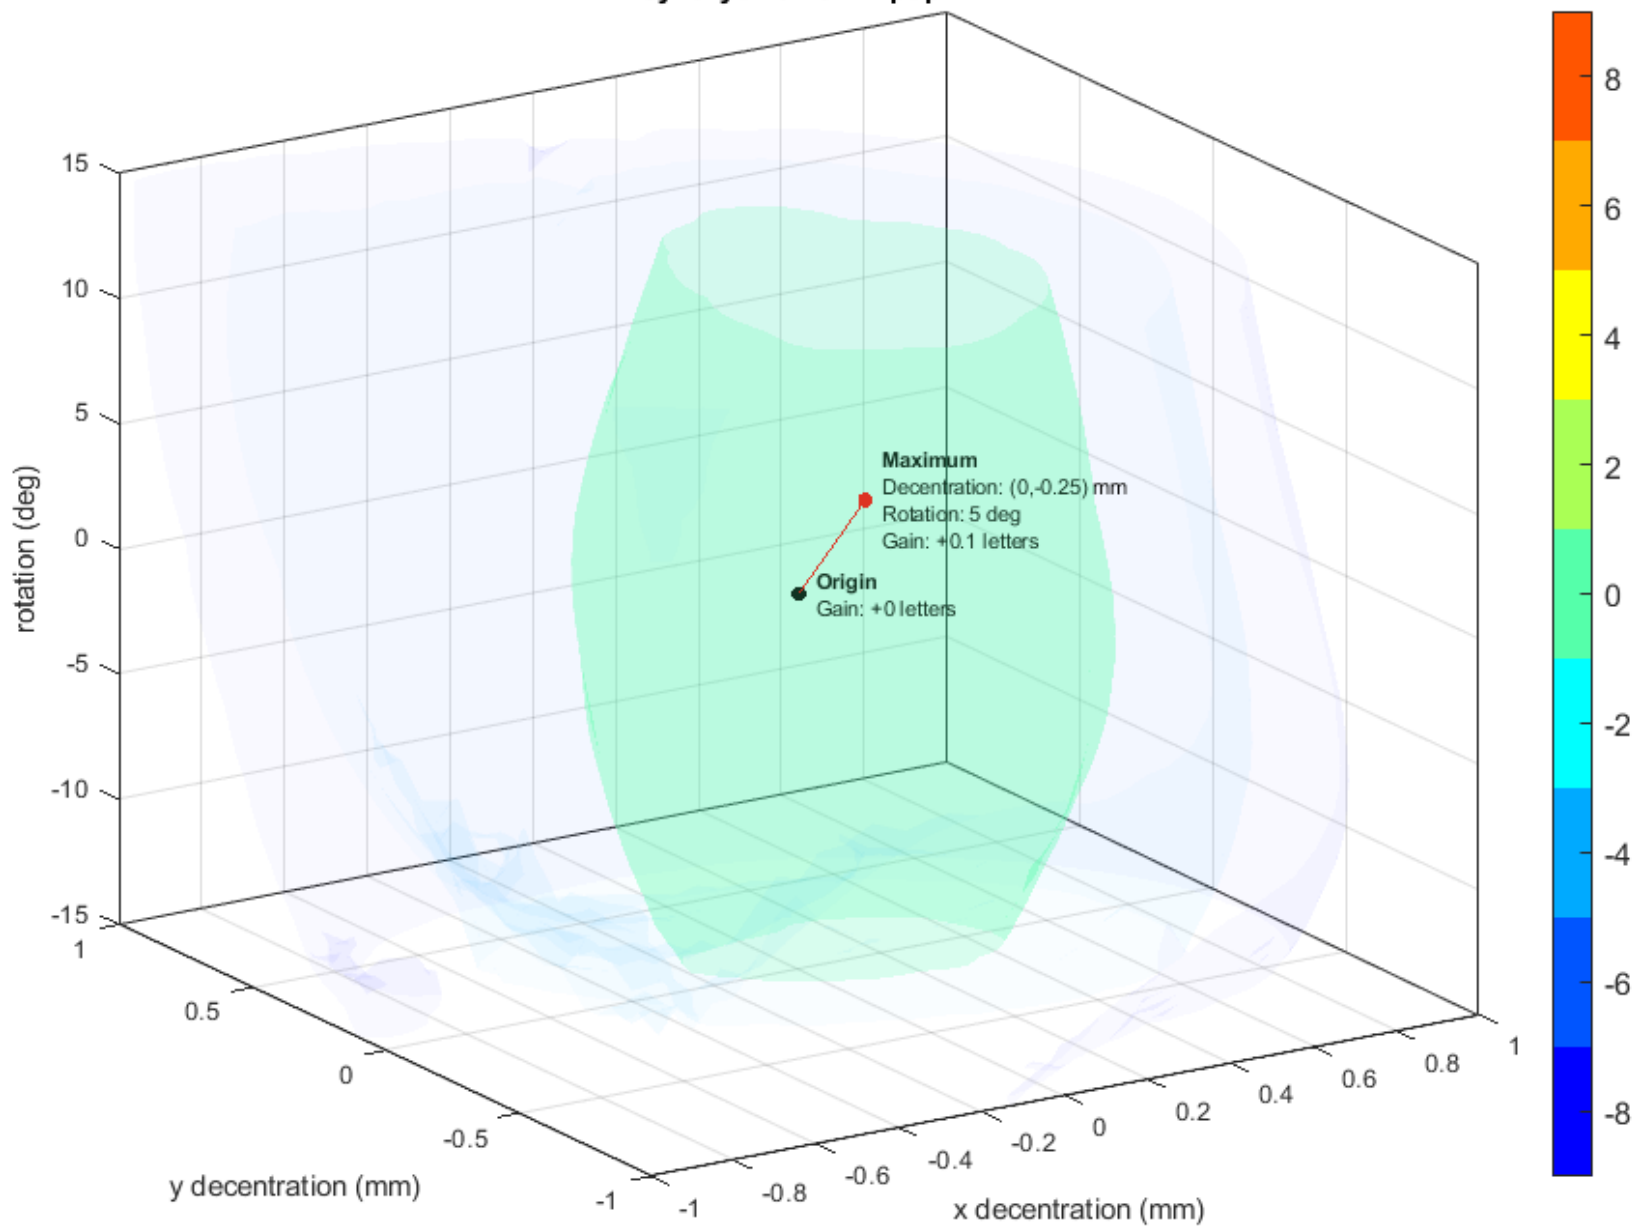

Supplement: NIHMS1830966-supplement-SUPINFO1.pdf [file NIHMS1830966-supplement-SUPINFO1.pdf]
